# Supplementary material for: Free Wanderer Powder regulates AMPA receptor homeostasis in chronic restraint stress-induced rat model of depression with liver-depression and spleen-deficiency syndrome
Source: Aging (Albany NY). 2020 Oct 14;12(19):19563–84. doi: 10.18632/aging.103912 (PMC7732332; doi:10.18632/aging.103912)
Supplement: Supplementary Table 1 [file aging-12-103912-s002..xlsx]

## Sheet: Sheet1
Table S1. Information of bioactive components in FWP
herb	NO	name	pubchem_cid	formula	mw	alogp	mlogp	xlogp	hba	hbd	psa	rotatable_bond	rings	heavy_atom	lipinski_failure	standard_inchi	standard_inchi_key	canonical_smiles
a	A1	Anisic acid	7478	C8H8O3	152.05	-0.2916	2.01	1.589	2	1	46.53	4	1	11	0	InChI=1S/C8H8O3/c1-11-7-4-2-6(3-5-7)8(9)10/h2-5H,1H3,(H,9,10)	ZEYHEAKUIGZSGI-UHFFFAOYSA-N	COc1ccc(cc1)C(=O)O
a	A3	Ligustilide	5319022	C12H14O2	190.1	0.8112	2.56	2.819	2	0	26.3	3	2	14	0	InChI=1S/C12H14O2/c1-2-3-8-11-9-6-4-5-7-10(9)12(13)14-11/h5,7-8H,2-4,6H2,1H3/b11-8-	IQVQXVFMNOFTMU-FLIBITNWSA-N	CCC/C=C/1OC(=O)C2=C1CCC=C2
am	AM1	Hydroxycoumarin	5281426	C9H6O3	162.03	-0.1903	2.12	1.532	1	1	46.53	1	2	12	0	InChI=1S/C9H6O3/c10-7-3-1-6-2-4-9(11)12-8(6)5-7/h1-5,10H	ORHBXUUXSCNDEV-UHFFFAOYSA-N	Oc1ccc2c(c1)oc(=O)cc2
am	AM2	Atractylenolide III	155948	C15H20O3	248.14	1.0608	2.78	2.47	3	1	46.53	3	3	18	0	InChI=1S/C15H20O3/c1-9-5-4-6-14(3)8-15(17)12(7-11(9)14)10(2)13(16)18-15/h11,17H,1,4-8H2,2-3H3/t11-,14+,15-/m0/s1	FBMORZZOJSDNRQ-GLQYFDAESA-N	C=C1CCC[C@]2([C@H]1CC1=C(C)C(=O)O[C@]1(C2)O)C
b	B3	Saikosaponin A	44202892	C42H68O13	780.47	-2.3562	4.65	3.954	13	8	207.99	21	8	55	2	InChI=1S/C42H68O13/c1-21-28(46)33(55-34-31(49)30(48)29(47)22(18-43)53-34)32(50)35(52-21)54-27-10-11-37(4)23(38(27,5)19-44)8-12-39(6)24(37)9-13-42-25-16-36(2,3)14-15-41(25,20-51-42)26(45)17-40(39,42)7/h9,13,21-35,43-50H,8,10-12,14-20H2,1-7H3/t21-,22-,23?,24?,25-,26+,27+,28+,29-,30+,31-,32-,33+,34+,35+,37+,38+,39-,40+,41-,42+/m1/s1	KYWSCMDFVARMPN-CGVHUNJDSA-N	OC[C@H]1O[C@@H](O[C@@H]2[C@@H](O)[C@@H](O[C@@H]([C@@H]2O)C)O[C@H]2CC[C@]3(C([C@]2(C)CO)CC[C@@]2(C3C=C[C@]34[C@@]2(C)C[C@@H]([C@@]2([C@H]4CC(C)(C)CC2)CO3)O)C)C)[C@@H]([C@H]([C@@H]1O)O)O
b	B2	Saikosaponin F	44202895	C48H80O17	928.54	-3.3929	4.87	4.857	17	11	277.91	28	8	65	2	InChI=1S/C48H80O17/c1-22-31(52)33(54)37(58)41(61-22)65-39-26(20-60-40-36(57)34(55)32(53)25(19-49)62-40)63-42(38(59)35(39)56)64-30-12-13-45(6)27(44(30,4)5)11-14-46(7)28(45)10-9-23-24-17-43(2,3)15-16-48(24,21-50)29(51)18-47(23,46)8/h9,22,24-42,49-59H,10-21H2,1-8H3/t22?,24-,25?,26?,27?,28+,29?,30?,31?,32?,33?,34-,35?,36?,37?,38?,39?,40?,41-,42?,45+,46-,47+,48+/m0/s1	SXILFEBNQCRWAL-RDJVAXCRSA-N	OCC1OC(OCC2OC(OC3CC[C@@]4(C(C3(C)C)CC[C@]3([C@@H]4CC=C4[C@@]3(C)CC([C@@]3([C@H]4CC(C)(C)CC3)CO)O)C)C)C(C(C2O[C@@H]2OC(C)C(C(C2O)O)O)O)O)C([C@H](C1O)O)O
g	G1	Glycyrrhizic acid	14982	C42H62O16	822.4	-1.6063	4.32	4.414	16	8	267.04	22	7	58	2	InChI=1S/C42H62O16/c1-37(2)21-8-11-42(7)31(20(43)16-18-19-17-39(4,36(53)54)13-12-38(19,3)14-15-41(18,42)6)40(21,5)10-9-22(37)55-35-30(26(47)25(46)29(57-35)33(51)52)58-34-27(48)23(44)24(45)28(56-34)32(49)50/h16,19,21-31,34-35,44-48H,8-15,17H2,1-7H3,(H,49,50)(H,51,52)(H,53,54)/t19-,21-,22-,23-,24-,25-,26-,27+,28-,29-,30+,31+,34-,35-,38+,39-,40-,41+,42+/m0/s1	LPLVUJXQOOQHMX-QWBHMCJMSA-N	O[C@@H]1[C@@H](O[C@@H]2O[C@H](C(=O)O)[C@H]([C@@H]([C@H]2O)O)O)[C@H](O[C@@H]([C@H]1O)C(=O)O)O[C@H]1CC[C@]2([C@H](C1(C)C)CC[C@@]1([C@@H]2C(=O)C=C2[C@@]1(C)CC[C@@]1([C@H]2C[C@](C)(CC1)C(=O)O)C)C)C
g	G2	Ononin	442813	C22H22O9	430.13	-2.9257	2.89	1.886	6	4	134.91	10	4	31	0	InChI=1S/C22H22O9/c1-28-12-4-2-11(3-5-12)15-10-29-16-8-13(6-7-14(16)18(15)24)30-22-21(27)20(26)19(25)17(9-23)31-22/h2-8,10,17,19-23,25-27H,9H2,1H3/t17-,19-,20+,21-,22-/m1/s1	MGJLSBDCWOSMHL-MIUGBVLSSA-N	OC[C@H]1O[C@@H](Oc2ccc3c(c2)occ(c3=O)c2ccc(cc2)OC)[C@@H]([C@H]([C@@H]1O)O)O
g	G3	4',7-Dihydroxyflavone	5282073	C15H10O4	254.06	-1.4242	2.67	2.53	1	2	66.76	3	3	19	0	InChI=1S/C15H10O4/c16-10-3-1-9(2-4-10)14-8-13(18)12-6-5-11(17)7-15(12)19-14/h1-8,16-17H	LCAWNFIFMLXZPQ-UHFFFAOYSA-N	Oc1ccc(cc1)c1cc(=O)c2c(o1)cc(cc2)O
g	G4	Formononetin	5280378	C16H12O4	268.07	-1.1788	2.78	2.994	1	1	55.76	4	3	20	0	InChI=1S/C16H12O4/c1-19-12-5-2-10(3-6-12)14-9-20-15-8-11(17)4-7-13(15)16(14)18/h2-9,17H,1H3	HKQYGTCOTHHOMP-UHFFFAOYSA-N	COc1ccc(cc1)c1coc2c(c1=O)ccc(c2)O
g	G5	Licoflavone A	5319000	C20H18O4	322.12	0.4532	3.22	4	1	2	66.76	7	3	24	0	InChI=1S/C20H18O4/c1-12(2)3-4-14-9-16-18(23)11-19(24-20(16)10-17(14)22)13-5-7-15(21)8-6-13/h3,5-11,21-22H,4H2,1-2H3	HJGURBGBPIKRER-UHFFFAOYSA-N	CC(=CCc1cc2c(=O)cc(oc2cc1O)c1ccc(cc1)O)C
m	M2	Rosmarinic Acid	5281792	C18H16O8	360.08	-1.9057	2.56	2.083	4	5	144.52	12	2	26	0	InChI=1S/C18H16O8/c19-12-4-1-10(7-14(12)21)3-6-17(23)26-16(18(24)25)9-11-2-5-13(20)15(22)8-11/h1-8,16,19-22H,9H2,(H,24,25)/b6-3+/t16-/m1/s1	DOUMFZQKYFQNTF-WUTVXBCWSA-N	O=C(O[C@@H](C(=O)O)Cc1ccc(c(c1)O)O)/C=C/c1ccc(c(c1)O)O
m	M3	3,4-Dihydroxybenzaldehyde	8768	C7H6O3	138.03	-1.113	1.9	0.95	1	2	57.53	3	1	10	0	InChI=1S/C7H6O3/c8-4-5-1-2-6(9)7(10)3-5/h1-4,9-10H	IBGBGRVKPALMCQ-UHFFFAOYSA-N	O=Cc1ccc(c(c1)O)O
m	M1	Lithospermic acid	6441498	C27H22O12	538.11	-2.955	3.11	1.877	6	7	211.28	16	4	39	1	InChI=1S/C27H22O12/c28-15-5-1-12(9-18(15)31)10-20(26(34)35)38-21(33)8-4-13-2-7-17(30)25-22(13)23(27(36)37)24(39-25)14-3-6-16(29)19(32)11-14/h1-9,11,20,23-24,28-32H,10H2,(H,34,35)(H,36,37)/b8-4+/t20-,23+,24-/m1/s1	UJZQBMQZMKFSRV-RGKBJLTCSA-N	O=C(O[C@@H](C(=O)O)Cc1ccc(c(c1)O)O)/C=C/c1ccc(c2c1[C@H](C(=O)O)[C@H](O2)c1ccc(c(c1)O)O)O
p	P1	Oxypaeoniflorin	46882883	C23H28O12	496.16	-3.8515	2.67	-0.376	11	6	184.6	14	5	35	2	InChI=1S/C23H28O12/c1-20-8-22(30)13-6-23(20,33-18-16(28)15(27)14(26)12(7-24)32-18)21(13,19(34-20)35-22)9-31-17(29)10-2-4-11(25)5-3-10/h2-5,12-16,18-19,24-28,30H,6-9H2,1H3/t12-,13+,14-,15+,16-,18+,19-,20+,21+,22-,23-/m1/s1	FCHVXNVDFYXLIL-QYDSDWLYSA-N	OC[C@H]1O[C@@H](O[C@]23C[C@H]4[C@@]3(COC(=O)c3ccc(cc3)O)[C@@H]3O[C@@]2(C)C[C@]4(O3)O)[C@@H]([C@H]([C@@H]1O)O)O
p	P2	Albiflorin	15558591	C23H28O11	480.16	-3.3767	2.78	0.81	11	5	172.21	13	4	34	1	InChI=1S/C23H28O11/c1-21-8-13(25)12-7-23(21,33-19-17(28)16(27)15(26)14(9-24)32-19)22(12,20(30)34-21)10-31-18(29)11-5-3-2-4-6-11/h2-6,12-17,19,24-28H,7-10H2,1H3/t12-,13+,14+,15+,16-,17+,19-,21-,22+,23-/m0/s1	QQUHMASGPODSIW-MBOWWSQSSA-N	OC[C@H]1O[C@@H](O[C@@]23C[C@@H]4[C@]3(COC(=O)c3ccccc3)C(=O)O[C@@]2(C)C[C@H]4O)[C@@H]([C@H]([C@@H]1O)O)O
z	Z1	6-Gingerol	442793	C17H26O4	294.18	-2.2553	2.89	2.887	2	2	66.76	14	1	21	0	InChI=1S/C17H26O4/c1-3-4-5-6-14(18)12-15(19)9-7-13-8-10-16(20)17(11-13)21-2/h8,10-11,14,18,20H,3-7,9,12H2,1-2H3/t14-/m0/s1	NLDDIKRKFXEWBK-AWEZNQCLSA-N	CCCCC[C@@H](CC(=O)CCc1ccc(c(c1)OC)O)O
