# Supplementary material for: Free Wanderer Powder regulates AMPA receptor homeostasis in chronic restraint stress-induced rat model of depression with liver-depression and spleen-deficiency syndrome
Source: Aging (Albany NY). 2020 Oct 14;12(19):19563–84. doi: 10.18632/aging.103912 (PMC7732332; doi:10.18632/aging.103912)
Supplement: Supplementary Table 2 [file aging-12-103912-s003..xlsx]

## Sheet: Sheet1
Table S2. Target information of bioactive components in FWP
herb	NO	pubchem_cid	Gene ID	Tax ID	Homologene Gene ID	Homologene Gene Tax ID	Gene Symbol	Synonyms	Type of Gene	Description	Gene Summary	Gene Location
g	G1	14982	43	H. sapiens	43	H. sapiens	ACHE	ACEE|ARACHE|N-ACHE|YT	protein-coding	acetylcholinesterase (Cartwright blood group)	Acetylcholinesterase hydrolyzes the neurotransmitter, acetylcholine at neuromuscular junctions and brain cholinergic synapses, and thus terminates signal transmission. It is also found on the red blood cell membranes, where it constitutes the Yt blood group antigen. Acetylcholinesterase exists in multiple molecular forms which possess similar catalytic properties, but differ in their oligomeric a…	chr7:100889994-100896129;chr7:100889994-100896994;chr7:100889994-100894606;chr7:100889994-100895888
am	AM1	5281426	43	H. sapiens	43	H. sapiens	ACHE	ACEE|ARACHE|N-ACHE|YT	protein-coding	acetylcholinesterase (Cartwright blood group)	Acetylcholinesterase hydrolyzes the neurotransmitter, acetylcholine at neuromuscular junctions and brain cholinergic synapses, and thus terminates signal transmission. It is also found on the red blood cell membranes, where it constitutes the Yt blood group antigen. Acetylcholinesterase exists in multiple molecular forms which possess similar catalytic properties, but differ in their oligomeric a…	chr7:100889994-100896129;chr7:100889994-100896994;chr7:100889994-100894606;chr7:100889994-100895888
g	G1	14982	134	H. sapiens	134	H. sapiens	ADORA1	RDC7	protein-coding	adenosine A1 receptor	The protein encoded by this gene is an adenosine receptor that belongs to the G-protein coupled receptor 1 family. There are 3 types of adenosine receptors, each with a specific pattern of ligand binding and tissue distribution, and together they regulate a diverse set of physiologic functions. The type A1 receptors inhibit adenylyl cyclase, and play a role in the fertilization process. Animal st…	chr1:203127726-203167405
g	G1	14982	135	H. sapiens	135	H. sapiens	ADORA2A	A2aR|ADORA2|RDC8	protein-coding	adenosine A2a receptor	This gene encodes a member of the guanine nucleotide-binding protein (G protein)-coupled receptor (GPCR) superfamily, which is subdivided into classes and subtypes. The receptors are seven-pass transmembrane proteins that respond to extracellular cues and activate intracellular signal transduction pathways. This protein, an adenosine receptor of A2A subtype, uses adenosine as the preferred endoge…	chr22:24427599-24442357;chr22:24432119-24442361;chr22:24423597-24442361
g	G1	14982	140	H. sapiens	140	H. sapiens	ADORA3	A3AR	protein-coding	adenosine A3 receptor	This gene encodes a protein that belongs to the family of adenosine receptors, which are G-protein-coupled receptors that are involved in a variety of intracellular signaling pathways and physiological functions. The receptor encoded by this gene mediates a sustained cardioprotective function during cardiac ischemia, it is involved in the inhibition of neutrophil degranulation in neutrophil-media…	chr1:111499429-111503633
g	G1	14982	146	H. sapiens	146	H. sapiens	ADRA1D	ADRA1|ADRA1A|ADRA1R|ALPHA1|DAR|dJ779E11.2	protein-coding	adrenoceptor alpha 1D	Alpha-1-adrenergic receptors (alpha-1-ARs) are members of the G protein-coupled receptor superfamily. They activate mitogenic responses and regulate growth and proliferation of many cells. There are 3 alpha-1-AR subtypes: alpha-1A, -1B and -1D, all of which signal through the Gq/11 family of G-proteins and different subtypes show different patterns of activation. This gene encodes alpha-1D-adrene…	chr20:4220630-4249287
g	G1	14982	150	H. sapiens	150	H. sapiens	ADRA2A	ADRA2|ADRA2R|ADRAR|ALPHA2AAR|ZNF32	protein-coding	adrenoceptor alpha 2A	Alpha-2-adrenergic receptors are members of the G protein-coupled receptor superfamily. The alpha-2-adrenergic receptors are a type of adrenergic receptors (for adrenaline or epinephrine), which inhibit adenylate cyclase. These receptors include 3 highly homologous subtypes: alpha2A, alpha2B, and alpha2C. They are involved in regulating the release of neurotransmitter molecules from sympathetic n…	chr10:111077029-111080904
g	G1	14982	151	H. sapiens	151	H. sapiens	ADRA2B	ADRA2L1|ADRA2RL1|ADRARL1|ALPHA2BAR|FAME2|alpha-2BAR	protein-coding	adrenoceptor alpha 2B	This intronless gene encodes a seven-pass transmembrane protein. This protein is a member of a subfamily of G protein-coupled receptors that regulate neurotransmitter release from sympathetic nerves and from adrenergic neurons in the central nervous system. [provided by RefSeq, Apr 2014]	chr2:96112876-96116571
g	G1	14982	152	H. sapiens	152	H. sapiens	ADRA2C	ADRA2L2|ADRA2RL2|ADRARL2|ALPHA2CAR	protein-coding	adrenoceptor alpha 2C	Alpha-2-adrenergic receptors are members of the G protein-coupled receptor superfamily. They include 3 highly homologous subtypes: alpha2A, alpha2B, and alpha2C. These receptors have a critical role in regulating neurotransmitter release from sympathetic nerves and from adrenergic neurons in the central nervous system. The mouse studies revealed that both the alpha2A and alpha2C subtypes were req…	chr4:3766385-3768526
g	G1	14982	153	H. sapiens	153	H. sapiens	ADRB1	ADRB1R|B1AR|BETA1AR|FNSS2|RHR	protein-coding	adrenoceptor beta 1	The adrenergic receptors (subtypes alpha 1, alpha 2, beta 1, and beta 2) are a prototypic family of guanine nucleotide binding regulatory protein-coupled receptors that mediate the physiological effects of the hormone epinephrine and the neurotransmitter norepinephrine. Beta-1 adrenoceptors are predominately located in the heart. Specific polymorphisms in this gene have been shown to affect the r…	chr10:114043866-114046904
g	G1	14982	154	H. sapiens	154	H. sapiens	ADRB2	ADRB2R|ADRBR|B2AR|BAR|BETA2AR	protein-coding	adrenoceptor beta 2	This gene encodes beta-2-adrenergic receptor which is a member of the G protein-coupled receptor superfamily. This receptor is directly associated with one of its ultimate effectors, the class C L-type calcium channel Ca(V)1.2. This receptor-channel complex also contains a G protein, an adenylyl cyclase, cAMP-dependent kinase, and the counterbalancing phosphatase, PP2A. The assembly of the signal…	chr5:148826611-148828623
g	G1	14982	155	H. sapiens	155	H. sapiens	ADRB3	BETA3AR	protein-coding	adrenoceptor beta 3	The protein encoded by this gene belongs to the family of beta adrenergic receptors, which mediate catecholamine-induced activation of adenylate cyclase through the action of G proteins. This receptor is located mainly in the adipose tissue and is involved in the regulation of lipolysis and thermogenesis. Obesity and bodyweight-related disorders are correlated with certain polymorphisms in three …	chr8:37962990-37966599
g	G1	14982	186	H. sapiens	186	H. sapiens	AGTR2	AT2|ATGR2|MRX88	protein-coding	angiotensin II receptor type 2	The protein encoded by this gene belongs to the G-protein coupled receptor 1 family, and functions as a receptor for angiotensin II. It is an intergral membrane protein that is highly expressed in fetus, but scantily in adult tissues, except brain, adrenal medulla, and atretic ovary. This receptor has been shown to mediate programmed cell death and this apoptotic function may play an important ro…	chrX:116170744-116174974
g	G4	5280378	190	H. sapiens	190	H. sapiens	NR0B1	AHC|AHCH|AHX|DAX-1|DAX1|DSS|GTD|HHG|NROB1|SRXY2	protein-coding	nuclear receptor subfamily 0 group B member 1	This gene encodes a protein that contains a DNA-binding domain. The encoded protein acts as a dominant-negative regulator of transcription which is mediated by the retinoic acid receptor. This protein also functions as an anti-testis gene by acting antagonistically to Sry. Mutations in this gene result in both X-linked congenital adrenal hypoplasia and hypogonadotropic hypogonadism. [provided by …	chrX:30304206-30309390
g	G4	5280378	196	H. sapiens	196	H. sapiens	AHR	RP85|bHLHe76	protein-coding	aryl hydrocarbon receptor	The protein encoded by this gene is a ligand-activated helix-loop-helix transcription factor involved in the regulation of biological responses to planar aromatic hydrocarbons. This receptor has been shown to regulate xenobiotic-metabolizing enzymes such as cytochrome P450. Before ligand binding, the encoded protein is sequestered in the cytoplasm; upon ligand binding, this protein moves to the n…	chr7:17298652-17346147
am	AM1	5281426	216	H. sapiens	216	H. sapiens	ALDH1A1	ALDC|ALDH-E1|ALDH1|ALDH11|HEL-9|HEL-S-53e|HEL12|PUMB1|RALDH1	protein-coding	aldehyde dehydrogenase 1 family member A1	The protein encoded by this gene belongs to the aldehyde dehydrogenase family. Aldehyde dehydrogenase is the next enzyme after alcohol dehydrogenase in the major pathway of alcohol metabolism. There are two major aldehyde dehydrogenase isozymes in the liver, cytosolic and mitochondrial, which are encoded by distinct genes, and can be distinguished by their electrophoretic mobility, kinetic proper…	chr9:72900671-72953053
g	G4	5280378	216	H. sapiens	216	H. sapiens	ALDH1A1	ALDC|ALDH-E1|ALDH1|ALDH11|HEL-9|HEL-S-53e|HEL12|PUMB1|RALDH1	protein-coding	aldehyde dehydrogenase 1 family member A1	The protein encoded by this gene belongs to the aldehyde dehydrogenase family. Aldehyde dehydrogenase is the next enzyme after alcohol dehydrogenase in the major pathway of alcohol metabolism. There are two major aldehyde dehydrogenase isozymes in the liver, cytosolic and mitochondrial, which are encoded by distinct genes, and can be distinguished by their electrophoretic mobility, kinetic proper…	chr9:72900671-72953053
g	G3	5282073	216	H. sapiens	216	H. sapiens	ALDH1A1	ALDC|ALDH-E1|ALDH1|ALDH11|HEL-9|HEL-S-53e|HEL12|PUMB1|RALDH1	protein-coding	aldehyde dehydrogenase 1 family member A1	The protein encoded by this gene belongs to the aldehyde dehydrogenase family. Aldehyde dehydrogenase is the next enzyme after alcohol dehydrogenase in the major pathway of alcohol metabolism. There are two major aldehyde dehydrogenase isozymes in the liver, cytosolic and mitochondrial, which are encoded by distinct genes, and can be distinguished by their electrophoretic mobility, kinetic proper…	chr9:72900671-72953053
g	G2	442813	217	H. sapiens	217	H. sapiens	ALDH2	ALDH-E2|ALDHI|ALDM	protein-coding	aldehyde dehydrogenase 2 family member	This protein belongs to the aldehyde dehydrogenase family of proteins. Aldehyde dehydrogenase is the second enzyme of the major oxidative pathway of alcohol metabolism. Two major liver isoforms of aldehyde dehydrogenase, cytosolic and mitochondrial, can be distinguished by their electrophoretic mobilities, kinetic properties, and subcellular localizations. Most Caucasians have two major isozymes,…	chr12:111766933-111817531
g	G3	5282073	217	H. sapiens	217	H. sapiens	ALDH2	ALDH-E2|ALDHI|ALDM	protein-coding	aldehyde dehydrogenase 2 family member	This protein belongs to the aldehyde dehydrogenase family of proteins. Aldehyde dehydrogenase is the second enzyme of the major oxidative pathway of alcohol metabolism. Two major liver isoforms of aldehyde dehydrogenase, cytosolic and mitochondrial, can be distinguished by their electrophoretic mobilities, kinetic properties, and subcellular localizations. Most Caucasians have two major isozymes,…	chr12:111766933-111817531
am	AM1	5281426	231	H. sapiens	231	H. sapiens	AKR1B1	ADR|ALDR1|ALR2|AR	protein-coding	aldo-keto reductase family 1 member B	This gene encodes a member of the aldo/keto reductase superfamily, which consists of more than 40 known enzymes and proteins. This member catalyzes the reduction of a number of aldehydes, including the aldehyde form of glucose, and is thereby implicated in the development of diabetic complications by catalyzing the reduction of glucose to sorbitol. Multiple pseudogenes have been identified for th…	chr7:134442350-134459192;chr7:134442350-134459239;chr7:134442356-134459100
m	M2	5281792	231	H. sapiens	231	H. sapiens	AKR1B1	ADR|ALDR1|ALR2|AR	protein-coding	aldo-keto reductase family 1 member B	This gene encodes a member of the aldo/keto reductase superfamily, which consists of more than 40 known enzymes and proteins. This member catalyzes the reduction of a number of aldehydes, including the aldehyde form of glucose, and is thereby implicated in the development of diabetic complications by catalyzing the reduction of glucose to sorbitol. Multiple pseudogenes have been identified for th…	chr7:134442350-134459192;chr7:134442350-134459239;chr7:134442356-134459100
g	G2	442813	231	H. sapiens	231	H. sapiens	AKR1B1	ADR|ALDR1|ALR2|AR	protein-coding	aldo-keto reductase family 1 member B	This gene encodes a member of the aldo/keto reductase superfamily, which consists of more than 40 known enzymes and proteins. This member catalyzes the reduction of a number of aldehydes, including the aldehyde form of glucose, and is thereby implicated in the development of diabetic complications by catalyzing the reduction of glucose to sorbitol. Multiple pseudogenes have been identified for th…	chr7:134442350-134459192;chr7:134442350-134459239;chr7:134442356-134459100
g	G3	5282073	240	H. sapiens	240	H. sapiens	ALOX5	5-LO|5-LOX|5LPG|LOG5	protein-coding	arachidonate 5-lipoxygenase	This gene encodes a member of the lipoxygenase gene family and plays a dual role in the synthesis of leukotrienes from arachidonic acid. The encoded protein, which is expressed specifically in bone marrow-derived cells, catalyzes the conversion of arachidonic acid to 5(S)-hydroperoxy-6-trans-8,11,14-cis-eicosatetraenoic acid, and further to the allylic epoxide 5(S)-trans-7,9-trans-11,14-cis-eicos…	chr10_GL383546v1_alt:214997-286950;chr10:45374216-45446115;chr10_GL383546v1_alt:215047-286946;chr10:45374166-45446119
z	Z1	442793	240	H. sapiens	240	H. sapiens	ALOX5	5-LO|5-LOX|5LPG|LOG5	protein-coding	arachidonate 5-lipoxygenase	This gene encodes a member of the lipoxygenase gene family and plays a dual role in the synthesis of leukotrienes from arachidonic acid. The encoded protein, which is expressed specifically in bone marrow-derived cells, catalyzes the conversion of arachidonic acid to 5(S)-hydroperoxy-6-trans-8,11,14-cis-eicosatetraenoic acid, and further to the allylic epoxide 5(S)-trans-7,9-trans-11,14-cis-eicos…	chr10_GL383546v1_alt:214997-286950;chr10:45374216-45446115;chr10_GL383546v1_alt:215047-286946;chr10:45374166-45446119
am	AM2	155948	240	H. sapiens	240	H. sapiens	ALOX5	5-LO|5-LOX|5LPG|LOG5	protein-coding	arachidonate 5-lipoxygenase	This gene encodes a member of the lipoxygenase gene family and plays a dual role in the synthesis of leukotrienes from arachidonic acid. The encoded protein, which is expressed specifically in bone marrow-derived cells, catalyzes the conversion of arachidonic acid to 5(S)-hydroperoxy-6-trans-8,11,14-cis-eicosatetraenoic acid, and further to the allylic epoxide 5(S)-trans-7,9-trans-11,14-cis-eicos…	chr10_GL383546v1_alt:214997-286950;chr10:45374216-45446115;chr10_GL383546v1_alt:215047-286946;chr10:45374166-45446119
m	M2	5281792	328	H. sapiens	328	H. sapiens	APEX1	APE|APE1|APEN|APEX|APX|HAP1|REF1	protein-coding	apurinic/apyrimidinic endodeoxyribonuclease 1	The APEX gene encodes the major AP endonuclease in human cells. It encodes the APEX endonuclease, a DNA repair enzyme with apurinic/apyrimidinic (AP) activity. Such AP activity sites occur frequently in DNA molecules by spontaneous hydrolysis, by DNA damaging agents or by DNA glycosylases that remove specific abnormal bases. The AP sites are the most frequent pre-mutagenic lesions that can preven…	chr14:20455226-20457767
m	M2	5315615	328	H. sapiens	328	H. sapiens	APEX1	APE|APE1|APEN|APEX|APX|HAP1|REF1	protein-coding	apurinic/apyrimidinic endodeoxyribonuclease 1	The APEX gene encodes the major AP endonuclease in human cells. It encodes the APEX endonuclease, a DNA repair enzyme with apurinic/apyrimidinic (AP) activity. Such AP activity sites occur frequently in DNA molecules by spontaneous hydrolysis, by DNA damaging agents or by DNA glycosylases that remove specific abnormal bases. The AP sites are the most frequent pre-mutagenic lesions that can preven…	chr14:20455226-20457767
am	AM1	5281426	351	H. sapiens	351	H. sapiens	APP	AAA|ABETA|ABPP|AD1|APPI|CTFgamma|CVAP|PN-II|PN2|preA4	protein-coding	amyloid beta precursor protein	This gene encodes a cell surface receptor and transmembrane precursor protein that is cleaved by secretases to form a number of peptides. Some of these peptides are secreted and can bind to the acetyltransferase complex APBB1/TIP60 to promote transcriptional activation, while others form the protein basis of the amyloid plaques found in the brains of patients with Alzheimer disease. In addition, …	chr21:25880550-26170770;chr21:25880550-26140390;chr21:25880550-26171128
m	M2	5281792	351	H. sapiens	351	H. sapiens	APP	AAA|ABETA|ABPP|AD1|APPI|CTFgamma|CVAP|PN-II|PN2|preA4	protein-coding	amyloid beta precursor protein	This gene encodes a cell surface receptor and transmembrane precursor protein that is cleaved by secretases to form a number of peptides. Some of these peptides are secreted and can bind to the acetyltransferase complex APBB1/TIP60 to promote transcriptional activation, while others form the protein basis of the amyloid plaques found in the brains of patients with Alzheimer disease. In addition, …	chr21:25880550-26170770;chr21:25880550-26140390;chr21:25880550-26171128
g	G1	14982	367	H. sapiens	367	H. sapiens	AR	AIS|AR8|DHTR|HUMARA|HYSP1|KD|NR3C4|SBMA|SMAX1|TFM	protein-coding	androgen receptor	The androgen receptor gene is more than 90 kb long and codes for a protein that has 3 major functional domains: the N-terminal domain, DNA-binding domain, and androgen-binding domain. The protein functions as a steroid-hormone activated transcription factor. Upon binding the hormone ligand, the receptor dissociates from accessory proteins, translocates into the nucleus, dimerizes, and then stimul…	chrX:67544021-67730619;chrX:67544623-67730619;chrX:67544623-67696075;chrX:67544623-67689758
g	G4	5280378	367	H. sapiens	367	H. sapiens	AR	AIS|AR8|DHTR|HUMARA|HYSP1|KD|NR3C4|SBMA|SMAX1|TFM	protein-coding	androgen receptor	The androgen receptor gene is more than 90 kb long and codes for a protein that has 3 major functional domains: the N-terminal domain, DNA-binding domain, and androgen-binding domain. The protein functions as a steroid-hormone activated transcription factor. Upon binding the hormone ligand, the receptor dissociates from accessory proteins, translocates into the nucleus, dimerizes, and then stimul…	chrX:67544021-67730619;chrX:67544623-67730619;chrX:67544623-67696075;chrX:67544623-67689758
g	G1	14982	552	H. sapiens	552	H. sapiens	AVPR1A	AVPR V1a|AVPR1|V1aR	protein-coding	arginine vasopressin receptor 1A	The protein encoded by this gene acts as receptor for arginine vasopressin. This receptor belongs to the subfamily of G-protein coupled receptors which includes AVPR1B, V2R and OXT receptors. Its activity is mediated by G proteins which stimulate a phosphatidylinositol-calcium second messenger system. The receptor mediates cell contraction and proliferation, platelet aggregation, release of coagu…	chr12:63142759-63151201
g	G1	14982	624	H. sapiens	624	H. sapiens	BDKRB2	B2R|BK-2|BK2|BKR2|BRB2	protein-coding	bradykinin receptor B2	This gene encodes a receptor for bradykinin. The 9 aa bradykinin peptide elicits many responses including vasodilation, edema, smooth muscle spasm and pain fiber stimulation. Bradykinin is released upon activation by pathophysiologic conditions such as trauma and inflammation, and binds to its kinin receptors, B1 and B2. The B2 receptor associates with G proteins that stimulate a phosphatidylinos…	chr14:96204798-96244329
m	M2	5281792	641	H. sapiens	641	H. sapiens	BLM	BS|MGRISCE1|RECQ2|RECQL2|RECQL3	protein-coding	BLM RecQ like helicase	The Bloom syndrome gene product is related to the RecQ subset of DExH box-containing DNA helicases and has both DNA-stimulated ATPase and ATP-dependent DNA helicase activities. Mutations causing Bloom syndrome delete or alter helicase motifs and may disable the 3'-5' helicase activity. The normal protein may act to suppress inappropriate recombination. [provided by RefSeq, Jul 2008]	chr15:90717346-90816166
g	G4	5280378	672	H. sapiens	672	H. sapiens	BRCA1	BRCAI|BRCC1|BROVCA1|FANCS|IRIS|PNCA4|PPP1R53|PSCP|RNF53	protein-coding	BRCA1 DNA repair associated	This gene encodes a nuclear phosphoprotein that plays a role in maintaining genomic stability, and it also acts as a tumor suppressor. The encoded protein combines with other tumor suppressors, DNA damage sensors, and signal transducers to form a large multi-subunit protein complex known as the BRCA1-associated genome surveillance complex (BASC). This gene product associates with RNA polymerase I…	chr17:43044295-43125364;chr17:43044295-43124115
g	G2	442813	672	H. sapiens	672	H. sapiens	BRCA1	BRCAI|BRCC1|BROVCA1|FANCS|IRIS|PNCA4|PPP1R53|PSCP|RNF53	protein-coding	BRCA1 DNA repair associated	This gene encodes a nuclear phosphoprotein that plays a role in maintaining genomic stability, and it also acts as a tumor suppressor. The encoded protein combines with other tumor suppressors, DNA damage sensors, and signal transducers to form a large multi-subunit protein complex known as the BRCA1-associated genome surveillance complex (BASC). This gene product associates with RNA polymerase I…	chr17:43044295-43125364;chr17:43044295-43124115
g	G2	3733033	672	H. sapiens	672	H. sapiens	BRCA1	BRCAI|BRCC1|BROVCA1|FANCS|IRIS|PNCA4|PPP1R53|PSCP|RNF53	protein-coding	BRCA1 DNA repair associated	This gene encodes a nuclear phosphoprotein that plays a role in maintaining genomic stability, and it also acts as a tumor suppressor. The encoded protein combines with other tumor suppressors, DNA damage sensors, and signal transducers to form a large multi-subunit protein complex known as the BRCA1-associated genome surveillance complex (BASC). This gene product associates with RNA polymerase I…	chr17:43044295-43125364;chr17:43044295-43124115
am	AM1	5281426	759	H. sapiens	759	H. sapiens	CA1	CA-I|CAB|Car1|HEL-S-11	protein-coding	carbonic anhydrase 1	Carbonic anhydrases (CAs) are a large family of zinc metalloenzymes that catalyze the reversible hydration of carbon dioxide. They participate in a variety of biological processes, including respiration, calcification, acid-base balance, bone resorption, and the formation of aqueous humor, cerebrospinal fluid, saliva and gastric acid. They show extensive diversity in tissue distribution and in th…	chr8:85327608-85378113;chr8:85327608-85341714
a	A1	7478	759	H. sapiens	759	H. sapiens	CA1	CA-I|CAB|Car1|HEL-S-11	protein-coding	carbonic anhydrase 1	Carbonic anhydrases (CAs) are a large family of zinc metalloenzymes that catalyze the reversible hydration of carbon dioxide. They participate in a variety of biological processes, including respiration, calcification, acid-base balance, bone resorption, and the formation of aqueous humor, cerebrospinal fluid, saliva and gastric acid. They show extensive diversity in tissue distribution and in th…	chr8:85327608-85378113;chr8:85327608-85341714
m	M1	6441498	759	H. sapiens	759	H. sapiens	CA1	CA-I|CAB|Car1|HEL-S-11	protein-coding	carbonic anhydrase 1	Carbonic anhydrases (CAs) are a large family of zinc metalloenzymes that catalyze the reversible hydration of carbon dioxide. They participate in a variety of biological processes, including respiration, calcification, acid-base balance, bone resorption, and the formation of aqueous humor, cerebrospinal fluid, saliva and gastric acid. They show extensive diversity in tissue distribution and in th…	chr8:85327608-85378113;chr8:85327608-85341714
g	G1	14982	760	H. sapiens	760	H. sapiens	CA2	CA-II|CAC|CAII|Car2|HEL-76|HEL-S-282	protein-coding	carbonic anhydrase 2	The protein encoded by this gene is one of several isozymes of carbonic anhydrase, which catalyzes reversible hydration of carbon dioxide. Defects in this enzyme are associated with osteopetrosis and renal tubular acidosis. Two transcript variants encoding different isoforms have been found for this gene. [provided by RefSeq, Jun 2014]	chr8:85463902-85481492;chr8:85464007-85481493
am	AM1	5281426	760	H. sapiens	760	H. sapiens	CA2	CA-II|CAC|CAII|Car2|HEL-76|HEL-S-282	protein-coding	carbonic anhydrase 2	The protein encoded by this gene is one of several isozymes of carbonic anhydrase, which catalyzes reversible hydration of carbon dioxide. Defects in this enzyme are associated with osteopetrosis and renal tubular acidosis. Two transcript variants encoding different isoforms have been found for this gene. [provided by RefSeq, Jun 2014]	chr8:85463902-85481492;chr8:85464007-85481493
a	A1	7478	760	H. sapiens	760	H. sapiens	CA2	CA-II|CAC|CAII|Car2|HEL-76|HEL-S-282	protein-coding	carbonic anhydrase 2	The protein encoded by this gene is one of several isozymes of carbonic anhydrase, which catalyzes reversible hydration of carbon dioxide. Defects in this enzyme are associated with osteopetrosis and renal tubular acidosis. Two transcript variants encoding different isoforms have been found for this gene. [provided by RefSeq, Jun 2014]	chr8:85463902-85481492;chr8:85464007-85481493
m	M1	6441498	760	H. sapiens	760	H. sapiens	CA2	CA-II|CAC|CAII|Car2|HEL-76|HEL-S-282	protein-coding	carbonic anhydrase 2	The protein encoded by this gene is one of several isozymes of carbonic anhydrase, which catalyzes reversible hydration of carbon dioxide. Defects in this enzyme are associated with osteopetrosis and renal tubular acidosis. Two transcript variants encoding different isoforms have been found for this gene. [provided by RefSeq, Jun 2014]	chr8:85463902-85481492;chr8:85464007-85481493
m	M1	6441498	762	H. sapiens	762	H. sapiens	CA4	CAIV|Car4|RP17	protein-coding	carbonic anhydrase 4	Carbonic anhydrases (CAs) are a large family of zinc metalloenzymes that catalyze the reversible hydration of carbon dioxide. They participate in a variety of biological processes, including respiration, calcification, acid-base balance, bone resorption, and the formation of aqueous humor, cerebrospinal fluid, saliva, and gastric acid. They show extensive diversity in tissue distribution and in t…	chr17:60149973-60179021;chr17:60149973-60159545
m	M1	6441498	766	H. sapiens	766	H. sapiens	CA7	CA-VII|CAVII	protein-coding	carbonic anhydrase 7	Carbonic anhydrases are a large family of zinc metalloenzymes that catalyze the reversible hydration of carbon dioxide. They participate in a variety of biological processes, including respiration, calcification, acid-base balance, bone resorption, and the formation of aqueous humor, cerebrospinal fluid, saliva, and gastric acid. They show extensive diversity in tissue distribution and in their s…	chr16:66844929-66854146;chr16:66844414-66854146
am	AM1	5281426	768	H. sapiens	768	H. sapiens	CA9	CAIX|MN	protein-coding	carbonic anhydrase 9	Carbonic anhydrases (CAs) are a large family of zinc metalloenzymes that catalyze the reversible hydration of carbon dioxide. They participate in a variety of biological processes, including respiration, calcification, acid-base balance, bone resorption, and the formation of aqueous humor, cerebrospinal fluid, saliva, and gastric acid. They show extensive diversity in tissue distribution and in t…	chr9:35673928-35681157
am	AM1	5281426	771	H. sapiens	771	H. sapiens	CA12	CA-XII|CAXII|HsT18816|T18816	protein-coding	carbonic anhydrase 12	Carbonic anhydrases (CAs) are a large family of zinc metalloenzymes that catalyze the reversible hydration of carbon dioxide. They participate in a variety of biological processes, including respiration, calcification, acid-base balance, bone resorption, and the formation of aqueous humor, cerebrospinal fluid, saliva, and gastric acid. This gene product is a type I membrane protein that is highly…	chr15:63321378-63381846;chr15:63323531-63382110
m	M1	6441498	771	H. sapiens	771	H. sapiens	CA12	CA-XII|CAXII|HsT18816|T18816	protein-coding	carbonic anhydrase 12	Carbonic anhydrases (CAs) are a large family of zinc metalloenzymes that catalyze the reversible hydration of carbon dioxide. They participate in a variety of biological processes, including respiration, calcification, acid-base balance, bone resorption, and the formation of aqueous humor, cerebrospinal fluid, saliva, and gastric acid. This gene product is a type I membrane protein that is highly…	chr15:63321378-63381846;chr15:63323531-63382110
g	G1	14982	799	H. sapiens	799	H. sapiens	CALCR	CRT|CT-R|CTR|CTR1	protein-coding	calcitonin receptor	This gene encodes a high affinity receptor for the peptide hormone calcitonin and belongs to a subfamily of seven transmembrane-spanning G protein-coupled receptors. The encoded protein is involved in maintaining calcium homeostasis and in regulating osteoclast-mediated bone resorption. Polymorphisms in this gene have been associated with variations in bone mineral density and onset of osteoporos…	chr7:93424488-93574730;chr7:93424487-93559810;chr7:93424486-93574724
g	G1	14982	834	H. sapiens	834	H. sapiens	CASP1	ICE|IL1BC|P45	protein-coding	caspase 1	This gene encodes a protein which is a member of the cysteine-aspartic acid protease (caspase) family. Sequential activation of caspases plays a central role in the execution-phase of cell apoptosis. Caspases exist as inactive proenzymes which undergo proteolytic processing at conserved aspartic residues to produce 2 subunits, large and small, that dimerize to form the active enzyme. This gene wa…	chr11:105025443-105035144;chr11:105025510-105035157;chr11:105025510-105035144
am	AM1	5281426	834	H. sapiens	834	H. sapiens	CASP1	ICE|IL1BC|P45	protein-coding	caspase 1	This gene encodes a protein which is a member of the cysteine-aspartic acid protease (caspase) family. Sequential activation of caspases plays a central role in the execution-phase of cell apoptosis. Caspases exist as inactive proenzymes which undergo proteolytic processing at conserved aspartic residues to produce 2 subunits, large and small, that dimerize to form the active enzyme. This gene wa…	chr11:105025443-105035144;chr11:105025510-105035157;chr11:105025510-105035144
g	G4	5280378	836	H. sapiens	836	H. sapiens	CASP3	CPP32|CPP32B|SCA-1	protein-coding	caspase 3	The protein encoded by this gene is a cysteine-aspartic acid protease that plays a central role in the execution-phase of cell apoptosis. The encoded protein cleaves and inactivates poly(ADP-ribose) polymerase while it cleaves and activates sterol regulatory element binding proteins as well as caspases 6, 7, and 9. This protein itself is processed by caspases 8, 9, and 10. It is the predominant c…	chr4:184627696-184649475;chr4:184627696-184649447
am	AM1	5281426	840	H. sapiens	840	H. sapiens	CASP7	CASP-7|CMH-1|ICE-LAP3|LICE2|MCH3	protein-coding	caspase 7	This gene encodes a member of the cysteine-aspartic acid protease (caspase) family. Sequential activation of caspases plays a central role in the execution-phase of cell apoptosis. Caspases exist as inactive proenzymes which undergo proteolytic processing at conserved aspartic residues to produce two subunits, large and small, that dimerize to form the active enzyme. The precursor of the encoded …	chr10:113709345-113730909;chr10:113679162-113730909;chr10:113679912-113730905;chr10:113679194-113730905;chr10:113679669-113730909
g	G4	5280378	840	H. sapiens	840	H. sapiens	CASP7	CASP-7|CMH-1|ICE-LAP3|LICE2|MCH3	protein-coding	caspase 7	This gene encodes a member of the cysteine-aspartic acid protease (caspase) family. Sequential activation of caspases plays a central role in the execution-phase of cell apoptosis. Caspases exist as inactive proenzymes which undergo proteolytic processing at conserved aspartic residues to produce two subunits, large and small, that dimerize to form the active enzyme. The precursor of the encoded …	chr10:113709345-113730909;chr10:113679162-113730909;chr10:113679912-113730905;chr10:113679194-113730905;chr10:113679669-113730909
g	G1	14982	886	H. sapiens	886	H. sapiens	CCKAR	CCK-A|CCK1-R|CCK1R|CCKRA	protein-coding	cholecystokinin A receptor	This gene encodes a G-protein coupled receptor that binds non-sulfated members of the cholecystokinin (CCK) family of peptide hormones. This receptor is a major physiologic mediator of pancreatic enzyme secretion and smooth muscle contraction of the gallbladder and stomach. In the central and peripheral nervous system this receptor regulates satiety and the release of beta-endorphin and dopamine.…	chr4:26481396-26490484
g	G1	14982	1128	H. sapiens	1128	H. sapiens	CHRM1	HM1|M1|M1R	protein-coding	cholinergic receptor muscarinic 1	The muscarinic cholinergic receptors belong to a larger family of G protein-coupled receptors. The functional diversity of these receptors is defined by the binding of acetylcholine and includes cellular responses such as adenylate cyclase inhibition, phosphoinositide degeneration, and potassium channel mediation. Muscarinic receptors influence many effects of acetylcholine in the central and per…	chr11:62908679-62921363
g	G1	14982	1129	H. sapiens	1129	H. sapiens	CHRM2	HM2	protein-coding	cholinergic receptor muscarinic 2	The muscarinic cholinergic receptors belong to a larger family of G protein-coupled receptors. The functional diversity of these receptors is defined by the binding of acetylcholine to these receptors and includes cellular responses such as adenylate cyclase inhibition, phosphoinositide degeneration, and potassium channel mediation. Muscarinic receptors influence many effects of acetylcholine in …	chr7:136868652-137017024;chr7:136869085-137020247;chr7:136869085-137017024;chr7:136869246-137020247;chr7:136868652-137020247
g	G1	14982	1131	H. sapiens	1131	H. sapiens	CHRM3	EGBRS|HM3|PBS	protein-coding	cholinergic receptor muscarinic 3	The muscarinic cholinergic receptors belong to a larger family of G protein-coupled receptors. The functional diversity of these receptors is defined by the binding of acetylcholine and includes cellular responses such as adenylate cyclase inhibition, phosphoinositide degeneration, and potassium channel mediation. Muscarinic receptors influence many effects of acetylcholine in the central and per…	chr1:239386568-239915449;chr1:239629073-239915449;chr1:239386568-239886598
g	G1	14982	1132	H. sapiens	1132	H. sapiens	CHRM4	HM4|M4R	protein-coding	cholinergic receptor muscarinic 4	The muscarinic cholinergic receptors belong to a larger family of G protein-coupled receptors. The functional diversity of these receptors is defined by the binding of acetylcholine and includes cellular responses such as adenylate cyclase inhibition, phosphoinositide degeneration, and potassium channel mediation. Muscarinic receptors influence many effects of acetylcholine in the central and per…	chr11:46383791-46391668;chr11:46383791-46391776
g	G1	14982	1133	H. sapiens	1133	H. sapiens	CHRM5	HM5	protein-coding	cholinergic receptor muscarinic 5	The muscarinic cholinergic receptors belong to a larger family of G protein-coupled receptors. The functional diversity of these receptors is defined by the binding of acetylcholine and includes cellular responses such as adenylate cyclase inhibition, phosphoinositide degeneration, and potassium channel mediation. Muscarinic receptors influence many effects of acetylcholine in the central and per…	chr15:33968497-34067458
g	G1	14982	1233	H. sapiens	1233	H. sapiens	CCR4	CC-CKR-4|CD194|CKR4|CMKBR4|ChemR13|HGCN:14099|K5-5	protein-coding	C-C motif chemokine receptor 4	The protein encoded by this gene belongs to the G-protein-coupled receptor family . It is a receptor for the CC chemokine - MIP-1, RANTES, TARC and MCP-1. Chemokines are a group of small polypeptide, structurally related molecules that regulate cell trafficking of various types of leukocytes. The chemokines also play fundamental roles in the development, homeostasis, and function of the immune sy…	chr3:32951644-32956347
g	G1	14982	1234	H. sapiens	1234	H. sapiens	CCR5	CC-CKR-5|CCCKR5|CCR-5|CD195|CKR-5|CKR5|CMKBR5|IDDM22	protein-coding	C-C motif chemokine receptor 5 (gene/pseudogene)	This gene encodes a member of the beta chemokine receptor family, which is predicted to be a seven transmembrane protein similar to G protein-coupled receptors. This protein is expressed by T cells and macrophages, and is known to be an important co-receptor for macrophage-tropic virus, including HIV, to enter host cells. Defective alleles of this gene have been associated with the HIV infection …	chr3:46370142-46376206
g	G1	14982	1244	H. sapiens	1244	H. sapiens	ABCC2	ABC30|CMOAT|DJS|MRP2|cMRP	protein-coding	ATP binding cassette subfamily C member 2	The protein encoded by this gene is a member of the superfamily of ATP-binding cassette (ABC) transporters. ABC proteins transport various molecules across extra- and intra-cellular membranes. ABC genes are divided into seven distinct subfamilies (ABC1, MDR/TAP, MRP, ALD, OABP, GCN20, White). This protein is a member of the MRP subfamily which is involved in multi-drug resistance. This protein is…	chr10:99782640-99852594
am	AM1	5281426	1244	H. sapiens	1244	H. sapiens	ABCC2	ABC30|CMOAT|DJS|MRP2|cMRP	protein-coding	ATP binding cassette subfamily C member 2	The protein encoded by this gene is a member of the superfamily of ATP-binding cassette (ABC) transporters. ABC proteins transport various molecules across extra- and intra-cellular membranes. ABC genes are divided into seven distinct subfamilies (ABC1, MDR/TAP, MRP, ALD, OABP, GCN20, White). This protein is a member of the MRP subfamily which is involved in multi-drug resistance. This protein is…	chr10:99782640-99852594
g	G1	14982	1268	H. sapiens	1268	H. sapiens	CNR1	CANN6|CB-R|CB1|CB1A|CB1K5|CB1R|CNR	protein-coding	cannabinoid receptor 1	This gene encodes one of two cannabinoid receptors. The cannabinoids, principally delta-9-tetrahydrocannabinol and synthetic analogs, are psychoactive ingredients of marijuana. The cannabinoid receptors are members of the guanine-nucleotide-binding protein (G-protein) coupled receptor family, which inhibit adenylate cyclase activity in a dose-dependent, stereoselective and pertussis toxin-sensiti…	chr6:88139866-88166347;chr6:88139866-88166652;chr6:88139866-88145337;chr6:88139866-88167349;chr6:88139866-88163023
b	B3	44202892	1393	H. sapiens	1393	H. sapiens	CRHBP	CRF-BP|CRFBP	protein-coding	corticotropin releasing hormone binding protein	Corticotropin-releasing hormone is a potent stimulator of synthesis and secretion of preopiomelanocortin-derived peptides. Although CRH concentrations in the human peripheral circulation are normally low, they increase throughout pregnancy and fall rapidly after parturition. Maternal plasma CRH probably originates from the placenta. Human plasma contains a CRH-binding protein which inactivates CR…	chr5:76953045-76969471
b	B3	44202892	1395	H. sapiens	1395	H. sapiens	CRHR2	CRF-RB|CRF2|CRFR2|HM-CRF	protein-coding	corticotropin releasing hormone receptor 2	The protein encoded by this gene belongs to the G-protein coupled receptor 2 family, and the subfamily of corticotropin releasing hormone receptor. This receptor shows high affinity for corticotropin releasing hormone (CRH), and also binds CRH-related peptides such as urocortin. CRH is synthesized in the hypothalamus, and plays an important role in coordinating the endocrine, autonomic, and behav…	chr7:30651943-30700103;chr7:30651943-30682525;chr7:30651942-30682456
g	G1	14982	1432	H. sapiens	1432	H. sapiens	MAPK14	CSBP|CSBP1|CSBP2|CSPB1|EXIP|Mxi2|PRKM14|PRKM15|RK|SAPK2A|p38|p38ALPHA	protein-coding	mitogen-activated protein kinase 14	The protein encoded by this gene is a member of the MAP kinase family. MAP kinases act as an integration point for multiple biochemical signals, and are involved in a wide variety of cellular processes such as proliferation, differentiation, transcription regulation and development. This kinase is activated by various environmental stresses and proinflammatory cytokines. The activation requires i…	chr6:36027677-36111236;chr6:36027808-36102764
g	G1	14982	1511	H. sapiens	1511	H. sapiens	CTSG	CATG|CG	protein-coding	cathepsin G	The protein encoded by this gene, a member of the peptidase S1 protein family, is found in azurophil granules of neutrophilic polymorphonuclear leukocytes. The encoded protease has a specificity similar to that of chymotrypsin C, and may participate in the killing and digestion of engulfed pathogens, and in connective tissue remodeling at sites of inflammation. In addition, the encoded protein is…	chr14:24573518-24576250
g	G4	5280378	1543	H. sapiens	1543	H. sapiens	CYP1A1	AHH|AHRR|CP11|CYP1|CYPIA1|P1-450|P450-C|P450DX	protein-coding	cytochrome P450 family 1 subfamily A member 1	This gene, CYP1A1, encodes a member of the cytochrome P450 superfamily of enzymes. The cytochrome P450 proteins are monooxygenases which catalyze many reactions involved in drug metabolism and synthesis of cholesterol, steroids and other lipids. This protein localizes to the endoplasmic reticulum and its expression is induced by some polycyclic aromatic hydrocarbons (PAHs), some of which are foun…	chr15:74719542-74725528
g	G1	14982	1544	H. sapiens	1544	H. sapiens	CYP1A2	CP12|CYPIA2|P3-450|P450(PA)	protein-coding	cytochrome P450 family 1 subfamily A member 2	This gene encodes a member of the cytochrome P450 superfamily of enzymes. The cytochrome P450 proteins are monooxygenases which catalyze many reactions involved in drug metabolism and synthesis of cholesterol, steroids and other lipids. The protein encoded by this gene localizes to the endoplasmic reticulum and its expression is induced by some polycyclic aromatic hydrocarbons (PAHs), some of whi…	chr15:74748845-74756607
g	G4	5280378	1544	H. sapiens	1544	H. sapiens	CYP1A2	CP12|CYPIA2|P3-450|P450(PA)	protein-coding	cytochrome P450 family 1 subfamily A member 2	This gene encodes a member of the cytochrome P450 superfamily of enzymes. The cytochrome P450 proteins are monooxygenases which catalyze many reactions involved in drug metabolism and synthesis of cholesterol, steroids and other lipids. The protein encoded by this gene localizes to the endoplasmic reticulum and its expression is induced by some polycyclic aromatic hydrocarbons (PAHs), some of whi…	chr15:74748845-74756607
g	G1	14982	1548	H. sapiens	1548	H. sapiens	CYP2A6	CPA6|CYP2A|CYP2A3|CYPIIA6|P450C2A|P450PB	protein-coding	cytochrome P450 family 2 subfamily A member 6	This gene, CYP2A6, encodes a member of the cytochrome P450 superfamily of enzymes. The cytochrome P450 proteins are monooxygenases which catalyze many reactions involved in drug metabolism and synthesis of cholesterol, steroids and other lipids. This protein localizes to the endoplasmic reticulum and its expression is induced by phenobarbital. The enzyme is known to hydroxylate coumarin, and also…	chr19:40843541-40850447
g	G1	14982	1557	H. sapiens	1557	H. sapiens	CYP2C19	CPCJ|CYP2C|CYPIIC17|CYPIIC19|P450C2C|P450IIC19	protein-coding	cytochrome P450 family 2 subfamily C member 19	This gene encodes a member of the cytochrome P450 superfamily of enzymes. The cytochrome P450 proteins are monooxygenases which catalyze many reactions involved in drug metabolism and synthesis of cholesterol, steroids and other lipids. This protein localizes to the endoplasmic reticulum and is known to metabolize many xenobiotics, including the anticonvulsive drug mephenytoin, omeprazole, diazep…	chr10:94762681-94855547
g	G4	5280378	1557	H. sapiens	1557	H. sapiens	CYP2C19	CPCJ|CYP2C|CYPIIC17|CYPIIC19|P450C2C|P450IIC19	protein-coding	cytochrome P450 family 2 subfamily C member 19	This gene encodes a member of the cytochrome P450 superfamily of enzymes. The cytochrome P450 proteins are monooxygenases which catalyze many reactions involved in drug metabolism and synthesis of cholesterol, steroids and other lipids. This protein localizes to the endoplasmic reticulum and is known to metabolize many xenobiotics, including the anticonvulsive drug mephenytoin, omeprazole, diazep…	chr10:94762681-94855547
g	G1	14982	1559	H. sapiens	1559	H. sapiens	CYP2C9	CPC9|CYP2C|CYP2C10|CYPIIC9|P450IIC9	protein-coding	cytochrome P450 family 2 subfamily C member 9	This gene encodes a member of the cytochrome P450 superfamily of enzymes. The cytochrome P450 proteins are monooxygenases which catalyze many reactions involved in drug metabolism and synthesis of cholesterol, steroids and other lipids. This protein localizes to the endoplasmic reticulum and its expression is induced by rifampin. The enzyme is known to metabolize many xenobiotics, including pheny…	chr10:94938658-94990091
g	G1	14982	1565	H. sapiens	1565	H. sapiens	CYP2D6	CPD6|CYP2D|CYP2D7AP|CYP2D7BP|CYP2D7P2|CYP2D8P2|CYP2DL1|CYPIID6|P450-DB1|P450C2D|P450DB1	protein-coding	cytochrome P450 family 2 subfamily D member 6	This gene encodes a member of the cytochrome P450 superfamily of enzymes. The cytochrome P450 proteins are monooxygenases which catalyze many reactions involved in drug metabolism and synthesis of cholesterol, steroids and other lipids. This protein localizes to the endoplasmic reticulum and is known to metabolize as many as 25% of commonly prescribed drugs. Its substrates include antidepressants…	chr22_KN196486v1_alt:12065-16376;chr22_KI270928v1_alt:48840-53151;chr22:42126499-42130810;chr22_KQ458388v1_alt:20088-24399;chr22_KQ458387v1_alt:42476-46667;chr22_KQ759761v1_alt:4240-8551;chr22_KB663609v1_alt:48826-53137
g	G4	5280378	1565	H. sapiens	1565	H. sapiens	CYP2D6	CPD6|CYP2D|CYP2D7AP|CYP2D7BP|CYP2D7P2|CYP2D8P2|CYP2DL1|CYPIID6|P450-DB1|P450C2D|P450DB1	protein-coding	cytochrome P450 family 2 subfamily D member 6	This gene encodes a member of the cytochrome P450 superfamily of enzymes. The cytochrome P450 proteins are monooxygenases which catalyze many reactions involved in drug metabolism and synthesis of cholesterol, steroids and other lipids. This protein localizes to the endoplasmic reticulum and is known to metabolize as many as 25% of commonly prescribed drugs. Its substrates include antidepressants…	chr22_KN196486v1_alt:12065-16376;chr22_KI270928v1_alt:48840-53151;chr22:42126499-42130810;chr22_KQ458388v1_alt:20088-24399;chr22_KQ458387v1_alt:42476-46667;chr22_KQ759761v1_alt:4240-8551;chr22_KB663609v1_alt:48826-53137
g	G1	14982	1571	H. sapiens	1571	H. sapiens	CYP2E1	CPE1|CYP2E|P450-J|P450C2E	protein-coding	cytochrome P450 family 2 subfamily E member 1	This gene encodes a member of the cytochrome P450 superfamily of enzymes. The cytochrome P450 proteins are monooxygenases which catalyze many reactions involved in drug metabolism and synthesis of cholesterol, steroids and other lipids. This protein localizes to the endoplasmic reticulum and is induced by ethanol, the diabetic state, and starvation. The enzyme metabolizes both endogenous substrat…	chr10:133527363-133539123
g	G1	14982	1576	H. sapiens	1576	H. sapiens	CYP3A4	CP33|CP34|CYP3A|CYP3A3|CYPIIIA3|CYPIIIA4|HLP|NF-25|P450C3|P450PCN1	protein-coding	cytochrome P450 family 3 subfamily A member 4	This gene encodes a member of the cytochrome P450 superfamily of enzymes. The cytochrome P450 proteins are monooxygenases that catalyze many reactions involved in drug metabolism and synthesis of cholesterol, steroids and other lipids. This protein localizes to the endoplasmic reticulum and its expression is induced by glucocorticoids and some pharmacological agents. This enzyme is involved in th…	chr7:99756967-99784184
g	G4	5280378	1576	H. sapiens	1576	H. sapiens	CYP3A4	CP33|CP34|CYP3A|CYP3A3|CYPIIIA3|CYPIIIA4|HLP|NF-25|P450C3|P450PCN1	protein-coding	cytochrome P450 family 3 subfamily A member 4	This gene encodes a member of the cytochrome P450 superfamily of enzymes. The cytochrome P450 proteins are monooxygenases that catalyze many reactions involved in drug metabolism and synthesis of cholesterol, steroids and other lipids. This protein localizes to the endoplasmic reticulum and its expression is induced by glucocorticoids and some pharmacological agents. This enzyme is involved in th…	chr7:99756967-99784184
g	G3	5282073	1576	H. sapiens	1576	H. sapiens	CYP3A4	CP33|CP34|CYP3A|CYP3A3|CYPIIIA3|CYPIIIA4|HLP|NF-25|P450C3|P450PCN1	protein-coding	cytochrome P450 family 3 subfamily A member 4	This gene encodes a member of the cytochrome P450 superfamily of enzymes. The cytochrome P450 proteins are monooxygenases that catalyze many reactions involved in drug metabolism and synthesis of cholesterol, steroids and other lipids. This protein localizes to the endoplasmic reticulum and its expression is induced by glucocorticoids and some pharmacological agents. This enzyme is involved in th…	chr7:99756967-99784184
g	G1	14982	1588	H. sapiens	1588	H. sapiens	CYP19A1	ARO|ARO1|CPV1|CYAR|CYP19|CYPXIX|P-450AROM	protein-coding	cytochrome P450 family 19 subfamily A member 1	This gene encodes a member of the cytochrome P450 superfamily of enzymes. The cytochrome P450 proteins are monooxygenases which catalyze many reactions involved in drug metabolism and synthesis of cholesterol, steroids and other lipids. This protein localizes to the endoplasmic reticulum and catalyzes the last steps of estrogen biosynthesis. Mutations in this gene can result in either increased o…	chr15:51208057-51338596;chr15:51208057-51278142;chr15:51208057-51243915;chr15:51208057-51255789;chr15:51208057-51243029;chr15:51208057-51243245;chr15:51208057-51323924;chr15:51208057-51282262;chr15:51208057-51318497;chr15:51208057-51288338
g	G4	5280378	1588	H. sapiens	1588	H. sapiens	CYP19A1	ARO|ARO1|CPV1|CYAR|CYP19|CYPXIX|P-450AROM	protein-coding	cytochrome P450 family 19 subfamily A member 1	This gene encodes a member of the cytochrome P450 superfamily of enzymes. The cytochrome P450 proteins are monooxygenases which catalyze many reactions involved in drug metabolism and synthesis of cholesterol, steroids and other lipids. This protein localizes to the endoplasmic reticulum and catalyzes the last steps of estrogen biosynthesis. Mutations in this gene can result in either increased o…	chr15:51208057-51338596;chr15:51208057-51278142;chr15:51208057-51243915;chr15:51208057-51255789;chr15:51208057-51243029;chr15:51208057-51243245;chr15:51208057-51323924;chr15:51208057-51282262;chr15:51208057-51318497;chr15:51208057-51288338
g	G3	5282073	1588	H. sapiens	1588	H. sapiens	CYP19A1	ARO|ARO1|CPV1|CYAR|CYP19|CYPXIX|P-450AROM	protein-coding	cytochrome P450 family 19 subfamily A member 1	This gene encodes a member of the cytochrome P450 superfamily of enzymes. The cytochrome P450 proteins are monooxygenases which catalyze many reactions involved in drug metabolism and synthesis of cholesterol, steroids and other lipids. This protein localizes to the endoplasmic reticulum and catalyzes the last steps of estrogen biosynthesis. Mutations in this gene can result in either increased o…	chr15:51208057-51338596;chr15:51208057-51278142;chr15:51208057-51243915;chr15:51208057-51255789;chr15:51208057-51243029;chr15:51208057-51243245;chr15:51208057-51323924;chr15:51208057-51282262;chr15:51208057-51318497;chr15:51208057-51288338
g	G1	14982	1812	H. sapiens	1812	H. sapiens	DRD1	DADR|DRD1A	protein-coding	dopamine receptor D1	This gene encodes the D1 subtype of the dopamine receptor. The D1 subtype is the most abundant dopamine receptor in the central nervous system. This G-protein coupled receptor stimulates adenylyl cyclase and activates cyclic AMP-dependent protein kinases. D1 receptors regulate neuronal growth and development, mediate some behavioral responses, and modulate dopamine receptor D2-mediated events. Al…	chr5:175440036-175444182
g	G1	14982	1813	H. sapiens	1813	H. sapiens	DRD2	D2DR|D2R	protein-coding	dopamine receptor D2	This gene encodes the D2 subtype of the dopamine receptor. This G-protein coupled receptor inhibits adenylyl cyclase activity. A missense mutation in this gene causes myoclonus dystonia; other mutations have been associated with schizophrenia. Alternative splicing of this gene results in two transcript variants encoding different isoforms. A third variant has been described, but it has not been d…	chr11:113409595-113475279;chr11:113409605-113475398
g	G1	14982	1814	H. sapiens	1814	H. sapiens	DRD3	D3DR|ETM1|FET1	protein-coding	dopamine receptor D3	This gene encodes the D3 subtype of the five (D1-D5) dopamine receptors. The activity of the D3 subtype receptor is mediated by G proteins which inhibit adenylyl cyclase. This receptor is localized to the limbic areas of the brain, which are associated with cognitive, emotional, and endocrine functions. Genetic variation in this gene may be associated with susceptibility to hereditary essential t…	chr3:114128652-114178776;chr3:114128652-114179052;chr3:114128652-114199407;chr3:114127580-114179052
m	M3	8768	1814	H. sapiens	1814	H. sapiens	DRD3	D3DR|ETM1|FET1	protein-coding	dopamine receptor D3	This gene encodes the D3 subtype of the five (D1-D5) dopamine receptors. The activity of the D3 subtype receptor is mediated by G proteins which inhibit adenylyl cyclase. This receptor is localized to the limbic areas of the brain, which are associated with cognitive, emotional, and endocrine functions. Genetic variation in this gene may be associated with susceptibility to hereditary essential t…	chr3:114128652-114178776;chr3:114128652-114179052;chr3:114128652-114199407;chr3:114127580-114179052
g	G1	14982	1815	H. sapiens	1815	H. sapiens	DRD4	D4DR	protein-coding	dopamine receptor D4	This gene encodes the D4 subtype of the dopamine receptor. The D4 subtype is a G-protein coupled receptor which inhibits adenylyl cyclase. It is a target for drugs which treat schizophrenia and Parkinson disease. Mutations in this gene have been associated with various behavioral phenotypes, including autonomic nervous system dysfunction, attention deficit/hyperactivity disorder, and the personal…	chr11:637269-640705;chr11_KI270832v1_alt:167142-170576
g	G1	14982	1909	H. sapiens	1909	H. sapiens	EDNRA	ET-A|ETA|ETA-R|ETAR|ETRA|MFDA|hET-AR	protein-coding	endothelin receptor type A	This gene encodes the receptor for endothelin-1, a peptide that plays a role in potent and long-lasting vasoconstriction. This receptor associates with guanine-nucleotide-binding (G) proteins, and this coupling activates a phosphatidylinositol-calcium second messenger system. Polymorphisms in this gene have been linked to migraine headache resistance. Alternative splicing results in multiple tran…	chr4:147480917-147544954;chr4:147481097-147544954;chr4:147481097-147527550
g	G1	14982	1956	H. sapiens	1956	H. sapiens	EGFR	ERBB|ERBB1|HER1|NISBD2|PIG61|mENA	protein-coding	epidermal growth factor receptor	The protein encoded by this gene is a transmembrane glycoprotein that is a member of the protein kinase superfamily. This protein is a receptor for members of the epidermal growth factor family. EGFR is a cell surface protein that binds to epidermal growth factor. Binding of the protein to a ligand induces receptor dimerization and tyrosine autophosphorylation and leads to cell proliferation. Mut…	chr7:55019021-55208080;chr7:55019017-55211628;chr7:55019017-55203076;chr7:55109839-55211628;chr7:55019017-55171037;chr7:55019032-55156951;chr7:55019017-55168635
g	G1	14982	1991	H. sapiens	1991	H. sapiens	ELANE	ELA2|GE|HLE|HNE|NE|PMN-E|SCN1	protein-coding	elastase, neutrophil expressed	Elastases form a subfamily of serine proteases that hydrolyze many proteins in addition to elastin. Humans have six elastase genes which encode structurally similar proteins. The encoded preproprotein is proteolytically processed to generate the active protease. Following activation, this protease hydrolyzes proteins within specialized neutrophil lysosomes, called azurophil granules, as well as p…	chr19:852303-856243;chr19_KI270868v1_alt:31190-35129
g	G1	14982	2064	H. sapiens	2064	H. sapiens	ERBB2	CD340|HER-2|HER-2/neu|HER2|MLN 19|NEU|NGL|TKR1	protein-coding	erb-b2 receptor tyrosine kinase 2	This gene encodes a member of the epidermal growth factor (EGF) receptor family of receptor tyrosine kinases. This protein has no ligand binding domain of its own and therefore cannot bind growth factors. However, it does bind tightly to other ligand-bound EGF receptor family members to form a heterodimer, stabilizing ligand binding and enhancing kinase-mediated activation of downstream signallin…	chr17:39699978-39728662;chr17:39688084-39728662;chr17:39688084-39717657
g	G1	14982	2099	H. sapiens	2099	H. sapiens	ESR1	ER|ESR|ESRA|ESTRR|Era|NR3A1	protein-coding	estrogen receptor 1	This gene encodes an estrogen receptor, a ligand-activated transcription factor composed of several domains important for hormone binding, DNA binding, and activation of transcription. The protein localizes to the nucleus where it may form a homodimer or a heterodimer with estrogen receptor 2. Estrogen and its receptors are essential for sexual development and reproductive function, but also play…	chr6:151690496-152103273;chr6:151807319-152103273;chr6:151809107-152129613;chr6:151805673-152103273;chr6:151807682-152103273
g	G4	5280378	2099	H. sapiens	2099	H. sapiens	ESR1	ER|ESR|ESRA|ESTRR|Era|NR3A1	protein-coding	estrogen receptor 1	This gene encodes an estrogen receptor, a ligand-activated transcription factor composed of several domains important for hormone binding, DNA binding, and activation of transcription. The protein localizes to the nucleus where it may form a homodimer or a heterodimer with estrogen receptor 2. Estrogen and its receptors are essential for sexual development and reproductive function, but also play…	chr6:151690496-152103273;chr6:151807319-152103273;chr6:151809107-152129613;chr6:151805673-152103273;chr6:151807682-152103273
p	P2	15558591	2099	H. sapiens	2099	H. sapiens	ESR1	ER|ESR|ESRA|ESTRR|Era|NR3A1	protein-coding	estrogen receptor 1	This gene encodes an estrogen receptor, a ligand-activated transcription factor composed of several domains important for hormone binding, DNA binding, and activation of transcription. The protein localizes to the nucleus where it may form a homodimer or a heterodimer with estrogen receptor 2. Estrogen and its receptors are essential for sexual development and reproductive function, but also play…	chr6:151690496-152103273;chr6:151807319-152103273;chr6:151809107-152129613;chr6:151805673-152103273;chr6:151807682-152103273
g	G1	14982	2100	H. sapiens	2100	H. sapiens	ESR2	ER-BETA|ESR-BETA|ESRB|ESTRB|Erb|NR3A2|ODG8	protein-coding	estrogen receptor 2	This gene encodes a member of the family of estrogen receptors and superfamily of nuclear receptor transcription factors. The gene product contains an N-terminal DNA binding domain and C-terminal ligand binding domain and is localized to the nucleus, cytoplasm, and mitochondria. Upon binding to 17beta-estradiol or related ligands, the encoded protein forms homo- or hetero-dimers that interact wit…	chr14:64226707-64338613;chr14:64233029-64283075;chr14:64233029-64294410;chr14:64227033-64283075;chr14:64227033-64294410;chr14:64227818-64283075;chr14:64227033-64338550
g	G4	5280378	2100	H. sapiens	2100	H. sapiens	ESR2	ER-BETA|ESR-BETA|ESRB|ESTRB|Erb|NR3A2|ODG8	protein-coding	estrogen receptor 2	This gene encodes a member of the family of estrogen receptors and superfamily of nuclear receptor transcription factors. The gene product contains an N-terminal DNA binding domain and C-terminal ligand binding domain and is localized to the nucleus, cytoplasm, and mitochondria. Upon binding to 17beta-estradiol or related ligands, the encoded protein forms homo- or hetero-dimers that interact wit…	chr14:64226707-64338613;chr14:64233029-64283075;chr14:64233029-64294410;chr14:64227033-64283075;chr14:64227033-64294410;chr14:64227818-64283075;chr14:64227033-64338550
g	G4	5280378	2101	H. sapiens	2101	H. sapiens	ESRRA	ERR1|ERRa|ERRalpha|ESRL1|NR3B1	protein-coding	estrogen related receptor alpha	The protein encoded by this gene is a nuclear receptor that is most closely related to the estrogen receptor. This protein acts as a site-specific transcription factor and interacts with members of the PGC-1 family of transcription cofactors to regulate the expression of most genes involved in cellular energy production as well as in the process of mitochondrial biogenesis. A processed pseudogene…	chr11:64305528-64316740;chr11:64306227-64316740;chr11:64305524-64316740
m	M2	5315615	2139	H. sapiens	2139	H. sapiens	EYA2	EAB1	protein-coding	EYA transcriptional coactivator and phosphatase 2	This gene encodes a member of the eyes absent (EYA) family of proteins. The encoded protein may be post-translationally modified and may play a role in eye development. A similar protein in mice can act as a transcriptional activator. Alternative splicing results in multiple transcript variants, but the full-length natures of all of these variants have not yet been determined. [provided by RefSeq…	chr20:46894843-47188844;chr20:46894624-47188844
m	M2	5315615	2237	H. sapiens	2237	H. sapiens	FEN1	FEN-1|MF1|RAD2	protein-coding	flap structure-specific endonuclease 1	The protein encoded by this gene removes 5' overhanging flaps in DNA repair and processes the 5' ends of Okazaki fragments in lagging strand DNA synthesis. Direct physical interaction between this protein and AP endonuclease 1 during long-patch base excision repair provides coordinated loading of the proteins onto the substrate, thus passing the substrate from one enzyme to another. The protein i…	chr11:61792911-61797238
g	G1	14982	2321	H. sapiens	2321	H. sapiens	FLT1	FLT|FLT-1|VEGFR-1|VEGFR1	protein-coding	fms related receptor tyrosine kinase 1	This gene encodes a member of the vascular endothelial growth factor receptor (VEGFR) family. VEGFR family members are receptor tyrosine kinases (RTKs) which contain an extracellular ligand-binding region with seven immunoglobulin (Ig)-like domains, a transmembrane segment, and a tyrosine kinase (TK) domain within the cytoplasmic domain. This protein binds to VEGFR-A, VEGFR-B and placental growth…	chr13:28368092-28495128;chr13:28399044-28495128;chr13:28385549-28495128;chr13:28300346-28495128
g	G4	5280378	2516	H. sapiens	2516	H. sapiens	NR5A1	AD4BP|ELP|FTZ1|FTZF1|POF7|SF-1|SF1|SPGF8|SRXX4|SRXY3|hSF-1	protein-coding	nuclear receptor subfamily 5 group A member 1	The protein encoded by this gene is a transcriptional activator involved in sex determination. The encoded protein binds DNA as a monomer. Defects in this gene are a cause of XY sex reversal with or without adrenal failure as well as adrenocortical insufficiency without ovarian defect. [provided by RefSeq, Jul 2008]	chr9:124481236-124507399
g	G1	14982	2534	H. sapiens	2534	H. sapiens	FYN	SLK|SYN|p59-FYN	protein-coding	FYN proto-oncogene, Src family tyrosine kinase	This gene is a member of the protein-tyrosine kinase oncogene family. It encodes a membrane-associated tyrosine kinase that has been implicated in the control of cell growth. The protein associates with the p85 subunit of phosphatidylinositol 3-kinase and interacts with the fyn-binding protein. Alternatively spliced transcript variants encoding distinct isoforms exist. [provided by RefSeq, Jul 20…	chr6:111660332-111759917;chr6:111660332-111873071;chr6:111660332-111759131;chr6:111660332-111873452
m	M2	5281792	2534	H. sapiens	2534	H. sapiens	FYN	SLK|SYN|p59-FYN	protein-coding	FYN proto-oncogene, Src family tyrosine kinase	This gene is a member of the protein-tyrosine kinase oncogene family. It encodes a membrane-associated tyrosine kinase that has been implicated in the control of cell growth. The protein associates with the p85 subunit of phosphatidylinositol 3-kinase and interacts with the fyn-binding protein. Alternatively spliced transcript variants encoding distinct isoforms exist. [provided by RefSeq, Jul 20…	chr6:111660332-111759917;chr6:111660332-111873071;chr6:111660332-111759131;chr6:111660332-111873452
am	AM1	5281426	2548	H. sapiens	2548	H. sapiens	GAA	LYAG	protein-coding	glucosidase alpha, acid	This gene encodes lysosomal alpha-glucosidase, which is essential for the degradation of glycogen to glucose in lysosomes. The encoded preproprotein is proteolytically processed to generate multiple intermediate forms and the mature form of the enzyme. Defects in this gene are the cause of glycogen storage disease II, also known as Pompe's disease, which is an autosomal recessive disorder with a …	chr17:80101581-80102732;chr17:80101581-80119881
m	M2	5281792	2548	H. sapiens	2548	H. sapiens	GAA	LYAG	protein-coding	glucosidase alpha, acid	This gene encodes lysosomal alpha-glucosidase, which is essential for the degradation of glycogen to glucose in lysosomes. The encoded preproprotein is proteolytically processed to generate multiple intermediate forms and the mature form of the enzyme. Defects in this gene are the cause of glycogen storage disease II, also known as Pompe's disease, which is an autosomal recessive disorder with a …	chr17:80101581-80102732;chr17:80101581-80119881
m	M3	8768	2548	H. sapiens	2548	H. sapiens	GAA	LYAG	protein-coding	glucosidase alpha, acid	This gene encodes lysosomal alpha-glucosidase, which is essential for the degradation of glycogen to glucose in lysosomes. The encoded preproprotein is proteolytically processed to generate multiple intermediate forms and the mature form of the enzyme. Defects in this gene are the cause of glycogen storage disease II, also known as Pompe's disease, which is an autosomal recessive disorder with a …	chr17:80101581-80102732;chr17:80101581-80119881
m	M2	5315615	2548	H. sapiens	2548	H. sapiens	GAA	LYAG	protein-coding	glucosidase alpha, acid	This gene encodes lysosomal alpha-glucosidase, which is essential for the degradation of glycogen to glucose in lysosomes. The encoded preproprotein is proteolytically processed to generate multiple intermediate forms and the mature form of the enzyme. Defects in this gene are the cause of glycogen storage disease II, also known as Pompe's disease, which is an autosomal recessive disorder with a …	chr17:80101581-80102732;chr17:80101581-80119881
am	AM1	5281426	2597	H. sapiens	2597	H. sapiens	GAPDH	G3PD|GAPD|HEL-S-162eP	protein-coding	glyceraldehyde-3-phosphate dehydrogenase	This gene encodes a member of the glyceraldehyde-3-phosphate dehydrogenase protein family. The encoded protein has been identified as a moonlighting protein based on its ability to perform mechanistically distinct functions. The product of this gene catalyzes an important energy-yielding step in carbohydrate metabolism, the reversible oxidative phosphorylation of glyceraldehyde-3-phosphate in the…	chr12:6534517-6538371;chr12:6535264-6538371
m	M2	5281792	2597	H. sapiens	2597	H. sapiens	GAPDH	G3PD|GAPD|HEL-S-162eP	protein-coding	glyceraldehyde-3-phosphate dehydrogenase	This gene encodes a member of the glyceraldehyde-3-phosphate dehydrogenase protein family. The encoded protein has been identified as a moonlighting protein based on its ability to perform mechanistically distinct functions. The product of this gene catalyzes an important energy-yielding step in carbohydrate metabolism, the reversible oxidative phosphorylation of glyceraldehyde-3-phosphate in the…	chr12:6534517-6538371;chr12:6535264-6538371
am	AM1	5281426	2629	H. sapiens	2629	H. sapiens	GBA	GBA1|GCB|GLUC	protein-coding	glucosylceramidase beta	This gene encodes a lysosomal membrane protein that cleaves the beta-glucosidic linkage of glycosylceramide, an intermediate in glycolipid metabolism. Mutations in this gene cause Gaucher disease, a lysosomal storage disease characterized by an accumulation of glucocerebrosides. A related pseudogene is approximately 12 kb downstream of this gene on chromosome 1. Alternative splicing results in mu…	chr1_GL383519v1_alt:1-3339;chr1:155234452-155241249;chr1_GL383519v1_alt:1-2561;chr1_GL383519v1_alt:39475-49650;chr1_GL383519v1_alt:1-3426;chr1_GL383519v1_alt:39475-46272;chr1:155234452-155244627;chr1_GL383519v1_alt:1-3358
m	M2	5281792	2629	H. sapiens	2629	H. sapiens	GBA	GBA1|GCB|GLUC	protein-coding	glucosylceramidase beta	This gene encodes a lysosomal membrane protein that cleaves the beta-glucosidic linkage of glycosylceramide, an intermediate in glycolipid metabolism. Mutations in this gene cause Gaucher disease, a lysosomal storage disease characterized by an accumulation of glucocerebrosides. A related pseudogene is approximately 12 kb downstream of this gene on chromosome 1. Alternative splicing results in mu…	chr1_GL383519v1_alt:1-3339;chr1:155234452-155241249;chr1_GL383519v1_alt:1-2561;chr1_GL383519v1_alt:39475-49650;chr1_GL383519v1_alt:1-3426;chr1_GL383519v1_alt:39475-46272;chr1:155234452-155244627;chr1_GL383519v1_alt:1-3358
am	AM1	5281426	2648	H. sapiens	2648	H. sapiens	KAT2A	GCN5|GCN5L2|PCAF-b|hGCN5	protein-coding	lysine acetyltransferase 2A	KAT2A, or GCN5, is a histone acetyltransferase (HAT) that functions primarily as a transcriptional activator. It also functions as a repressor of NF-kappa-B (see MIM 164011) by promoting ubiquitination of the NF-kappa-B subunit RELA (MIM 164014) in a HAT-independent manner (Mao et al., 2009 [PubMed 19339690]).[supplied by OMIM, Sep 2009]	chr17:42113111-42121367
m	M2	5315615	2648	H. sapiens	2648	H. sapiens	KAT2A	GCN5|GCN5L2|PCAF-b|hGCN5	protein-coding	lysine acetyltransferase 2A	KAT2A, or GCN5, is a histone acetyltransferase (HAT) that functions primarily as a transcriptional activator. It also functions as a repressor of NF-kappa-B (see MIM 164011) by promoting ubiquitination of the NF-kappa-B subunit RELA (MIM 164014) in a HAT-independent manner (Mao et al., 2009 [PubMed 19339690]).[supplied by OMIM, Sep 2009]	chr17:42113111-42121367
m	M3	8768	2671	H. sapiens	2671	H. sapiens	GFER	ALR|ERV1|HERV1|HPO|HPO1|HPO2|HSS	protein-coding	growth factor, augmenter of liver regeneration	The hepatotrophic factor designated augmenter of liver regeneration (ALR) is thought to be one of the factors responsible for the extraordinary regenerative capacity of mammalian liver. It has also been called hepatic regenerative stimulation substance (HSS). The gene resides on chromosome 16 in the interval containing the locus for polycystic kidney disease (PKD1). The putative gene product is 4…	chr16:1984193-1987749
m	M2	5315615	2671	H. sapiens	2671	H. sapiens	GFER	ALR|ERV1|HERV1|HPO|HPO1|HPO2|HSS	protein-coding	growth factor, augmenter of liver regeneration	The hepatotrophic factor designated augmenter of liver regeneration (ALR) is thought to be one of the factors responsible for the extraordinary regenerative capacity of mammalian liver. It has also been called hepatic regenerative stimulation substance (HSS). The gene resides on chromosome 16 in the interval containing the locus for polycystic kidney disease (PKD1). The putative gene product is 4…	chr16:1984193-1987749
am	AM1	5281426	2717	H. sapiens	2717	H. sapiens	GLA	GALA	protein-coding	galactosidase alpha	This gene encodes a homodimeric glycoprotein that hydrolyses the terminal alpha-galactosyl moieties from glycolipids and glycoproteins. This enzyme predominantly hydrolyzes ceramide trihexoside, and it can catalyze the hydrolysis of melibiose into galactose and glucose. A variety of mutations in this gene affect the synthesis, processing, and stability of this enzyme, which causes Fabry disease, …	chrX:101397803-101407925
g	G3	5282073	2717	H. sapiens	2717	H. sapiens	GLA	GALA	protein-coding	galactosidase alpha	This gene encodes a homodimeric glycoprotein that hydrolyses the terminal alpha-galactosyl moieties from glycolipids and glycoproteins. This enzyme predominantly hydrolyzes ceramide trihexoside, and it can catalyze the hydrolysis of melibiose into galactose and glucose. A variety of mutations in this gene affect the synthesis, processing, and stability of this enzyme, which causes Fabry disease, …	chrX:101397803-101407925
g	G4	5280378	2737	H. sapiens	2737	H. sapiens	GLI3	ACLS|GCPS|GLI3-190|GLI3FL|PAP-A|PAPA|PAPA1|PAPB|PHS|PPDIV	protein-coding	GLI family zinc finger 3	This gene encodes a protein which belongs to the C2H2-type zinc finger proteins subclass of the Gli family. They are characterized as DNA-binding transcription factors and are mediators of Sonic hedgehog (Shh) signaling. The protein encoded by this gene localizes in the cytoplasm and activates patched Drosophila homolog (PTCH) gene expression. It is also thought to play a role during embryogenesi…	chr7:41960950-42237209
m	M3	8768	2744	H. sapiens	2744	H. sapiens	GLS	AAD20|CASGID|EIEE71|GAC|GAM|GDPAG|GLS1|KGA	protein-coding	glutaminase	This gene encodes the K-type mitochondrial glutaminase. The encoded protein is an phosphate-activated amidohydrolase that catalyzes the hydrolysis of glutamine to glutamate and ammonia. This protein is primarily expressed in the brain and kidney plays an essential role in generating energy for metabolism, synthesizing the brain neurotransmitter glutamate and maintaining acid-base balance in the k…	chr2:190880821-190935289;chr2:190880821-190965544
g	G4	5280378	2744	H. sapiens	2744	H. sapiens	GLS	AAD20|CASGID|EIEE71|GAC|GAM|GDPAG|GLS1|KGA	protein-coding	glutaminase	This gene encodes the K-type mitochondrial glutaminase. The encoded protein is an phosphate-activated amidohydrolase that catalyzes the hydrolysis of glutamine to glutamate and ammonia. This protein is primarily expressed in the brain and kidney plays an essential role in generating energy for metabolism, synthesizing the brain neurotransmitter glutamate and maintaining acid-base balance in the k…	chr2:190880821-190935289;chr2:190880821-190965544
m	M2	5315615	2744	H. sapiens	2744	H. sapiens	GLS	AAD20|CASGID|EIEE71|GAC|GAM|GDPAG|GLS1|KGA	protein-coding	glutaminase	This gene encodes the K-type mitochondrial glutaminase. The encoded protein is an phosphate-activated amidohydrolase that catalyzes the hydrolysis of glutamine to glutamate and ammonia. This protein is primarily expressed in the brain and kidney plays an essential role in generating energy for metabolism, synthesizing the brain neurotransmitter glutamate and maintaining acid-base balance in the k…	chr2:190880821-190935289;chr2:190880821-190965544
m	M2	5281792	2770	H. sapiens	2770	H. sapiens	GNAI1	Gi	protein-coding	G protein subunit alpha i1	Guanine nucleotide binding proteins are heterotrimeric signal-transducing molecules consisting of alpha, beta, and gamma subunits. The alpha subunit binds guanine nucleotide, can hydrolyze GTP, and can interact with other proteins. The protein encoded by this gene represents the alpha subunit of an inhibitory complex. The encoded protein is part of a complex that responds to beta-adrenergic signa…	chr7:80135784-80226180;chr7:80134831-80226180
m	M2	5281792	2775	H. sapiens	2775	H. sapiens	GNAO1	EIEE17|G-ALPHA-o|GNAO|HLA-DQB1|NEDIM	protein-coding	G protein subunit alpha o1	The protein encoded by this gene represents the alpha subunit of the Go heterotrimeric G-protein signal-transducing complex. Defects in this gene are a cause of early-onset epileptic encephalopathy. Two transcript variants encoding different isoforms have been found for this gene. [provided by RefSeq, Aug 2015]	chr16:56191489-56348199;chr16:56191489-56357444
m	M3	8768	2775	H. sapiens	2775	H. sapiens	GNAO1	EIEE17|G-ALPHA-o|GNAO|HLA-DQB1|NEDIM	protein-coding	G protein subunit alpha o1	The protein encoded by this gene represents the alpha subunit of the Go heterotrimeric G-protein signal-transducing complex. Defects in this gene are a cause of early-onset epileptic encephalopathy. Two transcript variants encoding different isoforms have been found for this gene. [provided by RefSeq, Aug 2015]	chr16:56191489-56348199;chr16:56191489-56357444
g	G2	3733033	2778	H. sapiens	2778	H. sapiens	GNAS	AHO|C20orf45|GNAS1|GPSA|GSA|GSP|NESP|PITA3|POH|SCG6|SgVI	protein-coding	GNAS complex locus	This locus has a highly complex imprinted expression pattern. It gives rise to maternally, paternally, and biallelically expressed transcripts that are derived from four alternative promoters and 5' exons. Some transcripts contain a differentially methylated region (DMR) at their 5' exons, and this DMR is commonly found in imprinted genes and correlates with transcript expression. An antisense tr…	chr20:58889180-58911188;chr20:58891421-58911188;chr20:58839748-58911188;chr20:58888413-58900499;chr20:58891421-58900499;chr20:58852981-58900499;chr20:58841620-58911188;chr20:58852981-58911196;chr20:58892163-58900499
g	G1	14982	2908	H. sapiens	2908	H. sapiens	NR3C1	GCCR|GCR|GCRST|GR|GRL	protein-coding	nuclear receptor subfamily 3 group C member 1	This gene encodes glucocorticoid receptor, which can function both as a transcription factor that binds to glucocorticoid response elements in the promoters of glucocorticoid responsive genes to activate their transcription, and as a regulator of other transcription factors. This receptor is typically found in the cytoplasm, but upon ligand binding, is transported into the nucleus. It is involved…	chr5:143277934-143403686;chr5:143277931-143435512;chr5:143277934-143405355;chr5:143293879-143403686;chr5:143277934-143404482;chr5:143277936-143403283;chr5:143277934-143434809;chr5:143277934-143404236
g	G4	5280378	2908	H. sapiens	2908	H. sapiens	NR3C1	GCCR|GCR|GCRST|GR|GRL	protein-coding	nuclear receptor subfamily 3 group C member 1	This gene encodes glucocorticoid receptor, which can function both as a transcription factor that binds to glucocorticoid response elements in the promoters of glucocorticoid responsive genes to activate their transcription, and as a regulator of other transcription factors. This receptor is typically found in the cytoplasm, but upon ligand binding, is transported into the nucleus. It is involved…	chr5:143277934-143403686;chr5:143277931-143435512;chr5:143277934-143405355;chr5:143293879-143403686;chr5:143277934-143404482;chr5:143277936-143403283;chr5:143277934-143434809;chr5:143277934-143404236
am	AM1	5281426	3028	H. sapiens	3028	H. sapiens	HSD17B10	17b-HSD10|ABAD|CAMR|DUPXp11.22|ERAB|HADH2|HCD2|HSD10MD|MHBD|MRPP2|MRX17|MRX31|MRXS10|SCHAD|SDR5C1	protein-coding	hydroxysteroid 17-beta dehydrogenase 10	This gene encodes 3-hydroxyacyl-CoA dehydrogenase type II, a member of the short-chain dehydrogenase/reductase superfamily. The gene product is a mitochondrial protein that catalyzes the oxidation of a wide variety of fatty acids and steroids, and is a subunit of mitochondrial ribonuclease P, which is involved in tRNA maturation. The protein has been implicated in the development of Alzheimer dis…	chrX:53431258-53434376;chrX:53431261-53434370
g	G4	5280378	3028	H. sapiens	3028	H. sapiens	HSD17B10	17b-HSD10|ABAD|CAMR|DUPXp11.22|ERAB|HADH2|HCD2|HSD10MD|MHBD|MRPP2|MRX17|MRX31|MRXS10|SCHAD|SDR5C1	protein-coding	hydroxysteroid 17-beta dehydrogenase 10	This gene encodes 3-hydroxyacyl-CoA dehydrogenase type II, a member of the short-chain dehydrogenase/reductase superfamily. The gene product is a mitochondrial protein that catalyzes the oxidation of a wide variety of fatty acids and steroids, and is a subunit of mitochondrial ribonuclease P, which is involved in tRNA maturation. The protein has been implicated in the development of Alzheimer dis…	chrX:53431258-53434376;chrX:53431261-53434370
m	M2	5315615	3028	H. sapiens	3028	H. sapiens	HSD17B10	17b-HSD10|ABAD|CAMR|DUPXp11.22|ERAB|HADH2|HCD2|HSD10MD|MHBD|MRPP2|MRX17|MRX31|MRXS10|SCHAD|SDR5C1	protein-coding	hydroxysteroid 17-beta dehydrogenase 10	This gene encodes 3-hydroxyacyl-CoA dehydrogenase type II, a member of the short-chain dehydrogenase/reductase superfamily. The gene product is a mitochondrial protein that catalyzes the oxidation of a wide variety of fatty acids and steroids, and is a subunit of mitochondrial ribonuclease P, which is involved in tRNA maturation. The protein has been implicated in the development of Alzheimer dis…	chrX:53431258-53434376;chrX:53431261-53434370
g	G3	5282073	3028	H. sapiens	3028	H. sapiens	HSD17B10	17b-HSD10|ABAD|CAMR|DUPXp11.22|ERAB|HADH2|HCD2|HSD10MD|MHBD|MRPP2|MRX17|MRX31|MRXS10|SCHAD|SDR5C1	protein-coding	hydroxysteroid 17-beta dehydrogenase 10	This gene encodes 3-hydroxyacyl-CoA dehydrogenase type II, a member of the short-chain dehydrogenase/reductase superfamily. The gene product is a mitochondrial protein that catalyzes the oxidation of a wide variety of fatty acids and steroids, and is a subunit of mitochondrial ribonuclease P, which is involved in tRNA maturation. The protein has been implicated in the development of Alzheimer dis…	chrX:53431258-53434376;chrX:53431261-53434370
g	G4	5280378	3064	H. sapiens	3064	H. sapiens	HTT	HD|IT15|LOMARS	protein-coding	huntingtin	Huntingtin is a disease gene linked to Huntington's disease, a neurodegenerative disorder characterized by loss of striatal neurons. This is thought to be caused by an expanded, unstable trinucleotide repeat in the huntingtin gene, which translates as a polyglutamine repeat in the protein product. A fairly broad range of trinucleotide repeats (9-35) has been identified in normal controls, and rep…	chr4:3074681-3243960
m	M2	5315615	3064	H. sapiens	3064	H. sapiens	HTT	HD|IT15|LOMARS	protein-coding	huntingtin	Huntingtin is a disease gene linked to Huntington's disease, a neurodegenerative disorder characterized by loss of striatal neurons. This is thought to be caused by an expanded, unstable trinucleotide repeat in the huntingtin gene, which translates as a polyglutamine repeat in the protein product. A fairly broad range of trinucleotide repeats (9-35) has been identified in normal controls, and rep…	chr4:3074681-3243960
g	G1	14982	3146	H. sapiens	3146	H. sapiens	HMGB1	HMG-1|HMG1|HMG3|SBP-1	protein-coding	high mobility group box 1	This gene encodes a protein that belongs to the High Mobility Group-box superfamily. The encoded non-histone, nuclear DNA-binding protein regulates transcription, and is involved in organization of DNA. This protein plays a role in several cellular processes, including inflammation, cell differentiation and tumor cell migration. Multiple pseudogenes of this gene have been identified. Alternative …	chr13:30456704-30617587;chr13:30457916-30464327;chr13:30457916-30617597;chr13:30456704-30465936;chr13:30457916-30465977;chr13:30456704-30465240
g	G1	14982	3156	H. sapiens	3156	H. sapiens	HMGCR	LDLCQ3	protein-coding	3-hydroxy-3-methylglutaryl-CoA reductase	HMG-CoA reductase is the rate-limiting enzyme for cholesterol synthesis and is regulated via a negative feedback mechanism mediated by sterols and non-sterol metabolites derived from mevalonate, the product of the reaction catalyzed by reductase. Normally in mammalian cells this enzyme is suppressed by cholesterol derived from the internalization and degradation of low density lipoprotein (LDL) v…	chr5:75337168-75362116;chr5:75337220-75362101;chr5:75337168-75362101
am	AM1	5281426	3248	H. sapiens	3248	H. sapiens	HPGD	15-PGDH|PGDH|PGDH1|PHOAR1|SDR36C1	protein-coding	15-hydroxyprostaglandin dehydrogenase	This gene encodes a member of the short-chain nonmetalloenzyme alcohol dehydrogenase protein family. The encoded enzyme is responsible for the metabolism of prostaglandins, which function in a variety of physiologic and cellular processes such as inflammation. Mutations in this gene result in primary autosomal recessive hypertrophic osteoarthropathy and cranioosteoarthropathy. Multiple transcript…	chr4:174490177-174522893;chr4:174490177-174522898;chr4:174506743-174522488;chr4:174490175-174522488
g	G4	5280378	3248	H. sapiens	3248	H. sapiens	HPGD	15-PGDH|PGDH|PGDH1|PHOAR1|SDR36C1	protein-coding	15-hydroxyprostaglandin dehydrogenase	This gene encodes a member of the short-chain nonmetalloenzyme alcohol dehydrogenase protein family. The encoded enzyme is responsible for the metabolism of prostaglandins, which function in a variety of physiologic and cellular processes such as inflammation. Mutations in this gene result in primary autosomal recessive hypertrophic osteoarthropathy and cranioosteoarthropathy. Multiple transcript…	chr4:174490177-174522893;chr4:174490177-174522898;chr4:174506743-174522488;chr4:174490175-174522488
m	M2	5315615	3248	H. sapiens	3248	H. sapiens	HPGD	15-PGDH|PGDH|PGDH1|PHOAR1|SDR36C1	protein-coding	15-hydroxyprostaglandin dehydrogenase	This gene encodes a member of the short-chain nonmetalloenzyme alcohol dehydrogenase protein family. The encoded enzyme is responsible for the metabolism of prostaglandins, which function in a variety of physiologic and cellular processes such as inflammation. Mutations in this gene result in primary autosomal recessive hypertrophic osteoarthropathy and cranioosteoarthropathy. Multiple transcript…	chr4:174490177-174522893;chr4:174490177-174522898;chr4:174506743-174522488;chr4:174490175-174522488
g	G3	5282073	3248	H. sapiens	3248	H. sapiens	HPGD	15-PGDH|PGDH|PGDH1|PHOAR1|SDR36C1	protein-coding	15-hydroxyprostaglandin dehydrogenase	This gene encodes a member of the short-chain nonmetalloenzyme alcohol dehydrogenase protein family. The encoded enzyme is responsible for the metabolism of prostaglandins, which function in a variety of physiologic and cellular processes such as inflammation. Mutations in this gene result in primary autosomal recessive hypertrophic osteoarthropathy and cranioosteoarthropathy. Multiple transcript…	chr4:174490177-174522893;chr4:174490177-174522898;chr4:174506743-174522488;chr4:174490175-174522488
g	G1	14982	3269	H. sapiens	3269	H. sapiens	HRH1	H1-R|H1R|HH1R|hisH1	protein-coding	histamine receptor H1	Histamine is a ubiquitous messenger molecule released from mast cells, enterochromaffin-like cells, and neurons. Its various actions are mediated by histamine receptors H1, H2, H3 and H4. The protein encoded by this gene is an integral membrane protein and belongs to the G protein-coupled receptor superfamily. It mediates the contraction of smooth muscles, the increase in capillary permeability d…	chr3:11137238-11263557;chr3:11154493-11263557;chr3:11252699-11263253;chr3:11225981-11263557
g	G1	14982	3274	H. sapiens	3274	H. sapiens	HRH2	H2R|HH2R	protein-coding	histamine receptor H2	Histamine is a ubiquitous messenger molecule released from mast cells, enterochromaffin-like cells, and neurons. Its various actions are mediated by histamine receptors H1, H2, H3 and H4. Histamine receptor H2 belongs to the family 1 of G protein-coupled receptors. It is an integral membrane protein and stimulates gastric acid secretion. It also regulates gastrointestinal motility and intestinal …	chr5:175658071-175686242;chr5:175658071-175710756
g	G1	14982	3290	H. sapiens	3290	H. sapiens	HSD11B1	11-DH|11-beta-HSD1|CORTRD2|HDL|HSD11|HSD11B|HSD11L|SDR26C1	protein-coding	hydroxysteroid 11-beta dehydrogenase 1	The protein encoded by this gene is a microsomal enzyme that catalyzes the conversion of the stress hormone cortisol to the inactive metabolite cortisone. In addition, the encoded protein can catalyze the reverse reaction, the conversion of cortisone to cortisol. Too much cortisol can lead to central obesity, and a particular variation in this gene has been associated with obesity and insulin res…	chr1:209686180-209734950;chr1:209704846-209734928
g	G1	14982	3291	H. sapiens	3291	H. sapiens	HSD11B2	AME|AME1|HSD11K|HSD2|SDR9C3	protein-coding	hydroxysteroid 11-beta dehydrogenase 2	There are at least two isozymes of the corticosteroid 11-beta-dehydrogenase, a microsomal enzyme complex responsible for the interconversion of cortisol and cortisone. The type I isozyme has both 11-beta-dehydrogenase (cortisol to cortisone) and 11-oxoreductase (cortisone to cortisol) activities. The type II isozyme, encoded by this gene, has only 11-beta-dehydrogenase activity. In aldosterone-se…	chr16:67431121-67437551
am	AM1	5281426	3291	H. sapiens	3291	H. sapiens	HSD11B2	AME|AME1|HSD11K|HSD2|SDR9C3	protein-coding	hydroxysteroid 11-beta dehydrogenase 2	There are at least two isozymes of the corticosteroid 11-beta-dehydrogenase, a microsomal enzyme complex responsible for the interconversion of cortisol and cortisone. The type I isozyme has both 11-beta-dehydrogenase (cortisol to cortisone) and 11-oxoreductase (cortisone to cortisol) activities. The type II isozyme, encoded by this gene, has only 11-beta-dehydrogenase activity. In aldosterone-se…	chr16:67431121-67437551
g	G4	5280378	3309	H. sapiens	3309	H. sapiens	HSPA5	BIP|GRP78|HEL-S-89n|MIF2	protein-coding	heat shock protein family A (Hsp70) member 5	The protein encoded by this gene is a member of the heat shock protein 70 (HSP70) family. It is localized in the lumen of the endoplasmic reticulum (ER), and is involved in the folding and assembly of proteins in the ER. As this protein interacts with many ER proteins, it may play a key role in monitoring protein transport through the cell.[provided by RefSeq, Sep 2010]	chr9:125234853-125241343
z	Z1	442793	3350	H. sapiens	3350	H. sapiens	HTR1A	5-HT-1A|5-HT1A|5HT1a|ADRB2RL1|ADRBRL1|G-21|PFMCD	protein-coding	5-hydroxytryptamine receptor 1A	This gene encodes a G protein-coupled receptor for 5-hydroxytryptamine (serotonin), and belongs to the 5-hydroxytryptamine receptor subfamily. Serotonin has been implicated in a number of physiologic processes and pathologic conditions. Inactivation of this gene in mice results in behavior consistent with an increased anxiety and stress response. Mutation in the promoter of this gene has been ass…	chr5:63957876-63962445
g	G1	14982	3356	H. sapiens	3356	H. sapiens	HTR2A	5-HT2A|HTR2	protein-coding	5-hydroxytryptamine receptor 2A	This gene encodes one of the receptors for serotonin, a neurotransmitter with many roles. Mutations in this gene are associated with susceptibility to schizophrenia and obsessive-compulsive disorder, and are also associated with response to the antidepressant citalopram in patients with major depressive disorder (MDD). MDD patients who also have a mutation in intron 2 of this gene show a signific…	chr13:46831542-46897076
g	G1	14982	3357	H. sapiens	3357	H. sapiens	HTR2B	5-HT(2B)|5-HT-2B|5-HT2B	protein-coding	5-hydroxytryptamine receptor 2B	This gene encodes one of the several different receptors for 5-hydroxytryptamine (serotonin) that belongs to the G-protein coupled receptor 1 family. Serotonin is a biogenic hormone that functions as a neurotransmitter, a hormone, and a mitogen. Serotonin receptors mediate many of the central and peripheral physiologic functions of serotonin, including regulation of cardiovascular functions and i…	chr2:231108230-231125042
g	G1	14982	3358	H. sapiens	3358	H. sapiens	HTR2C	5-HT1C|5-HT2C|5-HTR2C|5HTR2C|HTR1C	protein-coding	5-hydroxytryptamine receptor 2C	This gene encodes a seven-transmembrane G-protein-coupled receptor. The encoded protein responds to signaling through the neurotransmitter serotonin. The mRNA of this gene is subject to multiple RNA editing events, where adenosine residues encoded by the genome are converted to inosines. RNA editing is predicted to alter the structure of the second intracellular loop, thereby generating alternate…	chrX:114584078-114910061
g	G1	14982	3362	H. sapiens	3362	H. sapiens	HTR6	5-HT6|5-HT6R	protein-coding	5-hydroxytryptamine receptor 6	This gene encodes a protein that belongs to the seven-transmembrane G protein-coupled receptor family of proteins. The encoded protein couples with the Gs alpha subunit and stimulates adenylate cyclase to activate the cyclic AMP-dependent signaling pathway. This receptor is thought to regulate cholinergic neuronal transmission in the brain. Several antidepressants and antipsychotic drugs have a h…	chr1:19664875-19680966
a	A3	5319022	3363	H. sapiens	3363	H. sapiens	HTR7	5-HT7	protein-coding	5-hydroxytryptamine receptor 7	The neurotransmitter, serotonin, is thought to play a role in various cognitive and behavioral functions. The serotonin receptor encoded by this gene belongs to the superfamily of G protein-coupled receptors and the gene is a candidate locus for involvement in autistic disorder and other neuropsychiatric disorders. Three splice variants have been identified which encode proteins that differ in th…	chr10:90740823-90858039
m	M2	5281792	3373	H. sapiens	3373	H. sapiens	HYAL1	HYAL-1|LUCA1|MPS9|NAT6	protein-coding	hyaluronidase 1	This gene encodes a lysosomal hyaluronidase. Hyaluronidases intracellularly degrade hyaluronan, one of the major glycosaminoglycans of the extracellular matrix. Hyaluronan is thought to be involved in cell proliferation, migration and differentiation. This enzyme is active at an acidic pH and is the major hyaluronidase in plasma. Mutations in this gene are associated with mucopolysaccharidosis ty…	chr3:50299893-50303574;chr3:50299889-50312381
m	M3	8768	3553	H. sapiens	3553	H. sapiens	IL1B	IL-1|IL1-BETA|IL1F2|IL1beta	protein-coding	interleukin 1 beta	The protein encoded by this gene is a member of the interleukin 1 cytokine family. This cytokine is produced by activated macrophages as a proprotein, which is proteolytically processed to its active form by caspase 1 (CASP1/ICE). This cytokine is an important mediator of the inflammatory response, and is involved in a variety of cellular activities, including cell proliferation, differentiation,…	chr2:112829756-112836779
g	G4	5280378	3558	H. sapiens	3558	H. sapiens	IL2	IL-2|TCGF|lymphokine	protein-coding	interleukin 2	The protein encoded by this gene is a secreted cytokine that is important for the proliferation of T and B lymphocytes. The receptor of this cytokine is a heterotrimeric protein complex whose gamma chain is also shared by interleukin 4 (IL4) and interleukin 7 (IL7). The expression of this gene in mature thymocytes is monoallelic, which represents an unusual regulatory mode for controlling the pre…	chr4:122451471-122456725
g	G2	442813	3558	H. sapiens	3558	H. sapiens	IL2	IL-2|TCGF|lymphokine	protein-coding	interleukin 2	The protein encoded by this gene is a secreted cytokine that is important for the proliferation of T and B lymphocytes. The receptor of this cytokine is a heterotrimeric protein complex whose gamma chain is also shared by interleukin 4 (IL4) and interleukin 7 (IL7). The expression of this gene in mature thymocytes is monoallelic, which represents an unusual regulatory mode for controlling the pre…	chr4:122451471-122456725
g	G1	14982	3577	H. sapiens	3577	H. sapiens	CXCR1	C-C|C-C-CKR-1|CD128|CD181|CDw128a|CKR-1|CMKAR1|IL8R1|IL8RA|IL8RBA	protein-coding	C-X-C motif chemokine receptor 1	The protein encoded by this gene is a member of the G-protein-coupled receptor family. This protein is a receptor for interleukin 8 (IL8). It binds to IL8 with high affinity, and transduces the signal through a G-protein activated second messenger system. Knockout studies in mice suggested that this protein inhibits embryonic oligodendrocyte precursor migration in developing spinal cord. This gen…	chr2:218162841-218166962
g	G1	14982	3579	H. sapiens	3579	H. sapiens	CXCR2	CD182|CDw128b|CMKAR2|IL8R2|IL8RA|IL8RB	protein-coding	C-X-C motif chemokine receptor 2	The protein encoded by this gene is a member of the G-protein-coupled receptor family. This protein is a receptor for interleukin 8 (IL8). It binds to IL8 with high affinity, and transduces the signal through a G-protein activated second messenger system. This receptor also binds to chemokine (C-X-C motif) ligand 1 (CXCL1/MGSA), a protein with melanoma growth stimulating activity, and has been sh…	chr2:218125294-218137251;chr2:218126028-218137251
m	M2	5281792	3725	H. sapiens	3725	H. sapiens	JUN	AP-1|AP1|c-Jun|cJUN|p39	protein-coding	Jun proto-oncogene, AP-1 transcription factor subunit	This gene is the putative transforming gene of avian sarcoma virus 17. It encodes a protein which is highly similar to the viral protein, and which interacts directly with specific target DNA sequences to regulate gene expression. This gene is intronless and is mapped to 1p32-p31, a chromosomal region involved in both translocations and deletions in human malignancies. [provided by RefSeq, Jul 20…	chr1:58780791-58784047
g	G1	14982	3757	H. sapiens	3757	H. sapiens	KCNH2	ERG-1|ERG1|H-ERG|HERG|HERG1|Kv11.1|LQT2|SQT1	protein-coding	potassium voltage-gated channel subfamily H member 2	This gene encodes a voltage-activated potassium channel belonging to the eag family. It shares sequence similarity with the Drosophila ether-a-go-go (eag) gene. Mutations in this gene can cause long QT syndrome type 2 (LQT2). Transcript variants encoding distinct isoforms have been identified. [provided by RefSeq, Jul 2008]	chr7:150949431-150978314;chr7:150949431-150955804;chr7:150944956-150955829;chr7:150944961-150978321
g	G2	442813	3757	H. sapiens	3757	H. sapiens	KCNH2	ERG-1|ERG1|H-ERG|HERG|HERG1|Kv11.1|LQT2|SQT1	protein-coding	potassium voltage-gated channel subfamily H member 2	This gene encodes a voltage-activated potassium channel belonging to the eag family. It shares sequence similarity with the Drosophila ether-a-go-go (eag) gene. Mutations in this gene can cause long QT syndrome type 2 (LQT2). Transcript variants encoding distinct isoforms have been identified. [provided by RefSeq, Jul 2008]	chr7:150949431-150978314;chr7:150949431-150955804;chr7:150944956-150955829;chr7:150944961-150978321
am	AM1	5281426	3837	H. sapiens	3837	H. sapiens	KPNB1	IMB1|IPO1|IPOB|Impnb|NTF97	protein-coding	karyopherin subunit beta 1	Nucleocytoplasmic transport, a signal- and energy-dependent process, takes place through nuclear pore complexes embedded in the nuclear envelope. The import of proteins containing a nuclear localization signal (NLS) requires the NLS import receptor, a heterodimer of importin alpha and beta subunits also known as karyopherins. Importin alpha binds the NLS-containing cargo in the cytoplasm and impo…	chr17:47649919-47685505;chr17:47651065-47685505
g	G4	5280378	3837	H. sapiens	3837	H. sapiens	KPNB1	IMB1|IPO1|IPOB|Impnb|NTF97	protein-coding	karyopherin subunit beta 1	Nucleocytoplasmic transport, a signal- and energy-dependent process, takes place through nuclear pore complexes embedded in the nuclear envelope. The import of proteins containing a nuclear localization signal (NLS) requires the NLS import receptor, a heterodimer of importin alpha and beta subunits also known as karyopherins. Importin alpha binds the NLS-containing cargo in the cytoplasm and impo…	chr17:47649919-47685505;chr17:47651065-47685505
m	M2	5315615	3837	H. sapiens	3837	H. sapiens	KPNB1	IMB1|IPO1|IPOB|Impnb|NTF97	protein-coding	karyopherin subunit beta 1	Nucleocytoplasmic transport, a signal- and energy-dependent process, takes place through nuclear pore complexes embedded in the nuclear envelope. The import of proteins containing a nuclear localization signal (NLS) requires the NLS import receptor, a heterodimer of importin alpha and beta subunits also known as karyopherins. Importin alpha binds the NLS-containing cargo in the cytoplasm and impo…	chr17:47649919-47685505;chr17:47651065-47685505
g	G1	14982	3932	H. sapiens	3932	H. sapiens	LCK	IMD22|LSK|YT16|p56lck|pp58lck	protein-coding	LCK proto-oncogene, Src family tyrosine kinase	This gene is a member of the Src family of protein tyrosine kinases (PTKs). The encoded protein is a key signaling molecule in the selection and maturation of developing T-cells. It contains N-terminal sites for myristylation and palmitylation, a PTK domain, and SH2 and SH3 domains which are involved in mediating protein-protein interactions with phosphotyrosine-containing and proline-rich motifs…	chr1:32251265-32286165;chr1:32274111-32286167
m	M2	5281792	3932	H. sapiens	3932	H. sapiens	LCK	IMD22|LSK|YT16|p56lck|pp58lck	protein-coding	LCK proto-oncogene, Src family tyrosine kinase	This gene is a member of the Src family of protein tyrosine kinases (PTKs). The encoded protein is a key signaling molecule in the selection and maturation of developing T-cells. It contains N-terminal sites for myristylation and palmitylation, a PTK domain, and SH2 and SH3 domains which are involved in mediating protein-protein interactions with phosphotyrosine-containing and proline-rich motifs…	chr1:32251265-32286165;chr1:32274111-32286167
g	G3	5282073	3932	H. sapiens	3932	H. sapiens	LCK	IMD22|LSK|YT16|p56lck|pp58lck	protein-coding	LCK proto-oncogene, Src family tyrosine kinase	This gene is a member of the Src family of protein tyrosine kinases (PTKs). The encoded protein is a key signaling molecule in the selection and maturation of developing T-cells. It contains N-terminal sites for myristylation and palmitylation, a PTK domain, and SH2 and SH3 domains which are involved in mediating protein-protein interactions with phosphotyrosine-containing and proline-rich motifs…	chr1:32251265-32286165;chr1:32274111-32286167
m	M3	8768	4000	H. sapiens	4000	H. sapiens	LMNA	CDCD1|CDDC|CMD1A|CMT2B1|EMD2|FPL|FPLD|FPLD2|HGPS|IDC|LDP1|LFP|LGMD1B|LMN1|LMNC|LMNL1|MADA|PRO1	protein-coding	lamin A/C	The nuclear lamina consists of a two-dimensional matrix of proteins located next to the inner nuclear membrane. The lamin family of proteins make up the matrix and are highly conserved in evolution. During mitosis, the lamina matrix is reversibly disassembled as the lamin proteins are phosphorylated. Lamin proteins are thought to be involved in nuclear stability, chromatin structure and gene expr…	chr1:156126117-156137866;chr1:156082546-156137866;chr1:156114670-156137866;chr1:156114711-156140081;chr1:156126170-156140081;chr1:156114670-156140089
z	Z1	3473	4048	H. sapiens	4048	H. sapiens	LTA4H		protein-coding	leukotriene A4 hydrolase	The protein encoded by this gene is an enzyme that contains both hydrolase and aminopeptidase activities. The hydrolase activity is used in the final step of the biosynthesis of leukotriene B4, a proinflammatory mediator. The aminopeptidase activity has been shown to degrade proline-glycine-proline (PGP), a neutrophil chemoattractant and biomarker for chronic obstructive pulmonary disease (COPD).…	chr12:96000753-96043520;chr12:96000753-96035661;chr12:96000753-96035587
g	G4	5280378	4087	H. sapiens	4087	H. sapiens	SMAD2	JV18|JV18-1|MADH2|MADR2|hMAD-2|hSMAD2	protein-coding	SMAD family member 2	The protein encoded by this gene belongs to the SMAD, a family of proteins similar to the gene products of the Drosophila gene 'mothers against decapentaplegic' (Mad) and the C. elegans gene Sma. SMAD proteins are signal transducers and transcriptional modulators that mediate multiple signaling pathways. This protein mediates the signal of the transforming growth factor (TGF)-beta, and thus regul…	chr18:47833095-47931146;chr18:47808957-47930659;chr18:47808957-47930872
b	B3	44202892	4088	H. sapiens	4088	H. sapiens	SMAD3	HSPC193|HsT17436|JV15-2|LDS1C|LDS3|MADH3	protein-coding	SMAD family member 3	The SMAD family of proteins are a group of intracellular signal transducer proteins similar to the gene products of the Drosophila gene 'mothers against decapentaplegic' (Mad) and the C. elegans gene Sma. The SMAD3 protein functions in the transforming growth factor-beta signaling pathway, and transmits signals from the cell surface to the nucleus, regulating gene activity and cell proliferation.…	chr15:67065602-67195167;chr15:67166155-67195195;chr15:67138021-67195195;chr15:67125716-67195195
g	G4	5280378	4088	H. sapiens	4088	H. sapiens	SMAD3	HSPC193|HsT17436|JV15-2|LDS1C|LDS3|MADH3	protein-coding	SMAD family member 3	The SMAD family of proteins are a group of intracellular signal transducer proteins similar to the gene products of the Drosophila gene 'mothers against decapentaplegic' (Mad) and the C. elegans gene Sma. The SMAD3 protein functions in the transforming growth factor-beta signaling pathway, and transmits signals from the cell surface to the nucleus, regulating gene activity and cell proliferation.…	chr15:67065602-67195167;chr15:67166155-67195195;chr15:67138021-67195195;chr15:67125716-67195195
g	G1	14982	4128	H. sapiens	4128	H. sapiens	MAOA	BRNRS|MAO-A	protein-coding	monoamine oxidase A	This gene is one of two neighboring gene family members that encode mitochondrial enzymes which catalyze the oxidative deamination of amines, such as dopamine, norepinephrine, and serotonin. Mutation of this gene results in Brunner syndrome. This gene has also been associated with a variety of other psychiatric disorders, including antisocial behavior. Alternatively spliced transcript variants en…	chrX:43654907-43746824;chrX:43656299-43746817
g	G2	442813	4128	H. sapiens	4128	H. sapiens	MAOA	BRNRS|MAO-A	protein-coding	monoamine oxidase A	This gene is one of two neighboring gene family members that encode mitochondrial enzymes which catalyze the oxidative deamination of amines, such as dopamine, norepinephrine, and serotonin. Mutation of this gene results in Brunner syndrome. This gene has also been associated with a variety of other psychiatric disorders, including antisocial behavior. Alternatively spliced transcript variants en…	chrX:43654907-43746824;chrX:43656299-43746817
g	G3	5282073	4128	H. sapiens	4128	H. sapiens	MAOA	BRNRS|MAO-A	protein-coding	monoamine oxidase A	This gene is one of two neighboring gene family members that encode mitochondrial enzymes which catalyze the oxidative deamination of amines, such as dopamine, norepinephrine, and serotonin. Mutation of this gene results in Brunner syndrome. This gene has also been associated with a variety of other psychiatric disorders, including antisocial behavior. Alternatively spliced transcript variants en…	chrX:43654907-43746824;chrX:43656299-43746817
g	G2	442813	4129	H. sapiens	4129	H. sapiens	MAOB		protein-coding	monoamine oxidase B	The protein encoded by this gene belongs to the flavin monoamine oxidase family. It is a enzyme located in the mitochondrial outer membrane. It catalyzes the oxidative deamination of biogenic and xenobiotic amines and plays an important role in the metabolism of neuroactive and vasoactive amines in the central nervous sysytem and peripheral tissues. This protein preferentially degrades benzylamin…	chrX:43766610-43882450
g	G3	5282073	4129	H. sapiens	4129	H. sapiens	MAOB		protein-coding	monoamine oxidase B	The protein encoded by this gene belongs to the flavin monoamine oxidase family. It is a enzyme located in the mitochondrial outer membrane. It catalyzes the oxidative deamination of biogenic and xenobiotic amines and plays an important role in the metabolism of neuroactive and vasoactive amines in the central nervous sysytem and peripheral tissues. This protein preferentially degrades benzylamin…	chrX:43766610-43882450
m	M2	5281792	4137	H. sapiens	4137	H. sapiens	MAPT	DDPAC|FTDP-17|MAPTL|MSTD|MTBT1|MTBT2|PPND|PPP1R103|TAU	protein-coding	microtubule associated protein tau	This gene encodes the microtubule-associated protein tau (MAPT) whose transcript undergoes complex, regulated alternative splicing, giving rise to several mRNA species. MAPT transcripts are differentially expressed in the nervous system, depending on stage of neuronal maturation and neuron type. MAPT gene mutations have been associated with several neurodegenerative disorders such as Alzheimer's …	chr17_KI270908v1_alt:596685-730445;chr17_GL000258v2_alt:760288-893837;chr17:45894382-46028333;chr17_KI270908v1_alt:596513-730445;chr17:45894554-46028333;chr17_GL000258v2_alt:760288-893665
g	G4	5280378	4137	H. sapiens	4137	H. sapiens	MAPT	DDPAC|FTDP-17|MAPTL|MSTD|MTBT1|MTBT2|PPND|PPP1R103|TAU	protein-coding	microtubule associated protein tau	This gene encodes the microtubule-associated protein tau (MAPT) whose transcript undergoes complex, regulated alternative splicing, giving rise to several mRNA species. MAPT transcripts are differentially expressed in the nervous system, depending on stage of neuronal maturation and neuron type. MAPT gene mutations have been associated with several neurodegenerative disorders such as Alzheimer's …	chr17_KI270908v1_alt:596685-730445;chr17_GL000258v2_alt:760288-893837;chr17:45894382-46028333;chr17_KI270908v1_alt:596513-730445;chr17:45894554-46028333;chr17_GL000258v2_alt:760288-893665
m	M2	5315615	4137	H. sapiens	4137	H. sapiens	MAPT	DDPAC|FTDP-17|MAPTL|MSTD|MTBT1|MTBT2|PPND|PPP1R103|TAU	protein-coding	microtubule associated protein tau	This gene encodes the microtubule-associated protein tau (MAPT) whose transcript undergoes complex, regulated alternative splicing, giving rise to several mRNA species. MAPT transcripts are differentially expressed in the nervous system, depending on stage of neuronal maturation and neuron type. MAPT gene mutations have been associated with several neurodegenerative disorders such as Alzheimer's …	chr17_KI270908v1_alt:596685-730445;chr17_GL000258v2_alt:760288-893837;chr17:45894382-46028333;chr17_KI270908v1_alt:596513-730445;chr17:45894554-46028333;chr17_GL000258v2_alt:760288-893665
m	M2	5315615	4154	H. sapiens	4154	H. sapiens	MBNL1	EXP|MBNL	protein-coding	muscleblind like splicing regulator 1	This gene encodes a member of the muscleblind protein family which was initially described in Drosophila melanogaster. The encoded protein is a C3H-type zinc finger protein that modulates alternative splicing of pre-mRNAs. Muscleblind proteins bind specifically to expanded dsCUG RNA but not to normal size CUG repeats and may thereby play a role in the pathophysiology of myotonic dystrophy. Mice l…	chr3:152268929-152465780;chr3:152299014-152465780;chr3:152243632-152465780
g	G1	14982	4159	H. sapiens	4159	H. sapiens	MC3R	BMIQ9|MC3|MC3-R|OB20|OQTL	protein-coding	melanocortin 3 receptor	This gene encodes a G-protein-coupled receptor for melanocyte-stimulating hormone and adrenocorticotropic hormone that is expressed in tissues other than the adrenal cortex and melanocytes. This gene maps to the same region as the locus for benign neonatal epilepsy. Mice deficient for this gene have increased fat mass despite decreased food intake, suggesting a role for this gene product in the r…	chr20:56248732-56249815
g	G1	14982	4160	H. sapiens	4160	H. sapiens	MC4R	BMIQ20	protein-coding	melanocortin 4 receptor	The protein encoded by this gene is a membrane-bound receptor and member of the melanocortin receptor family. The encoded protein interacts with adrenocorticotropic and MSH hormones and is mediated by G proteins. This is an intronless gene. Defects in this gene are a cause of autosomal dominant obesity. [provided by RefSeq, Jan 2010]	chr18:60371062-60372775
g	G1	14982	4161	H. sapiens	4161	H. sapiens	MC5R	MC2	protein-coding	melanocortin 5 receptor	This gene encodes a member of the seven-pass transmembrane G protein-coupled melanocortin receptor protein family that stimulate cAMP signal transduction. The encoded protein is a receptor for melanocyte-stimulating hormone and adrenocorticotropic hormone and is suggested to play a role in sebum generation. [provided by RefSeq, Jun 2010]	chr18:13824149-13827323
m	M2	5281792	4170	H. sapiens	4170	H. sapiens	MCL1	BCL2L3|EAT|MCL1-ES|MCL1L|MCL1S|Mcl-1|TM|bcl2-L-3|mcl1/EAT	protein-coding	MCL1 apoptosis regulator, BCL2 family member	This gene encodes an anti-apoptotic protein, which is a member of the Bcl-2 family. Alternative splicing results in multiple transcript variants. The longest gene product (isoform 1) enhances cell survival by inhibiting apoptosis while the alternatively spliced shorter gene products (isoform 2 and isoform 3) promote apoptosis and are death-inducing. [provided by RefSeq, Oct 2010]	chr1:150574551-150579738;chr1:150574558-150579610
am	AM1	5281426	4221	H. sapiens	4221	H. sapiens	MEN1	MEAI|SCG2	protein-coding	menin 1	This gene encodes menin, a tumor suppressor associated with a syndrome known as multiple endocrine neoplasia type 1. Menin is a scaffold protein that functions in histone modification and epigenetic gene regulation. It is thought to regulate several pathways and processes by altering chromatin structure through the modification of histones. [provided by RefSeq, May 2019]	chr11:64803522-64810551;chr11:64803514-64810741;chr11:64803514-64810563;chr11:64803514-64810716;chr11:64803514-64811294;chr11:64803514-64810551
g	G4	5280378	4221	H. sapiens	4221	H. sapiens	MEN1	MEAI|SCG2	protein-coding	menin 1	This gene encodes menin, a tumor suppressor associated with a syndrome known as multiple endocrine neoplasia type 1. Menin is a scaffold protein that functions in histone modification and epigenetic gene regulation. It is thought to regulate several pathways and processes by altering chromatin structure through the modification of histones. [provided by RefSeq, May 2019]	chr11:64803522-64810551;chr11:64803514-64810741;chr11:64803514-64810563;chr11:64803514-64810716;chr11:64803514-64811294;chr11:64803514-64810551
m	M2	5281792	4286	H. sapiens	4286	H. sapiens	MITF	CMM8|COMMAD|MI|WS2|WS2A|bHLHe32	protein-coding	melanocyte inducing transcription factor	The protein encoded by this gene is a transcription factor that contains both basic helix-loop-helix and leucine zipper structural features. The encoded protein regulates melanocyte development and is responsible for pigment cell-specific transcription of the melanogenesis enzyme genes. Heterozygous mutations in the this gene cause auditory-pigmentary syndromes, such as Waardenburg syndrome type …	chr3:69763811-69968337;chr3:69763504-69968332;chr3:69936592-69968332;chr3:69739464-69968332;chr3:69936600-69968337;chr3:69866224-69968332;chr3:69936592-69939065
m	M2	5315615	4286	H. sapiens	4286	H. sapiens	MITF	CMM8|COMMAD|MI|WS2|WS2A|bHLHe32	protein-coding	melanocyte inducing transcription factor	The protein encoded by this gene is a transcription factor that contains both basic helix-loop-helix and leucine zipper structural features. The encoded protein regulates melanocyte development and is responsible for pigment cell-specific transcription of the melanogenesis enzyme genes. Heterozygous mutations in the this gene cause auditory-pigmentary syndromes, such as Waardenburg syndrome type …	chr3:69763811-69968337;chr3:69763504-69968332;chr3:69936592-69968332;chr3:69739464-69968332;chr3:69936600-69968337;chr3:69866224-69968332;chr3:69936592-69939065
am	AM1	5281426	4297	H. sapiens	4297	H. sapiens	KMT2A	ALL-1|CXXC7|HRX|HTRX1|MLL|MLL1|MLL1A|TRX1|WDSTS	protein-coding	lysine methyltransferase 2A	This gene encodes a transcriptional coactivator that plays an essential role in regulating gene expression during early development and hematopoiesis. The encoded protein contains multiple conserved functional domains. One of these domains, the SET domain, is responsible for its histone H3 lysine 4 (H3K4) methyltransferase activity which mediates chromatin modifications associated with epigenetic…	chr11:118436492-118526832
g	G4	5280378	4297	H. sapiens	4297	H. sapiens	KMT2A	ALL-1|CXXC7|HRX|HTRX1|MLL|MLL1|MLL1A|TRX1|WDSTS	protein-coding	lysine methyltransferase 2A	This gene encodes a transcriptional coactivator that plays an essential role in regulating gene expression during early development and hematopoiesis. The encoded protein contains multiple conserved functional domains. One of these domains, the SET domain, is responsible for its histone H3 lysine 4 (H3K4) methyltransferase activity which mediates chromatin modifications associated with epigenetic…	chr11:118436492-118526832
g	G1	14982	4312	H. sapiens	4312	H. sapiens	MMP1	CLG|CLGN	protein-coding	matrix metallopeptidase 1	This gene encodes a member of the peptidase M10 family of matrix metalloproteinases (MMPs). Proteins in this family are involved in the breakdown of extracellular matrix in normal physiological processes, such as embryonic development, reproduction, and tissue remodeling, as well as in disease processes, such as arthritis and metastasis. The encoded preproprotein is proteolytically processed to g…	chr11:102789919-102798160
m	M2	5281792	4312	H. sapiens	4312	H. sapiens	MMP1	CLG|CLGN	protein-coding	matrix metallopeptidase 1	This gene encodes a member of the peptidase M10 family of matrix metalloproteinases (MMPs). Proteins in this family are involved in the breakdown of extracellular matrix in normal physiological processes, such as embryonic development, reproduction, and tissue remodeling, as well as in disease processes, such as arthritis and metastasis. The encoded preproprotein is proteolytically processed to g…	chr11:102789919-102798160
g	G1	14982	4318	H. sapiens	4318	H. sapiens	MMP9	CLG4B|GELB|MANDP2|MMP-9	protein-coding	matrix metallopeptidase 9	Proteins of the matrix metalloproteinase (MMP) family are involved in the breakdown of extracellular matrix in normal physiological processes, such as embryonic development, reproduction, and tissue remodeling, as well as in disease processes, such as arthritis and metastasis. Most MMP's are secreted as inactive proproteins which are activated when cleaved by extracellular proteinases. The enzyme…	chr20:46008908-46016561
m	M3	8768	4353	H. sapiens	4353	H. sapiens	MPO		protein-coding	myeloperoxidase	Myeloperoxidase (MPO) is a heme protein synthesized during myeloid differentiation that constitutes the major component of neutrophil azurophilic granules. Produced as a single chain precursor, myeloperoxidase is subsequently cleaved into a light and heavy chain. The mature myeloperoxidase is a tetramer composed of 2 light chains and 2 heavy chains. This enzyme produces hypohalous acids central t…	chr17:58269855-58280935
am	AM1	5281426	4363	H. sapiens	4363	H. sapiens	ABCC1	ABC29|ABCC|GS-X|MRP|MRP1	protein-coding	ATP binding cassette subfamily C member 1	The protein encoded by this gene is a member of the superfamily of ATP-binding cassette (ABC) transporters. ABC proteins transport various molecules across extra-and intra-cellular membranes. ABC genes are divided into seven distinct subfamilies (ABC1, MDR/TAP, MRP, ALD, OABP, GCN20, White). This full transporter is a member of the MRP subfamily which is involved in multi-drug resistance. This pr…	chr16:15949616-16143053;chr16_KI270853v1_alt:1607598-1800945
g	G4	5280378	4363	H. sapiens	4363	H. sapiens	ABCC1	ABC29|ABCC|GS-X|MRP|MRP1	protein-coding	ATP binding cassette subfamily C member 1	The protein encoded by this gene is a member of the superfamily of ATP-binding cassette (ABC) transporters. ABC proteins transport various molecules across extra-and intra-cellular membranes. ABC genes are divided into seven distinct subfamilies (ABC1, MDR/TAP, MRP, ALD, OABP, GCN20, White). This full transporter is a member of the MRP subfamily which is involved in multi-drug resistance. This pr…	chr16:15949616-16143053;chr16_KI270853v1_alt:1607598-1800945
g	G3	5282073	4759	H. sapiens	4759	H. sapiens	NEU2	SIAL2	protein-coding	neuraminidase 2	This gene belongs to a family of glycohydrolytic enzymes which remove sialic acid residues from glycoproteins and glycolipids. Expression studies in COS7 cells confirmed that this gene encodes a functional sialidase. Its cytosolic localization was demonstrated by cell fractionation experiments. [provided by RefSeq, Jul 2008]	chr2:233032672-233035057
am	AM1	5281426	4780	H. sapiens	4780	H. sapiens	NFE2L2	HEBP1|IMDDHH|NRF2|Nrf-2	protein-coding	nuclear factor, erythroid 2 like 2	This gene encodes a transcription factor which is a member of a small family of basic leucine zipper (bZIP) proteins. The encoded transcription factor regulates genes which contain antioxidant response elements (ARE) in their promoters; many of these genes encode proteins involved in response to injury and inflammation which includes the production of free radicals. Multiple transcript variants e…	chr2:177230303-177264131;chr2:177230303-177265131;chr2:177230309-177264727
g	G4	5280378	4780	H. sapiens	4780	H. sapiens	NFE2L2	HEBP1|IMDDHH|NRF2|Nrf-2	protein-coding	nuclear factor, erythroid 2 like 2	This gene encodes a transcription factor which is a member of a small family of basic leucine zipper (bZIP) proteins. The encoded transcription factor regulates genes which contain antioxidant response elements (ARE) in their promoters; many of these genes encode proteins involved in response to injury and inflammation which includes the production of free radicals. Multiple transcript variants e…	chr2:177230303-177264131;chr2:177230303-177265131;chr2:177230309-177264727
g	G2	442813	4780	H. sapiens	4780	H. sapiens	NFE2L2	HEBP1|IMDDHH|NRF2|Nrf-2	protein-coding	nuclear factor, erythroid 2 like 2	This gene encodes a transcription factor which is a member of a small family of basic leucine zipper (bZIP) proteins. The encoded transcription factor regulates genes which contain antioxidant response elements (ARE) in their promoters; many of these genes encode proteins involved in response to injury and inflammation which includes the production of free radicals. Multiple transcript variants e…	chr2:177230303-177264131;chr2:177230303-177265131;chr2:177230309-177264727
g	G2	3733033	4780	H. sapiens	4780	H. sapiens	NFE2L2	HEBP1|IMDDHH|NRF2|Nrf-2	protein-coding	nuclear factor, erythroid 2 like 2	This gene encodes a transcription factor which is a member of a small family of basic leucine zipper (bZIP) proteins. The encoded transcription factor regulates genes which contain antioxidant response elements (ARE) in their promoters; many of these genes encode proteins involved in response to injury and inflammation which includes the production of free radicals. Multiple transcript variants e…	chr2:177230303-177264131;chr2:177230303-177265131;chr2:177230309-177264727
g	G4	5280378	4790	H. sapiens	4790	H. sapiens	NFKB1	CVID12|EBP-1|KBF1|NF-kB|NF-kB1|NF-kappa-B1|NF-kappaB|NFKB-p105|NFKB-p50|NFkappaB|p105|p50	protein-coding	nuclear factor kappa B subunit 1	This gene encodes a 105 kD protein which can undergo cotranslational processing by the 26S proteasome to produce a 50 kD protein. The 105 kD protein is a Rel protein-specific transcription inhibitor and the 50 kD protein is a DNA binding subunit of the NF-kappa-B (NFKB) protein complex. NFKB is a transcription regulator that is activated by various intra- and extra-cellular stimuli such as cytoki…	chr4:102501934-102617302;chr4:102501359-102617302
g	G4	5280378	4791	H. sapiens	4791	H. sapiens	NFKB2	CVID10|H2TF1|LYT-10|LYT10|NF-kB2|p100|p49/p100|p52	protein-coding	nuclear factor kappa B subunit 2	This gene encodes a subunit of the transcription factor complex nuclear factor-kappa-B (NFkB). The NFkB complex is expressed in numerous cell types and functions as a central activator of genes involved in inflammation and immune function. The protein encoded by this gene can function as both a transcriptional activator or repressor depending on its dimerization partner. The p100 full-length prot…	chr10:102394578-102402529;chr10:102395705-102402524;chr10:102394110-102402529
g	G2	3733033	4864	H. sapiens	4864	H. sapiens	NPC1	NPC|POGZ|SLC65A1	protein-coding	NPC intracellular cholesterol transporter 1	This gene encodes a large protein that resides in the limiting membrane of endosomes and lysosomes and mediates intracellular cholesterol trafficking via binding of cholesterol to its N-terminal domain. It is predicted to have a cytoplasmic C-terminus, 13 transmembrane domains, and 3 large loops in the lumen of the endosome - the last loop being at the N-terminus. This protein transports low-dens…	chr18:23531442-23586506
g	G1	14982	4886	H. sapiens	4886	H. sapiens	NPY1R	NPY1-R|NPYR	protein-coding	neuropeptide Y receptor Y1	This gene belongs to the G-protein-coupled receptor superfamily. The encoded transmembrane protein mediates the function of neuropeptide Y (NPY), a neurotransmitter, and peptide YY (PYY), a gastrointestinal hormone. The encoded receptor undergoes fast agonist-induced internalization through clathrin-coated pits and is subsequently recycled back to the cell membrane. Activation of Y1 receptors may…	chr4:163323962-163332596
g	G1	14982	4887	H. sapiens	4887	H. sapiens	NPY2R	NPY2-R	protein-coding	neuropeptide Y receptor Y2		chr4:155208636-155217076;chr4:155173723-155217076
g	G1	14982	4985	H. sapiens	4985	H. sapiens	OPRD1	DOP|DOR|DOR1|OPRD	protein-coding	opioid receptor delta 1		chr1:28812170-28871267
g	G3	5282073	4985	H. sapiens	4985	H. sapiens	OPRD1	DOP|DOR|DOR1|OPRD	protein-coding	opioid receptor delta 1		chr1:28812170-28871267
g	G1	14982	4986	H. sapiens	4986	H. sapiens	OPRK1	K-OR-1|KOR|KOR-1|OPRK	protein-coding	opioid receptor kappa 1	This gene encodes an opioid receptor, which is a member of the 7 transmembrane-spanning G protein-coupled receptor family. It functions as a receptor for endogenous ligands, as well as a receptor for various synthetic opioids. Ligand binding results in inhibition of adenylate cyclase activity and neurotransmitter release. This opioid receptor plays a role in the perception of pain and mediating t…	chr8:53225716-53251697;chr8:53225724-53251637
g	G3	5282073	4986	H. sapiens	4986	H. sapiens	OPRK1	K-OR-1|KOR|KOR-1|OPRK	protein-coding	opioid receptor kappa 1	This gene encodes an opioid receptor, which is a member of the 7 transmembrane-spanning G protein-coupled receptor family. It functions as a receptor for endogenous ligands, as well as a receptor for various synthetic opioids. Ligand binding results in inhibition of adenylate cyclase activity and neurotransmitter release. This opioid receptor plays a role in the perception of pain and mediating t…	chr8:53225716-53251697;chr8:53225724-53251637
g	G1	14982	4988	H. sapiens	4988	H. sapiens	OPRM1	LMOR|M-OR-1|MOP|MOR|MOR1|OPRM	protein-coding	opioid receptor mu 1	This gene encodes one of at least three opioid receptors in humans; the mu opioid receptor (MOR). The MOR is the principal target of endogenous opioid peptides and opioid analgesic agents such as beta-endorphin and enkephalins. The MOR also has an important role in dependence to other drugs of abuse, such as nicotine, cocaine, and alcohol via its modulation of the dopamine system. The NM_00100850…	chr6:154039102-154132354;chr6:154039411-154109018;chr6:154039411-154093520;chr6:154010496-154132354;chr6:154086507-154132354;chr6:154039411-154107652;chr6:154039102-154091938;chr6:154039411-154246867;chr6:154039102-154091957;chr6:154089762-154091957;chr6:154039411-154110453;chr6:154089762-154091938;chr6:154039411-154132354
g	G3	5282073	4988	H. sapiens	4988	H. sapiens	OPRM1	LMOR|M-OR-1|MOP|MOR|MOR1|OPRM	protein-coding	opioid receptor mu 1	This gene encodes one of at least three opioid receptors in humans; the mu opioid receptor (MOR). The MOR is the principal target of endogenous opioid peptides and opioid analgesic agents such as beta-endorphin and enkephalins. The MOR also has an important role in dependence to other drugs of abuse, such as nicotine, cocaine, and alcohol via its modulation of the dopamine system. The NM_00100850…	chr6:154039102-154132354;chr6:154039411-154109018;chr6:154039411-154093520;chr6:154010496-154132354;chr6:154086507-154132354;chr6:154039411-154107652;chr6:154039102-154091938;chr6:154039411-154246867;chr6:154039102-154091957;chr6:154089762-154091957;chr6:154039411-154110453;chr6:154089762-154091938;chr6:154039411-154132354
g	G4	5280378	5142	H. sapiens	5142	H. sapiens	PDE4B	DPDE4|PDEIVB	protein-coding	phosphodiesterase 4B	This gene is a member of the type IV, cyclic AMP (cAMP)-specific, cyclic nucleotide phosphodiesterase (PDE) family. The encoded protein regulates the cellular concentrations of cyclic nucleotides and thereby play a role in signal transduction. Altered activity of this protein has been associated with schizophrenia and bipolar affective disorder. Alternative splicing and the use of alternative pro…	chr1:65992616-66374579;chr1:66354535-66374574;chr1:65792510-66374579;chr1:66332108-66374579;chr1:65913245-66374579;chr1:65792895-66374574
g	G4	5280378	5241	H. sapiens	5241	H. sapiens	PGR	NR3C3|PR	protein-coding	progesterone receptor	This gene encodes a member of the steroid receptor superfamily. The encoded protein mediates the physiological effects of progesterone, which plays a central role in reproductive events associated with the establishment and maintenance of pregnancy. This gene uses two distinct promotors and translation start sites in the first exon to produce several transcript variants, both protein coding and n…	chr11:101029624-101129063;chr11:101029624-101129813
am	AM2	155948	5241	H. sapiens	5241	H. sapiens	PGR	NR3C3|PR	protein-coding	progesterone receptor	This gene encodes a member of the steroid receptor superfamily. The encoded protein mediates the physiological effects of progesterone, which plays a central role in reproductive events associated with the establishment and maintenance of pregnancy. This gene uses two distinct promotors and translation start sites in the first exon to produce several transcript variants, both protein coding and n…	chr11:101029624-101129063;chr11:101029624-101129813
m	M2	5281792	5315	H. sapiens	5315	H. sapiens	PKM	CTHBP|HEL-S-30|OIP3|PK3|PKM2|TCB|THBP1|p58	protein-coding	pyruvate kinase M1/2	This gene encodes a protein involved in glycolysis. The encoded protein is a pyruvate kinase that catalyzes the transfer of a phosphoryl group from phosphoenolpyruvate to ADP, generating ATP and pyruvate. This protein has been shown to interact with thyroid hormone and may mediate cellular metabolic effects induced by thyroid hormones. This protein has been found to bind Opa protein, a bacterial …	chr15:72199029-72231190;chr15:72199029-72231624;chr15:72199029-72229911
m	M2	5281792	5423	H. sapiens	5423	H. sapiens	POLB		protein-coding	DNA polymerase beta	The protein encoded by this gene is a DNA polymerase involved in base excision and repair, also called gap-filling DNA synthesis. The encoded protein, acting as a monomer, is normally found in the cytoplasm, but it translocates to the nucleus upon DNA damage. Several transcript variants of this gene exist, but the full-length nature of only one has been described to date. [provided by RefSeq, Sep…	chr8:42338494-42371808
m	M2	5315615	5423	H. sapiens	5423	H. sapiens	POLB		protein-coding	DNA polymerase beta	The protein encoded by this gene is a DNA polymerase involved in base excision and repair, also called gap-filling DNA synthesis. The encoded protein, acting as a monomer, is normally found in the cytoplasm, but it translocates to the nucleus upon DNA damage. Several transcript variants of this gene exist, but the full-length nature of only one has been described to date. [provided by RefSeq, Sep…	chr8:42338494-42371808
m	M2	5315615	5429	H. sapiens	5429	H. sapiens	POLH	RAD30|RAD30A|XP-V|XPV	protein-coding	DNA polymerase eta	This gene encodes a member of the Y family of specialized DNA polymerases. It copies undamaged DNA with a lower fidelity than other DNA-directed polymerases. However, it accurately replicates UV-damaged DNA; when thymine dimers are present, this polymerase inserts the complementary nucleotides in the newly synthesized DNA, thereby bypassing the lesion and suppressing the mutagenic effect of UV-in…	chr6:43576185-43620523
g	G4	5280378	5465	H. sapiens	5465	H. sapiens	PPARA	NR1C1|PPAR|PPARalpha|hPPAR	protein-coding	peroxisome proliferator activated receptor alpha	Peroxisome proliferators include hypolipidemic drugs, herbicides, leukotriene antagonists, and plasticizers; this term arises because they induce an increase in the size and number of peroxisomes. Peroxisomes are subcellular organelles found in plants and animals that contain enzymes for respiration and for cholesterol and lipid metabolism. The action of peroxisome proliferators is thought to be …	chr22:46150795-46243756;chr22:46150534-46243756;chr22:46150526-46243755
g	G3	5282073	5465	H. sapiens	5465	H. sapiens	PPARA	NR1C1|PPAR|PPARalpha|hPPAR	protein-coding	peroxisome proliferator activated receptor alpha	Peroxisome proliferators include hypolipidemic drugs, herbicides, leukotriene antagonists, and plasticizers; this term arises because they induce an increase in the size and number of peroxisomes. Peroxisomes are subcellular organelles found in plants and animals that contain enzymes for respiration and for cholesterol and lipid metabolism. The action of peroxisome proliferators is thought to be …	chr22:46150795-46243756;chr22:46150534-46243756;chr22:46150526-46243755
g	G1	14982	5467	H. sapiens	5467	H. sapiens	PPARD	FAAR|NR1C2|NUC1|NUCI|NUCII|PPARB	protein-coding	peroxisome proliferator activated receptor delta	This gene encodes a member of the peroxisome proliferator-activated receptor (PPAR) family. The encoded protein is thought to function as an integrator of transcriptional repression and nuclear receptor signaling. It may inhibit the ligand-induced transcriptional activity of peroxisome proliferator activated receptors alpha and gamma, though evidence for this effect is inconsistent. Expression of…	chr6:35342558-35428178;chr6:35342558-35428191;chr6:35342558-35425400
g	G4	5280378	5467	H. sapiens	5467	H. sapiens	PPARD	FAAR|NR1C2|NUC1|NUCI|NUCII|PPARB	protein-coding	peroxisome proliferator activated receptor delta	This gene encodes a member of the peroxisome proliferator-activated receptor (PPAR) family. The encoded protein is thought to function as an integrator of transcriptional repression and nuclear receptor signaling. It may inhibit the ligand-induced transcriptional activity of peroxisome proliferator activated receptors alpha and gamma, though evidence for this effect is inconsistent. Expression of…	chr6:35342558-35428178;chr6:35342558-35428191;chr6:35342558-35425400
g	G3	5282073	5467	H. sapiens	5467	H. sapiens	PPARD	FAAR|NR1C2|NUC1|NUCI|NUCII|PPARB	protein-coding	peroxisome proliferator activated receptor delta	This gene encodes a member of the peroxisome proliferator-activated receptor (PPAR) family. The encoded protein is thought to function as an integrator of transcriptional repression and nuclear receptor signaling. It may inhibit the ligand-induced transcriptional activity of peroxisome proliferator activated receptors alpha and gamma, though evidence for this effect is inconsistent. Expression of…	chr6:35342558-35428178;chr6:35342558-35428191;chr6:35342558-35425400
g	G4	5280378	5468	H. sapiens	5468	H. sapiens	PPARG	CIMT1|GLM1|NR1C3|PPARG1|PPARG2|PPARgamma	protein-coding	peroxisome proliferator activated receptor gamma	This gene encodes a member of the peroxisome proliferator-activated receptor (PPAR) subfamily of nuclear receptors. PPARs form heterodimers with retinoid X receptors (RXRs) and these heterodimers regulate transcription of various genes. Three subtypes of PPARs are known: PPAR-alpha, PPAR-delta, and PPAR-gamma. The protein encoded by this gene is PPAR-gamma and is a regulator of adipocyte differen…	chr3:12287884-12434343;chr3:12289070-12434343;chr3:12351417-12410425;chr3:12351417-12434343;chr3:12287485-12434343;chr3:12289070-12410425;chr3:12301632-12434343;chr3:12301919-12434343
g	G3	5282073	5468	H. sapiens	5468	H. sapiens	PPARG	CIMT1|GLM1|NR1C3|PPARG1|PPARG2|PPARgamma	protein-coding	peroxisome proliferator activated receptor gamma	This gene encodes a member of the peroxisome proliferator-activated receptor (PPAR) subfamily of nuclear receptors. PPARs form heterodimers with retinoid X receptors (RXRs) and these heterodimers regulate transcription of various genes. Three subtypes of PPARs are known: PPAR-alpha, PPAR-delta, and PPAR-gamma. The protein encoded by this gene is PPAR-gamma and is a regulator of adipocyte differen…	chr3:12287884-12434343;chr3:12289070-12434343;chr3:12351417-12410425;chr3:12351417-12434343;chr3:12287485-12434343;chr3:12289070-12410425;chr3:12301632-12434343;chr3:12301919-12434343
g	G5	5319000	5468	H. sapiens	5468	H. sapiens	PPARG	CIMT1|GLM1|NR1C3|PPARG1|PPARG2|PPARgamma	protein-coding	peroxisome proliferator activated receptor gamma	This gene encodes a member of the peroxisome proliferator-activated receptor (PPAR) subfamily of nuclear receptors. PPARs form heterodimers with retinoid X receptors (RXRs) and these heterodimers regulate transcription of various genes. Three subtypes of PPARs are known: PPAR-alpha, PPAR-delta, and PPAR-gamma. The protein encoded by this gene is PPAR-gamma and is a regulator of adipocyte differen…	chr3:12287884-12434343;chr3:12289070-12434343;chr3:12351417-12410425;chr3:12351417-12434343;chr3:12287485-12434343;chr3:12289070-12410425;chr3:12301632-12434343;chr3:12301919-12434343
g	G1	14982	5530	H. sapiens	5530	H. sapiens	PPP3CA	ACCIID|CALN|CALNA|CALNA1|CCN1|CNA1|IECEE|IECEE1|PPP2B	protein-coding	protein phosphatase 3 catalytic subunit alpha		chr4:101023418-101347526
g	G1	14982	5578	H. sapiens	5578	H. sapiens	PRKCA	AAG6|PKC-alpha|PKCA|PKCI+/-|PKCalpha|PRKACA	protein-coding	protein kinase C alpha	Protein kinase C (PKC) is a family of serine- and threonine-specific protein kinases that can be activated by calcium and the second messenger diacylglycerol. PKC family members phosphorylate a wide variety of protein targets and are known to be involved in diverse cellular signaling pathways. PKC family members also serve as major receptors for phorbol esters, a class of tumor promoters. Each me…	chr17:66302613-66810743
g	G1	14982	5594	H. sapiens	5594	H. sapiens	MAPK1	ERK|ERK-2|ERK2|ERT1|MAPK2|P42MAPK|PRKM1|PRKM2|p38|p40|p41|p41mapk|p42-MAPK	protein-coding	mitogen-activated protein kinase 1	This gene encodes a member of the MAP kinase family. MAP kinases, also known as extracellular signal-regulated kinases (ERKs), act as an integration point for multiple biochemical signals, and are involved in a wide variety of cellular processes such as proliferation, differentiation, transcription regulation and development. The activation of this kinase requires its phosphorylation by upstream …	chr22:21769030-21867680;chr22:21759658-21867645
g	G3	5282073	5594	H. sapiens	5594	H. sapiens	MAPK1	ERK|ERK-2|ERK2|ERT1|MAPK2|P42MAPK|PRKM1|PRKM2|p38|p40|p41|p41mapk|p42-MAPK	protein-coding	mitogen-activated protein kinase 1	This gene encodes a member of the MAP kinase family. MAP kinases, also known as extracellular signal-regulated kinases (ERKs), act as an integration point for multiple biochemical signals, and are involved in a wide variety of cellular processes such as proliferation, differentiation, transcription regulation and development. The activation of this kinase requires its phosphorylation by upstream …	chr22:21769030-21867680;chr22:21759658-21867645
g	G1	14982	5595	H. sapiens	5595	H. sapiens	MAPK3	ERK-1|ERK1|ERT2|HS44KDAP|HUMKER1A|P44ERK1|P44MAPK|PRKM3|p44-ERK1|p44-MAPK	protein-coding	mitogen-activated protein kinase 3	The protein encoded by this gene is a member of the MAP kinase family. MAP kinases, also known as extracellular signal-regulated kinases (ERKs), act in a signaling cascade that regulates various cellular processes such as proliferation, differentiation, and cell cycle progression in response to a variety of extracellular signals. This kinase is activated by upstream kinases, resulting in its tran…	chr16:30114105-30123309;chr16:30116837-30123220;chr16:30114105-30123220
am	AM1	5281426	5650	H. sapiens	5650	H. sapiens	KLK7	PRSS6|SCCE|hK7	protein-coding	kallikrein related peptidase 7	This gene encodes a member of the kallikrein subfamily of serine proteases. These enzymes have diverse physiological functions and many kallikrein genes are biomarkers for cancer. The encoded protein has chymotrypsin-like activity and plays a role in the proteolysis of intercellular cohesive structures that precedes desquamation, the shedding of the outermost layer of the epidermis. The encoded p…	chr19:50976468-50983917;chr19:50976479-50983815;chr19:50976479-50984064
g	G1	14982	5724	H. sapiens	5724	H. sapiens	PTAFR	PAFR	protein-coding	platelet activating factor receptor	This gene encodes a seven-transmembrane G-protein-coupled receptor for platelet-activating factor (PAF) that localizes to lipid rafts and/or caveolae in the cell membrane. PAF (1-0-alkyl-2-acetyl-sn-glycero-3-phosphorylcholine) is a phospholipid that plays a significant role in oncogenic transformation, tumor growth, angiogenesis, metastasis, and pro-inflammatory processes. Binding of PAF to the …	chr1:28147166-28193856;chr1:28147166-28193936;chr1:28147166-28176690
g	G1	14982	5742	H. sapiens	5742	H. sapiens	PTGS1	COX1|COX3|PCOX1|PES-1|PGG/HS|PGHS-1|PGHS1|PHS1|PTGHS	protein-coding	prostaglandin-endoperoxide synthase 1	This is one of two genes encoding similar enzymes that catalyze the conversion of arachinodate to prostaglandin. The encoded protein regulates angiogenesis in endothelial cells, and is inhibited by nonsteroidal anti-inflammatory drugs such as aspirin. Based on its ability to function as both a cyclooxygenase and as a peroxidase, the encoded protein has been identified as a moonlighting protein. T…	chr9:122371024-122395703;chr9:122370533-122395703;chr9:122375302-122395703
m	M2	5281792	5742	H. sapiens	5742	H. sapiens	PTGS1	COX1|COX3|PCOX1|PES-1|PGG/HS|PGHS-1|PGHS1|PHS1|PTGHS	protein-coding	prostaglandin-endoperoxide synthase 1	This is one of two genes encoding similar enzymes that catalyze the conversion of arachinodate to prostaglandin. The encoded protein regulates angiogenesis in endothelial cells, and is inhibited by nonsteroidal anti-inflammatory drugs such as aspirin. Based on its ability to function as both a cyclooxygenase and as a peroxidase, the encoded protein has been identified as a moonlighting protein. T…	chr9:122371024-122395703;chr9:122370533-122395703;chr9:122375302-122395703
z	Z1	442793	5742	H. sapiens	5742	H. sapiens	PTGS1	COX1|COX3|PCOX1|PES-1|PGG/HS|PGHS-1|PGHS1|PHS1|PTGHS	protein-coding	prostaglandin-endoperoxide synthase 1	This is one of two genes encoding similar enzymes that catalyze the conversion of arachinodate to prostaglandin. The encoded protein regulates angiogenesis in endothelial cells, and is inhibited by nonsteroidal anti-inflammatory drugs such as aspirin. Based on its ability to function as both a cyclooxygenase and as a peroxidase, the encoded protein has been identified as a moonlighting protein. T…	chr9:122371024-122395703;chr9:122370533-122395703;chr9:122375302-122395703
am	AM2	155948	5742	H. sapiens	5742	H. sapiens	PTGS1	COX1|COX3|PCOX1|PES-1|PGG/HS|PGHS-1|PGHS1|PHS1|PTGHS	protein-coding	prostaglandin-endoperoxide synthase 1	This is one of two genes encoding similar enzymes that catalyze the conversion of arachinodate to prostaglandin. The encoded protein regulates angiogenesis in endothelial cells, and is inhibited by nonsteroidal anti-inflammatory drugs such as aspirin. Based on its ability to function as both a cyclooxygenase and as a peroxidase, the encoded protein has been identified as a moonlighting protein. T…	chr9:122371024-122395703;chr9:122370533-122395703;chr9:122375302-122395703
g	G1	14982	5743	H. sapiens	5743	H. sapiens	PTGS2	COX-2|COX2|GRIPGHS|PGG/HS|PGHS-2|PHS-2|hCox-2	protein-coding	prostaglandin-endoperoxide synthase 2	Prostaglandin-endoperoxide synthase (PTGS), also known as cyclooxygenase, is the key enzyme in prostaglandin biosynthesis, and acts both as a dioxygenase and as a peroxidase. There are two isozymes of PTGS: a constitutive PTGS1 and an inducible PTGS2, which differ in their regulation of expression and tissue distribution. This gene encodes the inducible isozyme. It is regulated by specific stimul…	chr1:186671791-186680423
am	AM1	5281426	5743	H. sapiens	5743	H. sapiens	PTGS2	COX-2|COX2|GRIPGHS|PGG/HS|PGHS-2|PHS-2|hCox-2	protein-coding	prostaglandin-endoperoxide synthase 2	Prostaglandin-endoperoxide synthase (PTGS), also known as cyclooxygenase, is the key enzyme in prostaglandin biosynthesis, and acts both as a dioxygenase and as a peroxidase. There are two isozymes of PTGS: a constitutive PTGS1 and an inducible PTGS2, which differ in their regulation of expression and tissue distribution. This gene encodes the inducible isozyme. It is regulated by specific stimul…	chr1:186671791-186680423
m	M2	5281792	5743	H. sapiens	5743	H. sapiens	PTGS2	COX-2|COX2|GRIPGHS|PGG/HS|PGHS-2|PHS-2|hCox-2	protein-coding	prostaglandin-endoperoxide synthase 2	Prostaglandin-endoperoxide synthase (PTGS), also known as cyclooxygenase, is the key enzyme in prostaglandin biosynthesis, and acts both as a dioxygenase and as a peroxidase. There are two isozymes of PTGS: a constitutive PTGS1 and an inducible PTGS2, which differ in their regulation of expression and tissue distribution. This gene encodes the inducible isozyme. It is regulated by specific stimul…	chr1:186671791-186680423
z	Z1	442793	5743	H. sapiens	5743	H. sapiens	PTGS2	COX-2|COX2|GRIPGHS|PGG/HS|PGHS-2|PHS-2|hCox-2	protein-coding	prostaglandin-endoperoxide synthase 2	Prostaglandin-endoperoxide synthase (PTGS), also known as cyclooxygenase, is the key enzyme in prostaglandin biosynthesis, and acts both as a dioxygenase and as a peroxidase. There are two isozymes of PTGS: a constitutive PTGS1 and an inducible PTGS2, which differ in their regulation of expression and tissue distribution. This gene encodes the inducible isozyme. It is regulated by specific stimul…	chr1:186671791-186680423
g	G1	14982	5770	H. sapiens	5770	H. sapiens	PTPN1	PTP1B	protein-coding	protein tyrosine phosphatase non-receptor type 1	The protein encoded by this gene is the founding member of the protein tyrosine phosphatase (PTP) family, which was isolated and identified based on its enzymatic activity and amino acid sequence. PTPs catalyze the hydrolysis of the phosphate monoesters specifically on tyrosine residues. Members of the PTP family share a highly conserved catalytic motif, which is essential for the catalytic activ…	chr20:50510383-50585240;chr20:50510321-50584762
g	G3	5282073	5770	H. sapiens	5770	H. sapiens	PTPN1	PTP1B	protein-coding	protein tyrosine phosphatase non-receptor type 1	The protein encoded by this gene is the founding member of the protein tyrosine phosphatase (PTP) family, which was isolated and identified based on its enzymatic activity and amino acid sequence. PTPs catalyze the hydrolysis of the phosphate monoesters specifically on tyrosine residues. Members of the PTP family share a highly conserved catalytic motif, which is essential for the catalytic activ…	chr20:50510383-50585240;chr20:50510321-50584762
g	G5	5319000	5770	H. sapiens	5770	H. sapiens	PTPN1	PTP1B	protein-coding	protein tyrosine phosphatase non-receptor type 1	The protein encoded by this gene is the founding member of the protein tyrosine phosphatase (PTP) family, which was isolated and identified based on its enzymatic activity and amino acid sequence. PTPs catalyze the hydrolysis of the phosphate monoesters specifically on tyrosine residues. Members of the PTP family share a highly conserved catalytic motif, which is essential for the catalytic activ…	chr20:50510383-50585240;chr20:50510321-50584762
g	G1	14982	5788	H. sapiens	5788	H. sapiens	PTPRC	B220|CD45|CD45R|GP180|L-CA|LCA|LY5|T200	protein-coding	protein tyrosine phosphatase receptor type C	The protein encoded by this gene is a member of the protein tyrosine phosphatase (PTP) family. PTPs are known to be signaling molecules that regulate a variety of cellular processes including cell growth, differentiation, mitosis, and oncogenic transformation. This PTP contains an extracellular domain, a single transmembrane segment and two tandem intracytoplasmic catalytic domains, and thus is c…	chr1:198639040-198695171;chr1:198638968-198757476;chr1_GL383520v2_alt:280373-363885;chr1:198639040-198757476;chr1_GL383520v2_alt:280445-336576;chr1_GL383520v2_alt:280445-334610;chr1:198639040-198693205;chr1_GL383520v2_alt:280445-363885
am	AM1	5281426	5901	H. sapiens	5901	H. sapiens	RAN	ARA24|Gsp1|TC4	protein-coding	RAN, member RAS oncogene family	RAN (ras-related nuclear protein) is a small GTP binding protein belonging to the RAS superfamily that is essential for the translocation of RNA and proteins through the nuclear pore complex. The RAN protein is also involved in control of DNA synthesis and cell cycle progression. Nuclear localization of RAN requires the presence of regulator of chromosome condensation 1 (RCC1). Mutations in RAN d…	chr12:130872066-130877678;chr12:130871994-130877678
g	G4	5280378	5901	H. sapiens	5901	H. sapiens	RAN	ARA24|Gsp1|TC4	protein-coding	RAN, member RAS oncogene family	RAN (ras-related nuclear protein) is a small GTP binding protein belonging to the RAS superfamily that is essential for the translocation of RNA and proteins through the nuclear pore complex. The RAN protein is also involved in control of DNA synthesis and cell cycle progression. Nuclear localization of RAN requires the presence of regulator of chromosome condensation 1 (RCC1). Mutations in RAN d…	chr12:130872066-130877678;chr12:130871994-130877678
g	G4	5280378	5914	H. sapiens	5914	H. sapiens	RARA	NR1B1|RAR	protein-coding	retinoic acid receptor alpha	This gene represents a nuclear retinoic acid receptor. The encoded protein, retinoic acid receptor alpha, regulates transcription in a ligand-dependent manner. This gene has been implicated in regulation of development, differentiation, apoptosis, granulopoeisis, and transcription of clock genes. Translocations between this locus and several other loci have been associated with acute promyelocyti…	chr17:40318245-40357643;chr17:40342166-40357643;chr17:40309180-40357643
m	M2	5281792	5965	H. sapiens	5965	H. sapiens	RECQL	RECQL1|RecQ1	protein-coding	RecQ like helicase	The protein encoded by this gene is a member of the RecQ DNA helicase family. DNA helicases are enzymes involved in various types of DNA repair, including mismatch repair, nucleotide excision repair and direct repair. The encoded protein is involved in the processing of Holliday junctions, the suppression of sister chromatid exchanges, telomere maintenance, and is required for genotoxic stress re…	chr12:21468910-21501669;chr12:21468910-21501635
m	M2	5315615	5965	H. sapiens	5965	H. sapiens	RECQL	RECQL1|RecQ1	protein-coding	RecQ like helicase	The protein encoded by this gene is a member of the RecQ DNA helicase family. DNA helicases are enzymes involved in various types of DNA repair, including mismatch repair, nucleotide excision repair and direct repair. The encoded protein is involved in the processing of Holliday junctions, the suppression of sister chromatid exchanges, telomere maintenance, and is required for genotoxic stress re…	chr12:21468910-21501669;chr12:21468910-21501635
g	G4	5280378	5970	H. sapiens	5970	H. sapiens	RELA	CMCU|NFKB3|p65	protein-coding	RELA proto-oncogene, NF-kB subunit	NF-kappa-B is a ubiquitous transcription factor involved in several biological processes. It is held in the cytoplasm in an inactive state by specific inhibitors. Upon degradation of the inhibitor, NF-kappa-B moves to the nucleus and activates transcription of specific genes. NF-kappa-B is composed of NFKB1 or NFKB2 bound to either REL, RELA, or RELB. The most abundant form of NF-kappa-B is NFKB1…	chr11:65653601-65662916;chr11:65653596-65662972
z	Z1	442793	5999	H. sapiens	5999	H. sapiens	RGS4	RGP4|SCZD9	protein-coding	regulator of G protein signaling 4	Regulator of G protein signaling (RGS) family members are regulatory molecules that act as GTPase activating proteins (GAPs) for G alpha subunits of heterotrimeric G proteins. RGS proteins are able to deactivate G protein subunits of the Gi alpha, Go alpha and Gq alpha subtypes. They drive G proteins into their inactive GDP-bound forms. Regulator of G protein signaling 4 belongs to this family. A…	chr1:163071905-163076802;chr1:163068974-163076802;chr1:163069254-163076802;chr1:163068606-163076802
m	M2	5281792	6000	H. sapiens	6000	H. sapiens	RGS7		protein-coding	regulator of G protein signaling 7		chr1:240774742-241357205;chr1:240775514-241357230;chr1:240775514-241355826;chr1:240775514-241357205;chr1:240774742-241356958
m	M2	5281792	6002	H. sapiens	6002	H. sapiens	RGS12		protein-coding	regulator of G protein signaling 12	This gene encodes a member of the 'regulator of G protein signaling' (RGS) gene family. The encoded protein may function as a guanosine triphosphatase (GTPase)-activating protein as well as a transcriptional repressor. This protein may play a role in tumorigenesis. Multiple transcript variants encoding distinct isoforms have been identified for this gene. Other alternative splice variants have be…	chr4:3370198-3439913;chr4:3314147-3432177;chr4:3314147-3439913
g	G4	5280378	6256	H. sapiens	6256	H. sapiens	RXRA	NR2B1	protein-coding	retinoid X receptor alpha	Retinoid X receptors (RXRs) and retinoic acid receptors (RARs) are nuclear receptors that mediate the biological effects of retinoids by their involvement in retinoic acid-mediated gene activation. These receptors function as transcription factors by binding as homodimers or heterodimers to specific sequences in the promoters of target genes. The protein encoded by this gene is a member of the st…	chr9:134326455-134440585;chr9:134406560-134440585;chr9:134379295-134440586
m	M2	5315615	6495	H. sapiens	6495	H. sapiens	SIX1	BOS3|DFNA23|TIP39	protein-coding	SIX homeobox 1	The protein encoded by this gene is a homeobox protein that is similar to the Drosophila 'sine oculis' gene product. This gene is found in a cluster of related genes on chromosome 14 and is thought to be involved in limb development. Defects in this gene are a cause of autosomal dominant deafness type 23 (DFNA23) and branchiootic syndrome type 3 (BOS3). [provided by RefSeq, Jul 2008]	chr14:60643433-60649477
g	G4	5280378	6523	H. sapiens	6523	H. sapiens	SLC5A1	D22S675|NAGT|SGLT1	protein-coding	solute carrier family 5 member 1	This gene encodes a member of the sodium-dependent glucose transporter (SGLT) family. The encoded integral membrane protein is the primary mediator of dietary glucose and galactose uptake from the intestinal lumen. Mutations in this gene have been associated with glucose-galactose malabsorption. Multiple transcript variants encoding different isoforms have been found for this gene. [provided by R…	chr22:32059170-32113024;chr22:32043261-32113024
g	G4	5280378	6524	H. sapiens	6524	H. sapiens	SLC5A2	SGLT2	protein-coding	solute carrier family 5 member 2	This gene encodes a member of the sodium glucose cotransporter family which are sodium-dependent glucose transport proteins. The encoded protein is the major cotransporter involved in glucose reabsorption in the kidney. Mutations in this gene are associated with renal glucosuria. Two transcript variants, one protein-coding and one not, have been found for this gene. [provided by RefSeq, Feb 2015]	chr16:31483123-31490769
g	G1	14982	6530	H. sapiens	6530	H. sapiens	SLC6A2	NAT1|NET|NET1|SLC6A5	protein-coding	solute carrier family 6 member 2	This gene encodes a member of the sodium:neurotransmitter symporter family. This member is a multi-pass membrane protein, which is responsible for reuptake of norepinephrine into presynaptic nerve terminals and is a regulator of norepinephrine homeostasis. Mutations in this gene cause orthostatic intolerance, a syndrome characterized by lightheadedness, fatigue, altered mentation and syncope. Alt…	chr16:55656440-55703788;chr16:55671671-55703788;chr16:55656064-55703795;chr16:55656644-55706192
g	G1	14982	6531	H. sapiens	6531	H. sapiens	SLC6A3	DAT|DAT1|PKDYS|PKDYS1	protein-coding	solute carrier family 6 member 3	This gene encodes a dopamine transporter which is a member of the sodium- and chloride-dependent neurotransmitter transporter family. The 3' UTR of this gene contains a 40 bp tandem repeat, referred to as a variable number tandem repeat or VNTR, which can be present in 3 to 11 copies. Variation in the number of repeats is associated with idiopathic epilepsy, attention-deficit hyperactivity disord…	chr5_KI270791v1_alt:64333-121212;chr5:1392796-1445440
g	G1	14982	6532	H. sapiens	6532	H. sapiens	SLC6A4	5-HTT|5-HTTLPR|5HTT|HTT|OCD1|SERT|SERT1|hSERT	protein-coding	solute carrier family 6 member 4	This gene encodes an integral membrane protein that transports the neurotransmitter serotonin from synaptic spaces into presynaptic neurons. The encoded protein terminates the action of serotonin and recycles it in a sodium-dependent manner. This protein is a target of psychomotor stimulants, such as amphetamines and cocaine, and is a member of the sodium:neurotransmitter symporter family. A repe…	chr17:30194319-30235697
g	G1	14982	6579	H. sapiens	6579	H. sapiens	SLCO1A2	OATP|OATP-A|OATP1A2|SLC21A3	protein-coding	solute carrier organic anion transporter family member 1A2	This gene encodes a sodium-independent transporter which mediates cellular uptake of organic ions in the liver. Its substrates include bile acids, bromosulphophthalein, and some steroidal compounds. The protein is a member of the SLC21A family of solute carriers. Alternative splicing of this gene results in multiple transcript variants. [provided by RefSeq, Dec 2008]	chr12:21264600-21334917;chr12:21264600-21395437
g	G4	5280378	6607	H. sapiens	6607	H. sapiens	SMN2	BCD541|C-BCD541|GEMIN1|SMNC|TDRD16B	protein-coding	survival of motor neuron 2, centromeric	This gene is part of a 500 kb inverted duplication on chromosome 5q13. This duplicated region contains at least four genes and repetitive elements which make it prone to rearrangements and deletions. The repetitiveness and complexity of the sequence have also caused difficulty in determining the organization of this genomic region. The telomeric and centromeric copies of this gene are nearly iden…	chr5:70924941-70953015;chr5:70049669-70077595;chr5:70925087-70953015;chr5_KI270897v1_alt:275008-302936;chr5_KI270897v1_alt:473522-501447;chr5_KI270897v1_alt:473376-501447;chr5_GL339449v2_alt:457776-485700;chr5:70049523-70077595;chr5_GL339449v2_alt:457776-485846;chr5_KI270897v1_alt:274862-302936
g	G3	5282073	6607	H. sapiens	6607	H. sapiens	SMN2	BCD541|C-BCD541|GEMIN1|SMNC|TDRD16B	protein-coding	survival of motor neuron 2, centromeric	This gene is part of a 500 kb inverted duplication on chromosome 5q13. This duplicated region contains at least four genes and repetitive elements which make it prone to rearrangements and deletions. The repetitiveness and complexity of the sequence have also caused difficulty in determining the organization of this genomic region. The telomeric and centromeric copies of this gene are nearly iden…	chr5:70924941-70953015;chr5:70049669-70077595;chr5:70925087-70953015;chr5_KI270897v1_alt:275008-302936;chr5_KI270897v1_alt:473522-501447;chr5_KI270897v1_alt:473376-501447;chr5_GL339449v2_alt:457776-485700;chr5:70049523-70077595;chr5_GL339449v2_alt:457776-485846;chr5_KI270897v1_alt:274862-302936
am	AM1	5281426	6609	H. sapiens	6609	H. sapiens	SMPD1	ASM|ASMASE|NPD	protein-coding	sphingomyelin phosphodiesterase 1	The protein encoded by this gene is a lysosomal acid sphingomyelinase that converts sphingomyelin to ceramide. The encoded protein also has phospholipase C activity. Defects in this gene are a cause of Niemann-Pick disease type A (NPA) and Niemann-Pick disease type B (NPB). Multiple transcript variants encoding different isoforms have been identified. [provided by RefSeq, Jul 2010]	chr11:6390474-6394996
b	B3	44202892	6609	H. sapiens	6609	H. sapiens	SMPD1	ASM|ASMASE|NPD	protein-coding	sphingomyelin phosphodiesterase 1	The protein encoded by this gene is a lysosomal acid sphingomyelinase that converts sphingomyelin to ceramide. The encoded protein also has phospholipase C activity. Defects in this gene are a cause of Niemann-Pick disease type A (NPA) and Niemann-Pick disease type B (NPB). Multiple transcript variants encoding different isoforms have been identified. [provided by RefSeq, Jul 2010]	chr11:6390474-6394996
m	M3	8768	6609	H. sapiens	6609	H. sapiens	SMPD1	ASM|ASMASE|NPD	protein-coding	sphingomyelin phosphodiesterase 1	The protein encoded by this gene is a lysosomal acid sphingomyelinase that converts sphingomyelin to ceramide. The encoded protein also has phospholipase C activity. Defects in this gene are a cause of Niemann-Pick disease type A (NPA) and Niemann-Pick disease type B (NPB). Multiple transcript variants encoding different isoforms have been identified. [provided by RefSeq, Jul 2010]	chr11:6390474-6394996
g	G4	5280378	6609	H. sapiens	6609	H. sapiens	SMPD1	ASM|ASMASE|NPD	protein-coding	sphingomyelin phosphodiesterase 1	The protein encoded by this gene is a lysosomal acid sphingomyelinase that converts sphingomyelin to ceramide. The encoded protein also has phospholipase C activity. Defects in this gene are a cause of Niemann-Pick disease type A (NPA) and Niemann-Pick disease type B (NPB). Multiple transcript variants encoding different isoforms have been identified. [provided by RefSeq, Jul 2010]	chr11:6390474-6394996
m	M2	5315615	6609	H. sapiens	6609	H. sapiens	SMPD1	ASM|ASMASE|NPD	protein-coding	sphingomyelin phosphodiesterase 1	The protein encoded by this gene is a lysosomal acid sphingomyelinase that converts sphingomyelin to ceramide. The encoded protein also has phospholipase C activity. Defects in this gene are a cause of Niemann-Pick disease type A (NPA) and Niemann-Pick disease type B (NPB). Multiple transcript variants encoding different isoforms have been identified. [provided by RefSeq, Jul 2010]	chr11:6390474-6394996
g	G2	442813	6609	H. sapiens	6609	H. sapiens	SMPD1	ASM|ASMASE|NPD	protein-coding	sphingomyelin phosphodiesterase 1	The protein encoded by this gene is a lysosomal acid sphingomyelinase that converts sphingomyelin to ceramide. The encoded protein also has phospholipase C activity. Defects in this gene are a cause of Niemann-Pick disease type A (NPA) and Niemann-Pick disease type B (NPB). Multiple transcript variants encoding different isoforms have been identified. [provided by RefSeq, Jul 2010]	chr11:6390474-6394996
b	B2	44202895	6609	H. sapiens	6609	H. sapiens	SMPD1	ASM|ASMASE|NPD	protein-coding	sphingomyelin phosphodiesterase 1	The protein encoded by this gene is a lysosomal acid sphingomyelinase that converts sphingomyelin to ceramide. The encoded protein also has phospholipase C activity. Defects in this gene are a cause of Niemann-Pick disease type A (NPA) and Niemann-Pick disease type B (NPB). Multiple transcript variants encoding different isoforms have been identified. [provided by RefSeq, Jul 2010]	chr11:6390474-6394996
g	G2	3733033	6609	H. sapiens	6609	H. sapiens	SMPD1	ASM|ASMASE|NPD	protein-coding	sphingomyelin phosphodiesterase 1	The protein encoded by this gene is a lysosomal acid sphingomyelinase that converts sphingomyelin to ceramide. The encoded protein also has phospholipase C activity. Defects in this gene are a cause of Niemann-Pick disease type A (NPA) and Niemann-Pick disease type B (NPB). Multiple transcript variants encoding different isoforms have been identified. [provided by RefSeq, Jul 2010]	chr11:6390474-6394996
am	AM1	5281426	6652	H. sapiens	6652	H. sapiens	SORD	HEL-S-95n|RDH|SDH|SORD1|XDH	protein-coding	sorbitol dehydrogenase	Sorbitol dehydrogenase (SORD; EC 1.1.1.14) catalyzes the interconversion of polyols and their corresponding ketoses, and together with aldose reductase (ALDR1; MIM 103880), makes up the sorbitol pathway that is believed to play an important role in the development of diabetic complications (summarized by Carr and Markham, 1995 [PubMed 8535074]). The first reaction of the pathway (also called the …	chr15:45023195-45077185
m	M2	5281792	6714	H. sapiens	6714	H. sapiens	SRC	ASV|SRC1|THC6|c-SRC|p60-Src	protein-coding	SRC proto-oncogene, non-receptor tyrosine kinase	This gene is highly similar to the v-src gene of Rous sarcoma virus. This proto-oncogene may play a role in the regulation of embryonic development and cell growth. The protein encoded by this gene is a tyrosine-protein kinase whose activity can be inhibited by phosphorylation by c-SRC kinase. Mutations in this gene could be involved in the malignant progression of colon cancer. Two transcript va…	chr20:37344685-37405432;chr20:37346128-37405432
am	AM1	5281426	6715	H. sapiens	6715	H. sapiens	SRD5A1	S5AR 1	protein-coding	steroid 5 alpha-reductase 1	Steroid 5-alpha-reductase (EC 1.3.99.5) catalyzes the conversion of testosterone into the more potent androgen, dihydrotestosterone (DHT). Also see SRD5A2 (MIM 607306).[supplied by OMIM, Mar 2008]	chr5:6633440-6674383
m	M2	5281792	6772	H. sapiens	6772	H. sapiens	STAT1	CANDF7|IMD31A|IMD31B|IMD31C|ISGF-3|STAT91	protein-coding	signal transducer and activator of transcription 1	The protein encoded by this gene is a member of the STAT protein family. In response to cytokines and growth factors, STAT family members are phosphorylated by the receptor associated kinases, and then form homo- or heterodimers that translocate to the cell nucleus where they act as transcription activators. This protein can be activated by various ligands including interferon-alpha, interferon-g…	chr2:190969149-191014171;chr2:190975537-191014250
m	M2	5281792	6774	H. sapiens	6774	H. sapiens	STAT3	ADMIO|ADMIO1|APRF|HIES	protein-coding	signal transducer and activator of transcription 3	The protein encoded by this gene is a member of the STAT protein family. In response to cytokines and growth factors, STAT family members are phosphorylated by the receptor associated kinases, and then form homo- or heterodimers that translocate to the cell nucleus where they act as transcription activators. This protein is activated through phosphorylation in response to various cytokines and gr…	chr17:42313324-42388442;chr17:42313325-42388495
m	M2	5281792	6777	H. sapiens	6777	H. sapiens	STAT5B	STAT5	protein-coding	signal transducer and activator of transcription 5B	The protein encoded by this gene is a member of the STAT family of transcription factors. In response to cytokines and growth factors, STAT family members are phosphorylated by the receptor associated kinases, and then form homo- or heterodimers that translocate to the cell nucleus where they act as transcription activators. This protein mediates the signal transduction triggered by various cell …	chr17:42199177-42276391
g	G1	14982	6865	H. sapiens	6865	H. sapiens	TACR2	NK2R|NKNAR|SKR|TAC2R	protein-coding	tachykinin receptor 2	This gene belongs to a family of genes that function as receptors for tachykinins. Receptor affinities are specified by variations in the 5'-end of the sequence. The receptors belonging to this family are characterized by interactions with G proteins and 7 hydrophobic transmembrane regions. This gene encodes the receptor for the tachykinin neuropeptide substance K, also referred to as neurokinin …	chr10:69403903-69416918
g	G1	14982	6869	H. sapiens	6869	H. sapiens	TACR1	NK1R|NKIR|SPR|TAC1R	protein-coding	tachykinin receptor 1	This gene belongs to a gene family of tachykinin receptors. These tachykinin receptors are characterized by interactions with G proteins and contain seven hydrophobic transmembrane regions. This gene encodes the receptor for the tachykinin substance P, also referred to as neurokinin 1. The encoded protein is also involved in the mediation of phosphatidylinositol metabolism of substance P. [provid…	chr2:75046463-75199520;chr2:75051036-75199520
g	G1	14982	6916	H. sapiens	6916	H. sapiens	TBXAS1	BDPLT14|CYP5|CYP5A1|GHOSAL|THAS|TS|TXAS|TXS	protein-coding	thromboxane A synthase 1	This gene encodes a member of the cytochrome P450 superfamily of enzymes. The cytochrome P450 proteins are monooxygenases which catalyze many reactions involved in drug metabolism and synthesis of cholesterol, steroids and other lipids. However, this protein is considered a member of the cytochrome P450 superfamily on the basis of sequence similarity rather than functional similarity. This endopl…	chr7:139778242-140020320;chr7:139829264-139914029;chr7:139829264-140020320;chr7:139778242-139797486;chr7:139829264-140020293
m	M2	5281792	7068	H. sapiens	7068	H. sapiens	THRB	C-ERBA-2|C-ERBA-BETA|ERBA2|GRTH|NR1A2|PRTH|THR1|THRB1|THRB2	protein-coding	thyroid hormone receptor beta	The protein encoded by this gene is a nuclear hormone receptor for triiodothyronine. It is one of the several receptors for thyroid hormone, and has been shown to mediate the biological activities of thyroid hormone. Knockout studies in mice suggest that the different receptors, while having certain extent of redundancy, may mediate different functions of thyroid hormone. Mutations in this gene a…	chr3:24117154-24494850;chr3:24117154-24495708
g	G1	14982	7157	H. sapiens	7157	H. sapiens	TP53	BCC7|BMFS5|LFS1|P53|TRP53	protein-coding	tumor protein p53	This gene encodes a tumor suppressor protein containing transcriptional activation, DNA binding, and oligomerization domains. The encoded protein responds to diverse cellular stresses to regulate expression of target genes, thereby inducing cell cycle arrest, apoptosis, senescence, DNA repair, or changes in metabolism. Mutations in this gene are associated with a variety of human cancers, includi…	chr17:7668402-7687490;chr17:7668402-7687550;chr17:7668402-7675244;chr17:7668402-7675493
b	B3	44202892	7157	H. sapiens	7157	H. sapiens	TP53	BCC7|BMFS5|LFS1|P53|TRP53	protein-coding	tumor protein p53	This gene encodes a tumor suppressor protein containing transcriptional activation, DNA binding, and oligomerization domains. The encoded protein responds to diverse cellular stresses to regulate expression of target genes, thereby inducing cell cycle arrest, apoptosis, senescence, DNA repair, or changes in metabolism. Mutations in this gene are associated with a variety of human cancers, includi…	chr17:7668402-7687490;chr17:7668402-7687550;chr17:7668402-7675244;chr17:7668402-7675493
g	G4	5280378	7157	H. sapiens	7157	H. sapiens	TP53	BCC7|BMFS5|LFS1|P53|TRP53	protein-coding	tumor protein p53	This gene encodes a tumor suppressor protein containing transcriptional activation, DNA binding, and oligomerization domains. The encoded protein responds to diverse cellular stresses to regulate expression of target genes, thereby inducing cell cycle arrest, apoptosis, senescence, DNA repair, or changes in metabolism. Mutations in this gene are associated with a variety of human cancers, includi…	chr17:7668402-7687490;chr17:7668402-7687550;chr17:7668402-7675244;chr17:7668402-7675493
g	G2	442813	7157	H. sapiens	7157	H. sapiens	TP53	BCC7|BMFS5|LFS1|P53|TRP53	protein-coding	tumor protein p53	This gene encodes a tumor suppressor protein containing transcriptional activation, DNA binding, and oligomerization domains. The encoded protein responds to diverse cellular stresses to regulate expression of target genes, thereby inducing cell cycle arrest, apoptosis, senescence, DNA repair, or changes in metabolism. Mutations in this gene are associated with a variety of human cancers, includi…	chr17:7668402-7687490;chr17:7668402-7687550;chr17:7668402-7675244;chr17:7668402-7675493
g	G2	3733033	7157	H. sapiens	7157	H. sapiens	TP53	BCC7|BMFS5|LFS1|P53|TRP53	protein-coding	tumor protein p53	This gene encodes a tumor suppressor protein containing transcriptional activation, DNA binding, and oligomerization domains. The encoded protein responds to diverse cellular stresses to regulate expression of target genes, thereby inducing cell cycle arrest, apoptosis, senescence, DNA repair, or changes in metabolism. Mutations in this gene are associated with a variety of human cancers, includi…	chr17:7668402-7687490;chr17:7668402-7687550;chr17:7668402-7675244;chr17:7668402-7675493
a	A1	7478	7172	H. sapiens	7172	H. sapiens	TPMT	TPMTD	protein-coding	thiopurine S-methyltransferase	This gene encodes the enzyme that metabolizes thiopurine drugs via S-adenosyl-L-methionine as the S-methyl donor and S-adenosyl-L-homocysteine as a byproduct. Thiopurine drugs such as 6-mercaptopurine are used as chemotherapeutic agents. Genetic polymorphisms that affect this enzymatic activity are correlated with variations in sensitivity and toxicity to such drugs within individuals, causing th…	chr6:18128314-18155169
m	M2	5281792	7276	H. sapiens	7276	H. sapiens	TTR	ATTR|CTS|CTS1|HEL111|HsT2651|PALB|TBPA	protein-coding	transthyretin	This gene encodes one of the three prealbumins, which include alpha-1-antitrypsin, transthyretin and orosomucoid. The encoded protein, transthyretin, is a homo-tetrameric carrier protein, which transports thyroid hormones in the plasma and cerebrospinal fluid. It is also involved in the transport of retinol (vitamin A) in the plasma by associating with retinol-binding protein. The protein may als…	chr18:31591877-31598821
am	AM1	5281426	7299	H. sapiens	7299	H. sapiens	TYR	ATN|CMM8|OCA1|OCA1A|OCAIA|SHEP3	protein-coding	tyrosinase	The enzyme encoded by this gene catalyzes the first 2 steps, and at least 1 subsequent step, in the conversion of tyrosine to melanin. The enzyme has both tyrosine hydroxylase and dopa oxidase catalytic activities, and requires copper for function. Mutations in this gene result in oculocutaneous albinism, and nonpathologic polymorphisms result in skin pigmentation variation. The human genome cont…	chr11:89177875-89295759
m	M2	5281792	7329	H. sapiens	7329	H. sapiens	UBE2I	C358B7.1|P18|UBC9	protein-coding	ubiquitin conjugating enzyme E2 I	The modification of proteins with ubiquitin is an important cellular mechanism for targeting abnormal or short-lived proteins for degradation. Ubiquitination involves at least three classes of enzymes: ubiquitin-activating enzymes, or E1s, ubiquitin-conjugating enzymes, or E2s, and ubiquitin-protein ligases, or E3s. This gene encodes a member of the E2 ubiquitin-conjugating enzyme family. Four al…	chr16:1309636-1327017;chr16:1309152-1327017
am	AM1	5281426	7366	H. sapiens	7366	H. sapiens	UGT2B15	HLUG4|UDPGT 2B8|UDPGT2B15|UDPGTH3|UGT2B8	protein-coding	UDP glucuronosyltransferase family 2 member B15	This gene encodes a glycosyltransferase that is invovled in the metabolism and elimination of toxic compounts, both endogenous and of xenobiotic origin. This gene plays a role in the regulation of estrogens and androgens. This locus is present in a cluster of similar genes and pseudogenes on chromosome 4. [provided by RefSeq, Aug 2016]	chr4:68646597-68670652;chr4_GL000257v2_alt:222964-247007
b	B2	44202895	7398	H. sapiens	7398	H. sapiens	USP1	UBP	protein-coding	ubiquitin specific peptidase 1	This gene encodes a member of the ubiquitin-specific processing (UBP) family of proteases that is a deubiquitinating enzyme (DUB) with His and Cys domains. This protein is located in the cytoplasm and cleaves the ubiquitin moiety from ubiquitin-fused precursors and ubiquitinylated proteins. The protein specifically deubiquitinates a protein in the Fanconi anemia (FA) DNA repair pathway. Alternate…	chr1:62436304-62451804;chr1:62437049-62451804
g	G4	5280378	7421	H. sapiens	7421	H. sapiens	VDR	NR1I1|PPP1R163	protein-coding	vitamin D receptor	This gene encodes vitamin D3 receptor, which is a member of the nuclear hormone receptor superfamily of ligand-inducible transcription factors. This receptor also functions as a receptor for the secondary bile acid, lithocholic acid. Downstream targets of vitamin D3 receptor are principally involved in mineral metabolism, though this receptor regulates a variety of other metabolic pathways, such …	chr12:47841537-47904994
g	G1	14982	7433	H. sapiens	7433	H. sapiens	VIPR1	HVR1|II|PACAP-R-2|PACAP-R2|RDC1|V1RG|VAPC1|VIP-R-1|VIPR|VIRG|VPAC1|VPAC1R|VPCAP1R	protein-coding	vasoactive intestinal peptide receptor 1	This gene encodes a receptor for vasoactive intestinal peptide, a small neuropeptide. Vasoactive intestinal peptide is involved in smooth muscle relaxation, exocrine and endocrine secretion, and water and ion flux in lung and intestinal epithelia. Its actions are effected through integral membrane receptors associated with a guanine nucleotide binding protein which activates adenylate cyclase. Se…	chr3:42502612-42537573;chr3:42489299-42537573;chr3:42502643-42537568
z	Z1	3473	7442	H. sapiens	7442	H. sapiens	TRPV1	VR1	protein-coding	transient receptor potential cation channel subfamily V member 1	Capsaicin, the main pungent ingredient in hot chili peppers, elicits a sensation of burning pain by selectively activating sensory neurons that convey information about noxious stimuli to the central nervous system. The protein encoded by this gene is a receptor for capsaicin and is a non-selective cation channel that is structurally related to members of the TRP family of ion channels. This rece…	chr17:3565446-3592877;chr17:3565446-3609411;chr17:3565446-3597042;chr17:3565446-3595831
m	M2	5281792	7458	H. sapiens	7458	H. sapiens	EIF4H	WBSCR1|WSCR1|eIF-4H	protein-coding	eukaryotic translation initiation factor 4H	This gene encodes one of the translation initiation factors, which functions to stimulate the initiation of protein synthesis at the level of mRNA utilization. This gene is deleted in Williams syndrome, a multisystem developmental disorder caused by the deletion of contiguous genes at 7q11.23. Alternative splicing of this gene generates 2 transcript variants. [provided by RefSeq, Jul 2008]	chr7:74174356-74197096
am	AM1	5281426	7498	H. sapiens	7498	H. sapiens	XDH	XAN1|XO|XOR	protein-coding	xanthine dehydrogenase	Xanthine dehydrogenase belongs to the group of molybdenum-containing hydroxylases involved in the oxidative metabolism of purines. The encoded protein has been identified as a moonlighting protein based on its ability to perform mechanistically distinct functions. Xanthine dehydrogenase can be converted to xanthine oxidase by reversible sulfhydryl oxidation or by irreversible proteolytic modifica…	chr2:31334321-31414742
m	M2	5281792	7941	H. sapiens	7941	H. sapiens	PLA2G7	LDL-PLA2|LP-PLA2|PAFAD|PAFAH	protein-coding	phospholipase A2 group VII	The protein encoded by this gene is a secreted enzyme that catalyzes the degradation of platelet-activating factor to biologically inactive products. Defects in this gene are a cause of platelet-activating factor acetylhydrolase deficiency. Two transcript variants encoding the same protein have been found for this gene.[provided by RefSeq, Dec 2009]	chr6:46704201-46735375;chr6:46704316-46735693
g	G1	14982	8654	H. sapiens	8654	H. sapiens	PDE5A	CGB-PDE|CN5A|PDE5	protein-coding	phosphodiesterase 5A	This gene encodes a cGMP-binding, cGMP-specific phosphodiesterase, a member of the cyclic nucleotide phosphodiesterase family. This phosphodiesterase specifically hydrolyzes cGMP to 5'-GMP. It is involved in the regulation of intracellular concentrations of cyclic nucleotides and is important for smooth muscle relaxation in the cardiovascular system. Alternative splicing of this gene results in t…	chr4:119494403-119628804;chr4:119494403-119627737;chr4:119494395-119628084
am	AM1	5281426	8714	H. sapiens	8714	H. sapiens	ABCC3	ABC31|EST90757|MLP2|MOAT-D|MRP3|cMOAT2	protein-coding	ATP binding cassette subfamily C member 3	The protein encoded by this gene is a member of the superfamily of ATP-binding cassette (ABC) transporters. ABC proteins transport various molecules across extra- and intra-cellular membranes. ABC genes are divided into seven distinct subfamilies (ABC1, MDR/TAP, MRP, ALD, OABP, GCN20, White). This protein is a member of the MRP subfamily which is involved in multi-drug resistance. The specific fu…	chr17:50634881-50667927;chr17:50634881-50692253
g	G4	5280378	8856	H. sapiens	8856	H. sapiens	NR1I2	BXR|ONR1|PAR|PAR1|PAR2|PARq|PRR|PXR|SAR|SXR	protein-coding	nuclear receptor subfamily 1 group I member 2	This gene product belongs to the nuclear receptor superfamily, members of which are transcription factors characterized by a ligand-binding domain and a DNA-binding domain. The encoded protein is a transcriptional regulator of the cytochrome P450 gene CYP3A4, binding to the response element of the CYP3A4 promoter as a heterodimer with the 9-cis retinoic acid receptor RXR. It is activated by a ran…	chr3:119782710-119818485;chr3:119780484-119818485
a	A3	5319022	8989	H. sapiens	8989	H. sapiens	TRPA1	ANKTM1|FEPS|FEPS1	protein-coding	transient receptor potential cation channel subfamily A member 1	The structure of the protein encoded by this gene is highly related to both the protein ankyrin and transmembrane proteins. The specific function of this protein has not yet been determined; however, studies indicate the function may involve a role in signal transduction and growth control. [provided by RefSeq, Jul 2008]	chr8:72021250-72075584
m	M2	5281792	9099	H. sapiens	9099	H. sapiens	USP2	UBP41|USP9	protein-coding	ubiquitin specific peptidase 2	This gene encodes a member of the family of de-ubiquitinating enzymes, which belongs to the peptidase C19 superfamily. The encoded protein is a ubiquitin-specific protease which is required for TNF-alpha (tumor necrosis factor alpha) -induced NF-kB (nuclear factor kB) signaling. This protein deubiquitinates polyubiquitinated target proteins such as fatty acid synthase, murine double minute 2 (MDM…	chr11:119355215-119381690;chr11:119355215-119364208
g	G2	3733033	9367	H. sapiens	9367	H. sapiens	RAB9A	RAB9	protein-coding	RAB9A, member RAS oncogene family		chrX:13689121-13709826;chrX:13689128-13710504
am	AM1	5281426	9429	H. sapiens	9429	H. sapiens	ABCG2	ABC15|ABCP|BCRP|BCRP1|BMDP|CD338|CDw338|EST157481|GOUT1|MRX|MXR|MXR-1|MXR1|UAQTL1	protein-coding	ATP binding cassette subfamily G member 2 (Junior blood group)	The membrane-associated protein encoded by this gene is included in the superfamily of ATP-binding cassette (ABC) transporters. ABC proteins transport various molecules across extra- and intra-cellular membranes. ABC genes are divided into seven distinct subfamilies (ABC1, MDR/TAP, MRP, ALD, OABP, GCN20, White). This protein is a member of the White subfamily. Alternatively referred to as a breas…	chr4:88090264-88159323;chr4:88090264-88231626;chr4:88090264-88158859;chr4:88090269-88158639
m	M2	5315615	9446	H. sapiens	9446	H. sapiens	GSTO1	GSTO 1-1|GSTTLp28|HEL-S-21|P28|SPG-R	protein-coding	glutathione S-transferase omega 1	The protein encoded by this gene is an omega class glutathione S-transferase (GST) with glutathione-dependent thiol transferase and dehydroascorbate reductase activities. GSTs are involved in the metabolism of xenobiotics and carcinogens. The encoded protein acts as a homodimer and is found in the cytoplasm. Three transcript variants encoding different isoforms have been found for this gene. [pro…	chr10:104254194-104267464;chr10:104254710-104267464;chr10:104254892-104267455
m	M3	8768	9682	H. sapiens	9682	H. sapiens	KDM4A	JHDM3A|JMJD2|JMJD2A|TDRD14A	protein-coding	lysine demethylase 4A	This gene is a member of the Jumonji domain 2 (JMJD2) family and encodes a protein containing a JmjN domain, a JmjC domain, a JD2H domain, two TUDOR domains, and two PHD-type zinc fingers. This nuclear protein functions as a trimethylation-specific demethylase, converting specific trimethylated histone residues to the dimethylated form, and as a transcriptional repressor. [provided by RefSeq, Apr…	chr1:43650149-43705518
m	M2	5315615	9682	H. sapiens	9682	H. sapiens	KDM4A	JHDM3A|JMJD2|JMJD2A|TDRD14A	protein-coding	lysine demethylase 4A	This gene is a member of the Jumonji domain 2 (JMJD2) family and encodes a protein containing a JmjN domain, a JmjC domain, a JD2H domain, two TUDOR domains, and two PHD-type zinc fingers. This nuclear protein functions as a trimethylation-specific demethylase, converting specific trimethylated histone residues to the dimethylated form, and as a transcriptional repressor. [provided by RefSeq, Apr…	chr1:43650149-43705518
b	B2	44202895	9682	H. sapiens	9682	H. sapiens	KDM4A	JHDM3A|JMJD2|JMJD2A|TDRD14A	protein-coding	lysine demethylase 4A	This gene is a member of the Jumonji domain 2 (JMJD2) family and encodes a protein containing a JmjN domain, a JmjC domain, a JD2H domain, two TUDOR domains, and two PHD-type zinc fingers. This nuclear protein functions as a trimethylation-specific demethylase, converting specific trimethylated histone residues to the dimethylated form, and as a transcriptional repressor. [provided by RefSeq, Apr…	chr1:43650149-43705518
g	G4	5280378	9734	H. sapiens	9734	H. sapiens	HDAC9	HD7|HD7b|HD9|HDAC|HDAC7|HDAC7B|HDAC9B|HDAC9FL|HDRP|MITR	protein-coding	histone deacetylase 9	Histones play a critical role in transcriptional regulation, cell cycle progression, and developmental events. Histone acetylation/deacetylation alters chromosome structure and affects transcription factor access to DNA. The protein encoded by this gene has sequence homology to members of the histone deacetylase family. This gene is orthologous to the Xenopus and mouse MITR genes. The MITR protei…	chr7:18495749-19002414;chr7:18495749-18668843;chr7:18086825-18668843;chr7:18086825-19002414;chr7:18495710-18668843;chr7:18290092-18668843;chr7:18496262-19002414;chr7:18496262-18954316;chr7:18509270-18668843;chr7:18495749-18548507
g	G4	5280378	9970	H. sapiens	9970	H. sapiens	NR1I3	CAR|CAR1|MB67	protein-coding	nuclear receptor subfamily 1 group I member 3	This gene encodes a member of the nuclear receptor superfamily, and is a key regulator of xenobiotic and endobiotic metabolism. The protein binds to DNA as a monomer or a heterodimer with the retinoid X receptor and regulates the transcription of target genes involved in drug metabolism and bilirubin clearance, such as cytochrome P450 family members. Unlike most nuclear receptors, this transcript…	chr1:161229669-161238203;chr1:161229666-161238210
am	AM2	155948	9971	H. sapiens	9971	H. sapiens	NR1H4	BAR|FXR|HRR-1|HRR1|PFIC5|RIP14	protein-coding	nuclear receptor subfamily 1 group H member 4	This gene encodes a ligand-activated transcription factor that shares structural features in common with nuclear hormone receptor family members. This protein functions as a receptor for bile acids, and when bound to bile acids, binds to DNA and regulates the expression of genes involved in bile acid synthesis and transport. Alternatively spliced transcript variants encoding different isoforms ha…	chr12:100503360-100564414;chr12:100473866-100564414
m	M2	5281792	10054	H. sapiens	10054	H. sapiens	UBA2	ARX|HRIHFB2115|SAE2	protein-coding	ubiquitin like modifier activating enzyme 2	Posttranslational modification of proteins by the addition of the small protein SUMO (see SUMO1; MIM 601912), or sumoylation, regulates protein structure and intracellular localization. SAE1 (MIM 613294) and UBA2 form a heterodimer that functions as a SUMO-activating enzyme for the sumoylation of proteins (Okuma et al., 1999 [PubMed 9920803]).[supplied by OMIM, Mar 2010]	chr19:34428381-34471251
m	M2	5281792	10055	H. sapiens	10055	H. sapiens	SAE1	AOS1|HSPC140|SUA1|UBLE1A	protein-coding	SUMO1 activating enzyme subunit 1	Posttranslational modification of proteins by the addition of the small protein SUMO (see SUMO1; MIM 601912), or sumoylation, regulates protein structure and intracellular localization. SAE1 and UBA2 (MIM 613295) form a heterodimer that functions as a SUMO-activating enzyme for the sumoylation of proteins (Okuma et al., 1999 [PubMed 9920803]).[supplied by OMIM, Mar 2010]	chr19:47130835-47210636
am	AM1	5281426	10073	H. sapiens	10073	H. sapiens	SNUPN	KPNBL|RNUT1|Snurportin1	protein-coding	snurportin 1	The nuclear import of the spliceosomal snRNPs U1, U2, U4 and U5, is dependent on the presence of a complex nuclear localization signal. The latter is composed of the 5'-2,2,7-terminal trimethylguanosine (m3G) cap structure of the U snRNA and the Sm core domain. The protein encoded by this gene interacts specifically with m3G-cap and functions as an snRNP-specific nuclear import receptor. Alternat…	chr15:75598083-75626105;chr15:75598083-75626378;chr15:75598086-75625725
g	G4	5280378	10073	H. sapiens	10073	H. sapiens	SNUPN	KPNBL|RNUT1|Snurportin1	protein-coding	snurportin 1	The nuclear import of the spliceosomal snRNPs U1, U2, U4 and U5, is dependent on the presence of a complex nuclear localization signal. The latter is composed of the 5'-2,2,7-terminal trimethylguanosine (m3G) cap structure of the U snRNA and the Sm core domain. The protein encoded by this gene interacts specifically with m3G-cap and functions as an snRNP-specific nuclear import receptor. Alternat…	chr15:75598083-75626105;chr15:75598083-75626378;chr15:75598086-75625725
m	M2	5315615	10073	H. sapiens	10073	H. sapiens	SNUPN	KPNBL|RNUT1|Snurportin1	protein-coding	snurportin 1	The nuclear import of the spliceosomal snRNPs U1, U2, U4 and U5, is dependent on the presence of a complex nuclear localization signal. The latter is composed of the 5'-2,2,7-terminal trimethylguanosine (m3G) cap structure of the U snRNA and the Sm core domain. The protein encoded by this gene interacts specifically with m3G-cap and functions as an snRNP-specific nuclear import receptor. Alternat…	chr15:75598083-75626105;chr15:75598083-75626378;chr15:75598086-75625725
am	AM1	5281426	10257	H. sapiens	10257	H. sapiens	ABCC4	MOAT-B|MOATB|MRP4	protein-coding	ATP binding cassette subfamily C member 4	The protein encoded by this gene is a member of the superfamily of ATP-binding cassette (ABC) transporters. ABC proteins transport various molecules across extra- and intra-cellular membranes. ABC genes are divided into seven distinct subfamilies (ABC1, MDR/TAP, MRP, ALD, OABP, GCN20, White). This protein is a member of the MRP subfamily which is involved in multi-drug resistance. This family mem…	chr13:95019829-95301446;chr13:95019835-95301451;chr13:95095771-95301451
g	G1	14982	10280	H. sapiens	10280	H. sapiens	SIGMAR1	ALS16|DSMA2|OPRS1|SIG-1R|SR-BP|SR-BP1|SRBP|hSigmaR1|sigma1R	protein-coding	sigma non-opioid intracellular receptor 1	This gene encodes a receptor protein that interacts with a variety of psychotomimetic drugs, including cocaine and amphetamines. The receptor is believed to play an important role in the cellular functions of various tissues associated with the endocrine, immune, and nervous systems. As indicated by its previous name, opioid receptor sigma 1 (OPRS1), the product of this gene was erroneously thoug…	chr9:34634722-34637826;chr9:34634722-34637787
m	M2	5281792	10287	H. sapiens	10287	H. sapiens	RGS19	GAIP|RGSGAIP	protein-coding	regulator of G protein signaling 19	G proteins mediate a number of cellular processes. The protein encoded by this gene belongs to the RGS (regulators of G-protein signaling) family and specifically interacts with G protein, GAI3. This protein is a guanosine triphosphatase-activating protein that functions to down-regulate Galpha i/Galpha q-linked signaling. Alternatively spliced transcript variants encoding the same protein isofor…	chr20:64073181-64079518;chr20:64073181-64079964
m	M3	8768	10287	H. sapiens	10287	H. sapiens	RGS19	GAIP|RGSGAIP	protein-coding	regulator of G protein signaling 19	G proteins mediate a number of cellular processes. The protein encoded by this gene belongs to the RGS (regulators of G-protein signaling) family and specifically interacts with G protein, GAI3. This protein is a guanosine triphosphatase-activating protein that functions to down-regulate Galpha i/Galpha q-linked signaling. Alternatively spliced transcript variants encoding the same protein isofor…	chr20:64073181-64079518;chr20:64073181-64079964
g	G4	5280378	10413	H. sapiens	10413	H. sapiens	YAP1	COB1|YAP|YAP2|YAP65|YKI	protein-coding	Yes1 associated transcriptional regulator	This gene encodes a downstream nuclear effector of the Hippo signaling pathway which is involved in development, growth, repair, and homeostasis. This gene is known to play a role in the development and progression of multiple cancers as a transcriptional regulator of this signaling pathway and may function as a potential target for cancer treatment. Alternative splicing results in multiple trans…	chr11:102110447-102233424;chr11:102110461-102233423;chr11:102112448-102233424
g	G1	14982	10599	H. sapiens	10599	H. sapiens	SLCO1B1	HBLRR|LST-1|LST1|OATP-C|OATP1B1|OATP2|OATPC|SLC21A6	protein-coding	solute carrier organic anion transporter family member 1B1	This gene encodes a liver-specific member of the organic anion transporter family. The encoded protein is a transmembrane receptor that mediates the sodium-independent uptake of numerous endogenous compounds including bilirubin, 17-beta-glucuronosyl estradiol and leukotriene C4. This protein is also involved in the removal of drug compounds such as statins, bromosulfophthalein and rifampin from t…	chr12:21131194-21239796
am	AM1	5281426	10599	H. sapiens	10599	H. sapiens	SLCO1B1	HBLRR|LST-1|LST1|OATP-C|OATP1B1|OATP2|OATPC|SLC21A6	protein-coding	solute carrier organic anion transporter family member 1B1	This gene encodes a liver-specific member of the organic anion transporter family. The encoded protein is a transmembrane receptor that mediates the sodium-independent uptake of numerous endogenous compounds including bilirubin, 17-beta-glucuronosyl estradiol and leukotriene C4. This protein is also involved in the removal of drug compounds such as statins, bromosulfophthalein and rifampin from t…	chr12:21131194-21239796
m	M2	5281792	10599	H. sapiens	10599	H. sapiens	SLCO1B1	HBLRR|LST-1|LST1|OATP-C|OATP1B1|OATP2|OATPC|SLC21A6	protein-coding	solute carrier organic anion transporter family member 1B1	This gene encodes a liver-specific member of the organic anion transporter family. The encoded protein is a transmembrane receptor that mediates the sodium-independent uptake of numerous endogenous compounds including bilirubin, 17-beta-glucuronosyl estradiol and leukotriene C4. This protein is also involved in the removal of drug compounds such as statins, bromosulfophthalein and rifampin from t…	chr12:21131194-21239796
g	G4	5280378	10599	H. sapiens	10599	H. sapiens	SLCO1B1	HBLRR|LST-1|LST1|OATP-C|OATP1B1|OATP2|OATPC|SLC21A6	protein-coding	solute carrier organic anion transporter family member 1B1	This gene encodes a liver-specific member of the organic anion transporter family. The encoded protein is a transmembrane receptor that mediates the sodium-independent uptake of numerous endogenous compounds including bilirubin, 17-beta-glucuronosyl estradiol and leukotriene C4. This protein is also involved in the removal of drug compounds such as statins, bromosulfophthalein and rifampin from t…	chr12:21131194-21239796
a	A3	5319022	10599	H. sapiens	10599	H. sapiens	SLCO1B1	HBLRR|LST-1|LST1|OATP-C|OATP1B1|OATP2|OATPC|SLC21A6	protein-coding	solute carrier organic anion transporter family member 1B1	This gene encodes a liver-specific member of the organic anion transporter family. The encoded protein is a transmembrane receptor that mediates the sodium-independent uptake of numerous endogenous compounds including bilirubin, 17-beta-glucuronosyl estradiol and leukotriene C4. This protein is also involved in the removal of drug compounds such as statins, bromosulfophthalein and rifampin from t…	chr12:21131194-21239796
g	G1	14982	10800	H. sapiens	10800	H. sapiens	CYSLTR1	CYSLT1|CYSLT1R|CYSLTR|HMTMF81	protein-coding	cysteinyl leukotriene receptor 1	This gene encodes a member of the G-protein coupled receptor 1 family. The encoded protein is a receptor for cysteinyl leukotrienes, and is involved in mediating bronchoconstriction via activation of a phosphatidylinositol-calcium second messenger system. Activation of the encoded receptor results in contraction and proliferation of bronchial smooth muscle cells, eosinophil migration, and damage …	chrX:78271472-78327611;chrX:78271472-78327691
m	M2	5281792	10919	H. sapiens	10919	H. sapiens	EHMT2	BAT8|C6orf30|G9A|GAT8|KMT1C|NG36	protein-coding	euchromatic histone lysine methyltransferase 2	This gene encodes a methyltransferase that methylates lysine residues of histone H3. Methylation of H3 at lysine 9 by this protein results in recruitment of additional epigenetic regulators and repression of transcription. This gene was initially thought to be two different genes, NG36 and G9a, adjacent to each other in the HLA locus. Alternative splicing results in multiple transcript variants. …	chr6_GL000254v2_alt:3221825-3239278;chr6_GL000252v2_alt:3127534-3144980;chr6_GL000255v2_alt:3135733-3153178;chr6_GL000251v2_alt:3357185-3375123;chr6_GL000256v2_alt:3180981-3190826;chr6:31879760-31896989;chr6_GL000252v2_alt:3127534-3145472;chr6_GL000255v2_alt:3135733-3153670;chr6:31879760-31897206;chr6_GL000250v2_alt:3212375-3229828;chr6_GL000251v2_alt:3357185-3374631;chr6_GL000250v2_alt:3212375-3…
m	M3	8768	10919	H. sapiens	10919	H. sapiens	EHMT2	BAT8|C6orf30|G9A|GAT8|KMT1C|NG36	protein-coding	euchromatic histone lysine methyltransferase 2	This gene encodes a methyltransferase that methylates lysine residues of histone H3. Methylation of H3 at lysine 9 by this protein results in recruitment of additional epigenetic regulators and repression of transcription. This gene was initially thought to be two different genes, NG36 and G9a, adjacent to each other in the HLA locus. Alternative splicing results in multiple transcript variants. …	chr6_GL000254v2_alt:3221825-3239278;chr6_GL000252v2_alt:3127534-3144980;chr6_GL000255v2_alt:3135733-3153178;chr6_GL000251v2_alt:3357185-3375123;chr6_GL000256v2_alt:3180981-3190826;chr6:31879760-31896989;chr6_GL000252v2_alt:3127534-3145472;chr6_GL000255v2_alt:3135733-3153670;chr6:31879760-31897206;chr6_GL000250v2_alt:3212375-3229828;chr6_GL000251v2_alt:3357185-3374631;chr6_GL000250v2_alt:3212375-3…
m	M2	5315615	10919	H. sapiens	10919	H. sapiens	EHMT2	BAT8|C6orf30|G9A|GAT8|KMT1C|NG36	protein-coding	euchromatic histone lysine methyltransferase 2	This gene encodes a methyltransferase that methylates lysine residues of histone H3. Methylation of H3 at lysine 9 by this protein results in recruitment of additional epigenetic regulators and repression of transcription. This gene was initially thought to be two different genes, NG36 and G9a, adjacent to each other in the HLA locus. Alternative splicing results in multiple transcript variants. …	chr6_GL000254v2_alt:3221825-3239278;chr6_GL000252v2_alt:3127534-3144980;chr6_GL000255v2_alt:3135733-3153178;chr6_GL000251v2_alt:3357185-3375123;chr6_GL000256v2_alt:3180981-3190826;chr6:31879760-31896989;chr6_GL000252v2_alt:3127534-3145472;chr6_GL000255v2_alt:3135733-3153670;chr6:31879760-31897206;chr6_GL000250v2_alt:3212375-3229828;chr6_GL000251v2_alt:3357185-3374631;chr6_GL000250v2_alt:3212375-3…
am	AM1	5281426	10941	H. sapiens	10941	H. sapiens	UGT2A1	UDPGT2A1	protein-coding	UDP glucuronosyltransferase family 2 member A1 complex locus	The protein encoded by this gene belongs to the UDP-glycosyltransferase family, members of which catalyze biotransformation reactions in which lipophilic substrates are conjugated with glucuronic acid to increase water solubility and enhance excretion. They are of major importance in the conjugation and subsequent elimination of potentially toxic xenobiotics and endogenous compounds. This enzyme …	chr4:69588417-69653247;chr4:69588417-69647698
m	M2	5315615	10951	H. sapiens	10951	H. sapiens	CBX1	CBX|HP1-BETA|HP1Hs-beta|HP1Hsbeta|M31|MOD1|p25beta	protein-coding	chromobox 1	This gene encodes a highly conserved nonhistone protein, which is a member of the heterochromatin protein family . The protein is enriched in the heterochromatin and associated with centromeres. The protein has a single N-terminal chromodomain which can bind to histone proteins via methylated lysine residues, and a C-terminal chromo shadow-domain (CSD) which is responsible for the homodimerizatio…	chr17:48070059-48101186;chr17:48070059-48101478
m	M2	5315615	11168	H. sapiens	11168	H. sapiens	PSIP1	DFS70|LEDGF|PAIP|PSIP2|p52|p75	protein-coding	PC4 and SFRS1 interacting protein 1		chr9:15464066-15510970;chr9:15470644-15510970;chr9:15470644-15510289;chr9:15464066-15511019
b	B3	44202892	11201	H. sapiens	11201	H. sapiens	POLI	RAD30B|RAD3OB|eta2	protein-coding	DNA polymerase iota	The protein encoded by this gene is an error-prone DNA polymerase involved in DNA repair. The encoded protein promotes DNA synthesis across lesions in the template DNA, which other polymerases cannot do. The encoded polymerase inserts deoxynucleotides across lesions and then relies on DNA polymerase zeta to extend the nascent DNA strand to bypass the lesion. [provided by RefSeq, May 2017]	chr18:54269574-54298234;chr18:54269479-54298234;chr18:54269479-54321266
m	M3	8768	11201	H. sapiens	11201	H. sapiens	POLI	RAD30B|RAD3OB|eta2	protein-coding	DNA polymerase iota	The protein encoded by this gene is an error-prone DNA polymerase involved in DNA repair. The encoded protein promotes DNA synthesis across lesions in the template DNA, which other polymerases cannot do. The encoded polymerase inserts deoxynucleotides across lesions and then relies on DNA polymerase zeta to extend the nascent DNA strand to bypass the lesion. [provided by RefSeq, May 2017]	chr18:54269574-54298234;chr18:54269479-54298234;chr18:54269479-54321266
m	M2	5315615	11201	H. sapiens	11201	H. sapiens	POLI	RAD30B|RAD3OB|eta2	protein-coding	DNA polymerase iota	The protein encoded by this gene is an error-prone DNA polymerase involved in DNA repair. The encoded protein promotes DNA synthesis across lesions in the template DNA, which other polymerases cannot do. The encoded polymerase inserts deoxynucleotides across lesions and then relies on DNA polymerase zeta to extend the nascent DNA strand to bypass the lesion. [provided by RefSeq, May 2017]	chr18:54269574-54298234;chr18:54269479-54298234;chr18:54269479-54321266
g	G2	442813	11201	H. sapiens	11201	H. sapiens	POLI	RAD30B|RAD3OB|eta2	protein-coding	DNA polymerase iota	The protein encoded by this gene is an error-prone DNA polymerase involved in DNA repair. The encoded protein promotes DNA synthesis across lesions in the template DNA, which other polymerases cannot do. The encoded polymerase inserts deoxynucleotides across lesions and then relies on DNA polymerase zeta to extend the nascent DNA strand to bypass the lesion. [provided by RefSeq, May 2017]	chr18:54269574-54298234;chr18:54269479-54298234;chr18:54269479-54321266
g	G1	14982	11309	H. sapiens	11309	H. sapiens	SLCO2B1	OATP-B|OATP2B1|OATPB|SLC21A9	protein-coding	solute carrier organic anion transporter family member 2B1	This locus encodes a member of the organic anion-transporting polypeptide family of membrane proteins. The protein encoded by this locus may function in regulation of placental uptake of sulfated steroids. Alternatively spliced transcript variants have been described. [provided by RefSeq, Nov 2010]	chr11:75151107-75206549;chr11:75159832-75206549
g	G4	5280378	11651	M. musculus	207	H. sapiens	AKT1	AKT|CWS6|PKB|PKB-ALPHA|PRKBA|RAC|RAC-ALPHA	protein-coding	AKT serine/threonine kinase 1	The serine-threonine protein kinase encoded by the AKT1 gene is catalytically inactive in serum-starved primary and immortalized fibroblasts. AKT1 and the related AKT2 are activated by platelet-derived growth factor. The activation is rapid and specific, and it is abrogated by mutations in the pleckstrin homology domain of AKT1. It was shown that the activation occurs through phosphatidylinositol…	chr14:104769350-104793601;chr14:104769350-104795743;chr14:104769350-104795748
am	AM1	5281426	12972	M. musculus	1429	H. sapiens	CRYZ		protein-coding	crystallin zeta	Crystallins are separated into two classes: taxon-specific, or enzyme, and ubiquitous. The latter class constitutes the major proteins of vertebrate eye lens and maintains the transparency and refractive index of the lens. The former class is also called phylogenetically-restricted crystallins. This gene encodes a taxon-specific crystallin protein which has NADPH-dependent quinone reductase activ…	chr1:74705488-74733050;chr1:74705488-74733408
g	G1	14982	15483	M. musculus	3290	H. sapiens	HSD11B1	11-DH|11-beta-HSD1|CORTRD2|HDL|HSD11|HSD11B|HSD11L|SDR26C1	protein-coding	hydroxysteroid 11-beta dehydrogenase 1	The protein encoded by this gene is a microsomal enzyme that catalyzes the conversion of the stress hormone cortisol to the inactive metabolite cortisone. In addition, the encoded protein can catalyze the reverse reaction, the conversion of cortisone to cortisol. Too much cortisol can lead to central obesity, and a particular variation in this gene has been associated with obesity and insulin res…	chr1:209686180-209734950;chr1:209704846-209734928
g	G1	14982	18126	M. musculus	4843	H. sapiens	NOS2	HEP-NOS|INOS|NOS|NOS2A	protein-coding	nitric oxide synthase 2	Nitric oxide is a reactive free radical which acts as a biologic mediator in several processes, including neurotransmission and antimicrobial and antitumoral activities. This gene encodes a nitric oxide synthase which is expressed in liver and is inducible by a combination of lipopolysaccharide and certain cytokines. Three related pseudogenes are located within the Smith-Magenis syndrome region o…	chr17:27756766-27800529
m	M3	8768	18792	M. musculus	5328	H. sapiens	PLAU	ATF|BDPLT5|QPD|UPA|URK|u-PA	protein-coding	plasminogen activator, urokinase	This gene encodes a secreted serine protease that converts plasminogen to plasmin. The encoded preproprotein is proteolytically processed to generate A and B polypeptide chains. These chains associate via a single disulfide bond to form the catalytically inactive high molecular weight urokinase-type plasminogen activator (HMW-uPA). HMW-uPA can be further processed into the catalytically active lo…	chr10:73911132-73917494
g	G4	5280378	18792	M. musculus	5328	H. sapiens	PLAU	ATF|BDPLT5|QPD|UPA|URK|u-PA	protein-coding	plasminogen activator, urokinase	This gene encodes a secreted serine protease that converts plasminogen to plasmin. The encoded preproprotein is proteolytically processed to generate A and B polypeptide chains. These chains associate via a single disulfide bond to form the catalytically inactive high molecular weight urokinase-type plasminogen activator (HMW-uPA). HMW-uPA can be further processed into the catalytically active lo…	chr10:73911132-73917494
g	G2	442813	18792	M. musculus	5328	H. sapiens	PLAU	ATF|BDPLT5|QPD|UPA|URK|u-PA	protein-coding	plasminogen activator, urokinase	This gene encodes a secreted serine protease that converts plasminogen to plasmin. The encoded preproprotein is proteolytically processed to generate A and B polypeptide chains. These chains associate via a single disulfide bond to form the catalytically inactive high molecular weight urokinase-type plasminogen activator (HMW-uPA). HMW-uPA can be further processed into the catalytically active lo…	chr10:73911132-73917494
g	G2	3733033	18792	M. musculus	5328	H. sapiens	PLAU	ATF|BDPLT5|QPD|UPA|URK|u-PA	protein-coding	plasminogen activator, urokinase	This gene encodes a secreted serine protease that converts plasminogen to plasmin. The encoded preproprotein is proteolytically processed to generate A and B polypeptide chains. These chains associate via a single disulfide bond to form the catalytically inactive high molecular weight urokinase-type plasminogen activator (HMW-uPA). HMW-uPA can be further processed into the catalytically active lo…	chr10:73911132-73917494
m	M3	8768	18793	M. musculus	5329	H. sapiens	PLAUR	CD87|U-PAR|UPAR|URKR	protein-coding	plasminogen activator, urokinase receptor	This gene encodes the receptor for urokinase plasminogen activator and, given its role in localizing and promoting plasmin formation, likely influences many normal and pathological processes related to cell-surface plasminogen activation and localized degradation of the extracellular matrix. It binds both the proprotein and mature forms of urokinase plasminogen activator and permits the activatio…	chr19:43648579-43670169;chr19:43646095-43670346
g	G4	5280378	18793	M. musculus	5329	H. sapiens	PLAUR	CD87|U-PAR|UPAR|URKR	protein-coding	plasminogen activator, urokinase receptor	This gene encodes the receptor for urokinase plasminogen activator and, given its role in localizing and promoting plasmin formation, likely influences many normal and pathological processes related to cell-surface plasminogen activation and localized degradation of the extracellular matrix. It binds both the proprotein and mature forms of urokinase plasminogen activator and permits the activatio…	chr19:43648579-43670169;chr19:43646095-43670346
g	G2	442813	18793	M. musculus	5329	H. sapiens	PLAUR	CD87|U-PAR|UPAR|URKR	protein-coding	plasminogen activator, urokinase receptor	This gene encodes the receptor for urokinase plasminogen activator and, given its role in localizing and promoting plasmin formation, likely influences many normal and pathological processes related to cell-surface plasminogen activation and localized degradation of the extracellular matrix. It binds both the proprotein and mature forms of urokinase plasminogen activator and permits the activatio…	chr19:43648579-43670169;chr19:43646095-43670346
g	G2	3733033	18793	M. musculus	5329	H. sapiens	PLAUR	CD87|U-PAR|UPAR|URKR	protein-coding	plasminogen activator, urokinase receptor	This gene encodes the receptor for urokinase plasminogen activator and, given its role in localizing and promoting plasmin formation, likely influences many normal and pathological processes related to cell-surface plasminogen activation and localized degradation of the extracellular matrix. It binds both the proprotein and mature forms of urokinase plasminogen activator and permits the activatio…	chr19:43648579-43670169;chr19:43646095-43670346
m	M3	8768	18815	M. musculus	5340	H. sapiens	PLG		protein-coding	plasminogen	The protein encoded by this gene is a secreted blood zymogen that is activated by proteolysis and converted to plasmin and angiostatin. Plasmin dissolves fibrin in blood clots and is an important protease in many other cellular processes while angiostatin inhibits angiogenesis. Defects in this gene are likely a cause of thrombophilia and ligneous conjunctivitis. Two transcript variants encoding d…	chr6:160702193-160711872;chr6:160702242-160754053
g	G4	5280378	18815	M. musculus	5340	H. sapiens	PLG		protein-coding	plasminogen	The protein encoded by this gene is a secreted blood zymogen that is activated by proteolysis and converted to plasmin and angiostatin. Plasmin dissolves fibrin in blood clots and is an important protease in many other cellular processes while angiostatin inhibits angiogenesis. Defects in this gene are likely a cause of thrombophilia and ligneous conjunctivitis. Two transcript variants encoding d…	chr6:160702193-160711872;chr6:160702242-160754053
g	G2	442813	18815	M. musculus	5340	H. sapiens	PLG		protein-coding	plasminogen	The protein encoded by this gene is a secreted blood zymogen that is activated by proteolysis and converted to plasmin and angiostatin. Plasmin dissolves fibrin in blood clots and is an important protease in many other cellular processes while angiostatin inhibits angiogenesis. Defects in this gene are likely a cause of thrombophilia and ligneous conjunctivitis. Two transcript variants encoding d…	chr6:160702193-160711872;chr6:160702242-160754053
g	G2	3733033	18815	M. musculus	5340	H. sapiens	PLG		protein-coding	plasminogen	The protein encoded by this gene is a secreted blood zymogen that is activated by proteolysis and converted to plasmin and angiostatin. Plasmin dissolves fibrin in blood clots and is an important protease in many other cellular processes while angiostatin inhibits angiogenesis. Defects in this gene are likely a cause of thrombophilia and ligneous conjunctivitis. Two transcript variants encoding d…	chr6:160702193-160711872;chr6:160702242-160754053
g	G4	5280378	19013	M. musculus	5465	H. sapiens	PPARA	NR1C1|PPAR|PPARalpha|hPPAR	protein-coding	peroxisome proliferator activated receptor alpha	Peroxisome proliferators include hypolipidemic drugs, herbicides, leukotriene antagonists, and plasticizers; this term arises because they induce an increase in the size and number of peroxisomes. Peroxisomes are subcellular organelles found in plants and animals that contain enzymes for respiration and for cholesterol and lipid metabolism. The action of peroxisome proliferators is thought to be …	chr22:46150795-46243756;chr22:46150534-46243756;chr22:46150526-46243755
g	G4	5280378	19094	M. musculus	5600	H. sapiens	MAPK11	P38B|P38BETA2|PRKM11|SAPK2|SAPK2B|p38-2|p38Beta	protein-coding	mitogen-activated protein kinase 11	This gene encodes a member of a family of protein kinases that are involved in the integration of biochemical signals for a wide variety of cellular processes, including cell proliferation, differentiation, transcriptional regulation, and development. The encoded protein can be activated by proinflammatory cytokines and environmental stresses through phosphorylation by mitogen activated protein k…	chr22:50263713-50270380
g	G4	5280378	19697	M. musculus	5970	H. sapiens	RELA	CMCU|NFKB3|p65	protein-coding	RELA proto-oncogene, NF-kB subunit	NF-kappa-B is a ubiquitous transcription factor involved in several biological processes. It is held in the cytoplasm in an inactive state by specific inhibitors. Upon degradation of the inhibitor, NF-kappa-B moves to the nucleus and activates transcription of specific genes. NF-kappa-B is composed of NFKB1 or NFKB2 bound to either REL, RELA, or RELB. The most abundant form of NF-kappa-B is NFKB1…	chr11:65653601-65662916;chr11:65653596-65662972
g	G4	5280378	19885	M. musculus	6097	H. sapiens	RORC	IMD42|NR1F3|RORG|RZR-GAMMA|RZRG|TOR	protein-coding	RAR related orphan receptor C	The protein encoded by this gene is a DNA-binding transcription factor and is a member of the NR1 subfamily of nuclear hormone receptors. The specific functions of this protein are not known; however, studies of a similar gene in mice have shown that this gene may be essential for lymphoid organogenesis and may play an important regulatory role in thymopoiesis. In addition, studies in mice sugges…	chr1:151806071-151826096;chr1:151806071-151831802
g	G2	442813	20586	M. musculus	6597	H. sapiens	SMARCA4	BAF190|BAF190A|BRG1|CSS4|MRD16|RTPS2|SNF2|SNF2-beta|SNF2L4|SNF2LB|SWI2|hSNF2b	protein-coding	SWI/SNF related, matrix associated, actin dependent regulator of chromatin, subfamily a, member 4	The protein encoded by this gene is a member of the SWI/SNF family of proteins and is similar to the brahma protein of Drosophila. Members of this family have helicase and ATPase activities and are thought to regulate transcription of certain genes by altering the chromatin structure around those genes. The encoded protein is part of the large ATP-dependent chromatin remodeling complex SNF/SWI, w…	chr19:10961030-11062271;chr19:10984124-11062271
g	G4	5280378	21943	M. musculus	8600	H. sapiens	TNFSF11	CD254|ODF|OPGL|OPTB2|RANKL|TNLG6B|TRANCE|hRANKL2|sOdf	protein-coding	TNF superfamily member 11	This gene encodes a member of the tumor necrosis factor (TNF) cytokine family which is a ligand for osteoprotegerin and functions as a key factor for osteoclast differentiation and activation. This protein was shown to be a dentritic cell survival factor and is involved in the regulation of T cell-dependent immune response. T cell activation was reported to induce expression of this gene and lead…	chr13:42574152-42608013;chr13:42562736-42608013
am	AM1	5281426	23621	H. sapiens	23621	H. sapiens	BACE1	ASP2|BACE|HSPC104	protein-coding	beta-secretase 1	This gene encodes a member of the peptidase A1 family of aspartic proteases. Alternative splicing results in multiple transcript variants, at least one of which encodes a preproprotein that is proteolytically processed to generate the mature protease. This transmembrane protease catalyzes the first step in the formation of amyloid beta peptide from amyloid precursor protein. Amyloid beta peptides…	chr11:117285207-117295573;chr11:117285686-117316256
g	G1	14982	24173	R. norvegicus	147	H. sapiens	ADRA1B	ADRA1|ALPHA1BAR	protein-coding	adrenoceptor alpha 1B	Alpha-1-adrenergic receptors (alpha-1-ARs) are members of the G protein-coupled receptor superfamily. They activate mitogenic responses and regulate growth and proliferation of many cells. There are 3 alpha-1-AR subtypes: alpha-1A, -1B and -1D, all of which signal through the Gq/11 family of G-proteins and different subtypes show different patterns of activation. This gene encodes alpha-1B-adrene…	chr5:159916482-159973012
g	G1	14982	24192	R. norvegicus	231	H. sapiens	AKR1B1	ADR|ALDR1|ALR2|AR	protein-coding	aldo-keto reductase family 1 member B	This gene encodes a member of the aldo/keto reductase superfamily, which consists of more than 40 known enzymes and proteins. This member catalyzes the reduction of a number of aldehydes, including the aldehyde form of glucose, and is thereby implicated in the development of diabetic complications by catalyzing the reduction of glucose to sorbitol. Multiple pseudogenes have been identified for th…	chr7:134442350-134459192;chr7:134442350-134459239;chr7:134442356-134459100
m	M2	5281792	24192	R. norvegicus	231	H. sapiens	AKR1B1	ADR|ALDR1|ALR2|AR	protein-coding	aldo-keto reductase family 1 member B	This gene encodes a member of the aldo/keto reductase superfamily, which consists of more than 40 known enzymes and proteins. This member catalyzes the reduction of a number of aldehydes, including the aldehyde form of glucose, and is thereby implicated in the development of diabetic complications by catalyzing the reduction of glucose to sorbitol. Multiple pseudogenes have been identified for th…	chr7:134442350-134459192;chr7:134442350-134459239;chr7:134442356-134459100
p	P1	46882883	24192	R. norvegicus	231	H. sapiens	AKR1B1	ADR|ALDR1|ALR2|AR	protein-coding	aldo-keto reductase family 1 member B	This gene encodes a member of the aldo/keto reductase superfamily, which consists of more than 40 known enzymes and proteins. This member catalyzes the reduction of a number of aldehydes, including the aldehyde form of glucose, and is thereby implicated in the development of diabetic complications by catalyzing the reduction of glucose to sorbitol. Multiple pseudogenes have been identified for th…	chr7:134442350-134459192;chr7:134442350-134459239;chr7:134442356-134459100
g	G1	14982	24208	R. norvegicus	367	H. sapiens	AR	AIS|AR8|DHTR|HUMARA|HYSP1|KD|NR3C4|SBMA|SMAX1|TFM	protein-coding	androgen receptor	The androgen receptor gene is more than 90 kb long and codes for a protein that has 3 major functional domains: the N-terminal domain, DNA-binding domain, and androgen-binding domain. The protein functions as a steroid-hormone activated transcription factor. Upon binding the hormone ligand, the receptor dissociates from accessory proteins, translocates into the nucleus, dimerizes, and then stimul…	chrX:67544021-67730619;chrX:67544623-67730619;chrX:67544623-67696075;chrX:67544623-67689758
g	G1	14982	24397	R. norvegicus	2742	H. sapiens	GLRA2	GLR	protein-coding	glycine receptor alpha 2	The glycine receptor consists of two subunits, alpha and beta, and acts as a pentamer. The protein encoded by this gene is an alpha subunit and can bind strychnine. Several transcript variants encoding different isoforms have been found for this gene.[provided by RefSeq, Jan 2010]	chrX:14529536-14731811;chrX:14529298-14731811
g	G3	5282073	24434	R. norvegicus	2990	H. sapiens	GUSB	BG|MPS7	protein-coding	glucuronidase beta	This gene encodes a hydrolase that degrades glycosaminoglycans, including heparan sulfate, dermatan sulfate, and chondroitin-4,6-sulfate. The enzyme forms a homotetramer that is localized to the lysosome. Mutations in this gene result in mucopolysaccharidosis type VII. Alternative splicing results in multiple transcript variants. There are many pseudogenes of this locus in the human genome.[provi…	chr7:65960686-65982213
g	G1	14982	24473	R. norvegicus	3350	H. sapiens	HTR1A	5-HT-1A|5-HT1A|5HT1a|ADRB2RL1|ADRBRL1|G-21|PFMCD	protein-coding	5-hydroxytryptamine receptor 1A	This gene encodes a G protein-coupled receptor for 5-hydroxytryptamine (serotonin), and belongs to the 5-hydroxytryptamine receptor subfamily. Serotonin has been implicated in a number of physiologic processes and pathologic conditions. Inactivation of this gene in mice results in behavior consistent with an increased anxiety and stress response. Mutation in the promoter of this gene has been ass…	chr5:63957876-63962445
g	G1	14982	24598	R. norvegicus	4842	H. sapiens	NOS1	IHPS1|N-NOS|NC-NOS|NOS|bNOS|nNOS	protein-coding	nitric oxide synthase 1	The protein encoded by this gene belongs to the family of nitric oxide synthases, which synthesize nitric oxide from L-arginine. Nitric oxide is a reactive free radical, which acts as a biologic mediator in several processes, including neurotransmission, and antimicrobial and antitumoral activities. In the brain and peripheral nervous system, nitric oxide displays many properties of a neurotransm…	chr12:117208142-117305052;chr12:117208142-117361802;chr12:117208142-117361626;chr12:117208142-117309410
g	G1	14982	24831	R. norvegicus	7068	H. sapiens	THRB	C-ERBA-2|C-ERBA-BETA|ERBA2|GRTH|NR1A2|PRTH|THR1|THRB1|THRB2	protein-coding	thyroid hormone receptor beta	The protein encoded by this gene is a nuclear hormone receptor for triiodothyronine. It is one of the several receptors for thyroid hormone, and has been shown to mediate the biological activities of thyroid hormone. Knockout studies in mice suggest that the different receptors, while having certain extent of redundancy, may mediate different functions of thyroid hormone. Mutations in this gene a…	chr3:24117154-24494850;chr3:24117154-24495708
g	G1	14982	24954	R. norvegicus	3643	H. sapiens	INSR	CD220|HHF5	protein-coding	insulin receptor	This gene encodes a member of the receptor tyrosine kinase family of proteins. The encoded preproprotein is proteolytically processed to generate alpha and beta subunits that form a heterotetrameric receptor. Binding of insulin or other ligands to this receptor activates the insulin signaling pathway, which regulates glucose uptake and release, as well as the synthesis and storage of carbohydrate…	chr19:7112265-7294414
g	G1	14982	25075	R. norvegicus	3351	H. sapiens	HTR1B	5-HT-1B|5-HT-1D-beta|5-HT1B|5-HT1DB|HTR1D2|HTR1DB|S12	protein-coding	5-hydroxytryptamine receptor 1B	The protein encoded by this intronless gene is a G-protein coupled receptor for serotonin (5-hydroxytryptamine). Ligand binding activates second messengers that inhibit the activity of adenylate cyclase and manage the release of serotonin, dopamine, and acetylcholine in the brain. The encoded protein may be involved in several neuropsychiatric disorders and therefore is often a target of antidepr…	chr6:77460924-77463491
g	G3	5282073	25211	R. norvegicus	4069	H. sapiens	LYZ	LYZF1|LZM	protein-coding	lysozyme	This gene encodes human lysozyme, whose natural substrate is the bacterial cell wall peptidoglycan (cleaving the beta[1-4]glycosidic linkages between N-acetylmuramic acid and N-acetylglucosamine). Lysozyme is one of the antimicrobial agents found in human milk, and is also present in spleen, lung, kidney, white blood cells, plasma, saliva, and tears. The protein has antibacterial activity against…	chr12:69348381-69354234
g	G1	14982	25303	R. norvegicus	1244	H. sapiens	ABCC2	ABC30|CMOAT|DJS|MRP2|cMRP	protein-coding	ATP binding cassette subfamily C member 2	The protein encoded by this gene is a member of the superfamily of ATP-binding cassette (ABC) transporters. ABC proteins transport various molecules across extra- and intra-cellular membranes. ABC genes are divided into seven distinct subfamilies (ABC1, MDR/TAP, MRP, ALD, OABP, GCN20, White). This protein is a member of the MRP subfamily which is involved in multi-drug resistance. This protein is…	chr10:99782640-99852594
g	G1	14982	25456	R. norvegicus	2743	H. sapiens	GLRB	HKPX2	protein-coding	glycine receptor beta	This gene encodes the beta subunit of the glycine receptor, which is a pentamer composed of alpha and beta subunits. The receptor functions as a neurotransmitter-gated ion channel, which produces hyperpolarization via increased chloride conductance due to the binding of glycine to the receptor. Mutations in this gene cause startle disease, also known as hereditary hyperekplexia or congenital stif…	chr4:157076125-157172090;chr4:157076403-157172090;chr4:157076150-157172090
g	G1	14982	25674	R. norvegicus	2741	H. sapiens	GLRA1	HKPX1|STHE	protein-coding	glycine receptor alpha 1	The protein encoded by this gene is a subunit of a pentameric inhibitory glycine receptor, which mediates postsynaptic inhibition in the central nervous system. Defects in this gene are a cause of startle disease (STHE), also known as hereditary hyperekplexia or congenital stiff-person syndrome. Multiple transcript variants encoding different isoforms have been found. [provided by RefSeq, Dec 201…	chr5:151822513-151924851
g	G3	5282073	25797	H. sapiens	25797	H. sapiens	QPCT	GCT|QC|sQC	protein-coding	glutaminyl-peptide cyclotransferase	This gene encodes human pituitary glutaminyl cyclase, which is responsible for the presence of pyroglutamyl residues in many neuroendocrine peptides. The amino acid sequence of this enzyme is 86% identical to that of bovine glutaminyl cyclase. [provided by RefSeq, Jul 2008]	chr2:37344630-37373322
g	G4	5280378	26415	M. musculus	5603	H. sapiens	MAPK13	MAPK 13|MAPK-13|PRKM13|SAPK4|p38delta	protein-coding	mitogen-activated protein kinase 13	This gene encodes a member of the mitogen-activated protein (MAP) kinase family. MAP kinases act as an integration point for multiple biochemical signals, and are involved in a wide variety of cellular processes such as proliferation, differentiation, transcription regulation and development. The encoded protein is a p38 MAP kinase and is activated by proinflammatory cytokines and cellular stress…	chr6:36130513-36144521
g	G4	5280378	26416	M. musculus	1432	H. sapiens	MAPK14	CSBP|CSBP1|CSBP2|CSPB1|EXIP|Mxi2|PRKM14|PRKM15|RK|SAPK2A|p38|p38ALPHA	protein-coding	mitogen-activated protein kinase 14	The protein encoded by this gene is a member of the MAP kinase family. MAP kinases act as an integration point for multiple biochemical signals, and are involved in a wide variety of cellular processes such as proliferation, differentiation, transcription regulation and development. This kinase is activated by various environmental stresses and proinflammatory cytokines. The activation requires i…	chr6:36027677-36111236;chr6:36027808-36102764
m	M2	5281792	26986	H. sapiens	26986	H. sapiens	PABPC1	PAB1|PABP|PABP1|PABPC2|PABPL1	protein-coding	poly(A) binding protein cytoplasmic 1	This gene encodes a poly(A) binding protein. The protein shuttles between the nucleus and cytoplasm and binds to the 3' poly(A) tail of eukaryotic messenger RNAs via RNA-recognition motifs. The binding of this protein to poly(A) promotes ribosome recruitment and translation initiation; it is also required for poly(A) shortening which is the first step in mRNA decay. The gene is part of a small ge…	chr8:100702916-100722088
g	G1	14982	28234	H. sapiens	28234	H. sapiens	SLCO1B3	HBLRR|LST-2|LST-3TM13|LST3|OATP-8|OATP1B3|OATP8|SLC21A8	protein-coding	solute carrier organic anion transporter family member 1B3	This gene encodes a liver-specific member of the organic anion transporter family. The encoded protein is a transmembrane receptor that mediates the sodium-independent uptake of endogenous and xenobiotic compounds and plays a critical role in bile acid and bilirubin transport. Mutations in this gene are a cause of Rotor type hyperbilirubinemia. Alternative splicing of this gene and the use of alt…	chr12:20810705-20916909;chr12:20822548-20916909
am	AM1	5281426	28234	H. sapiens	28234	H. sapiens	SLCO1B3	HBLRR|LST-2|LST-3TM13|LST3|OATP-8|OATP1B3|OATP8|SLC21A8	protein-coding	solute carrier organic anion transporter family member 1B3	This gene encodes a liver-specific member of the organic anion transporter family. The encoded protein is a transmembrane receptor that mediates the sodium-independent uptake of endogenous and xenobiotic compounds and plays a critical role in bile acid and bilirubin transport. Mutations in this gene are a cause of Rotor type hyperbilirubinemia. Alternative splicing of this gene and the use of alt…	chr12:20810705-20916909;chr12:20822548-20916909
m	M2	5281792	28234	H. sapiens	28234	H. sapiens	SLCO1B3	HBLRR|LST-2|LST-3TM13|LST3|OATP-8|OATP1B3|OATP8|SLC21A8	protein-coding	solute carrier organic anion transporter family member 1B3	This gene encodes a liver-specific member of the organic anion transporter family. The encoded protein is a transmembrane receptor that mediates the sodium-independent uptake of endogenous and xenobiotic compounds and plays a critical role in bile acid and bilirubin transport. Mutations in this gene are a cause of Rotor type hyperbilirubinemia. Alternative splicing of this gene and the use of alt…	chr12:20810705-20916909;chr12:20822548-20916909
g	G4	5280378	28234	H. sapiens	28234	H. sapiens	SLCO1B3	HBLRR|LST-2|LST-3TM13|LST3|OATP-8|OATP1B3|OATP8|SLC21A8	protein-coding	solute carrier organic anion transporter family member 1B3	This gene encodes a liver-specific member of the organic anion transporter family. The encoded protein is a transmembrane receptor that mediates the sodium-independent uptake of endogenous and xenobiotic compounds and plays a critical role in bile acid and bilirubin transport. Mutations in this gene are a cause of Rotor type hyperbilirubinemia. Alternative splicing of this gene and the use of alt…	chr12:20810705-20916909;chr12:20822548-20916909
a	A3	5319022	28234	H. sapiens	28234	H. sapiens	SLCO1B3	HBLRR|LST-2|LST-3TM13|LST3|OATP-8|OATP1B3|OATP8|SLC21A8	protein-coding	solute carrier organic anion transporter family member 1B3	This gene encodes a liver-specific member of the organic anion transporter family. The encoded protein is a transmembrane receptor that mediates the sodium-independent uptake of endogenous and xenobiotic compounds and plays a critical role in bile acid and bilirubin transport. Mutations in this gene are a cause of Rotor type hyperbilirubinemia. Alternative splicing of this gene and the use of alt…	chr12:20810705-20916909;chr12:20822548-20916909
m	M2	5315615	29127	H. sapiens	29127	H. sapiens	RACGAP1	CYK4|HsCYK-4|ID-GAP|MgcRacGAP	protein-coding	Rac GTPase activating protein 1	This gene encodes a GTPase-activating protein (GAP) that is a compoment of the centralspindlin complex. This protein binds activated forms of Rho GTPases and stimulates GTP hydrolysis, which results in negative regulation of Rho-mediated signals. This protein plays a regulatory role in cytokinesis, cell growth, and differentiation. Alternatively spliced transcript variants have been found for thi…	chr12:49989162-50025557;chr12:49989162-50025494
g	G1	14982	29412	R. norvegicus	148	H. sapiens	ADRA1A	ADRA1C|ADRA1L1|ALPHA1AAR	protein-coding	adrenoceptor alpha 1A	Alpha-1-adrenergic receptors (alpha-1-ARs) are members of the G protein-coupled receptor superfamily. They activate mitogenic responses and regulate growth and proliferation of many cells. There are 3 alpha-1-AR subtypes: alpha-1A, -1B and -1D, all of which signal through the Gq/11 family of G-proteins and different subtypes show different patterns of activation. This gene encodes alpha-1A-adrene…	chr8:26753815-26865655;chr8:26779053-26865655;chr8:26748150-26865655;chr8:26768809-26867278;chr8:26765854-26865655
g	G4	5280378	29857	M. musculus	6300	H. sapiens	MAPK12	ERK-6|ERK3|ERK6|MAPK 12|P38GAMMA|PRKM12|SAPK-3|SAPK3	protein-coding	mitogen-activated protein kinase 12	Activation of members of the mitogen-activated protein kinase family is a major mechanism for transduction of extracellular signals. Stress-activated protein kinases are one subclass of MAP kinases. The protein encoded by this gene functions as a signal transducer during differentiation of myoblasts to myotubes. [provided by RefSeq, Jul 2008]	chr22:50252901-50261683;chr22:50252901-50261810
m	M2	5281792	29994	H. sapiens	29994	H. sapiens	BAZ2B	WALp4	protein-coding	bromodomain adjacent to zinc finger domain 2B	This gene belongs to the bromodomain gene family. Members of this gene family encode proteins that are integral components of chromatin remodeling complexes. The encoded protein showed strong preference for the activating H3K14Ac mark in a histone peptide screen, suggesting a potential role in transcriptional activation. This gene may be associated with susceptibility to sudden cardiac death (SCD…	chr2:159318979-159616601;chr2:159318979-159616548;chr2:159693196-159712442;chr2:159318979-159615565
m	M3	8768	29994	H. sapiens	29994	H. sapiens	BAZ2B	WALp4	protein-coding	bromodomain adjacent to zinc finger domain 2B	This gene belongs to the bromodomain gene family. Members of this gene family encode proteins that are integral components of chromatin remodeling complexes. The encoded protein showed strong preference for the activating H3K14Ac mark in a histone peptide screen, suggesting a potential role in transcriptional activation. This gene may be associated with susceptibility to sudden cardiac death (SCD…	chr2:159318979-159616601;chr2:159318979-159616548;chr2:159693196-159712442;chr2:159318979-159615565
m	M2	5315615	29994	H. sapiens	29994	H. sapiens	BAZ2B	WALp4	protein-coding	bromodomain adjacent to zinc finger domain 2B	This gene belongs to the bromodomain gene family. Members of this gene family encode proteins that are integral components of chromatin remodeling complexes. The encoded protein showed strong preference for the activating H3K14Ac mark in a histone peptide screen, suggesting a potential role in transcriptional activation. This gene may be associated with susceptibility to sudden cardiac death (SCD…	chr2:159318979-159616601;chr2:159318979-159616548;chr2:159693196-159712442;chr2:159318979-159615565
b	B3	44202892	51053	H. sapiens	51053	H. sapiens	GMNN	Gem|MGORS6	protein-coding	geminin DNA replication inhibitor	This gene encodes a protein that plays a critical role in cell cycle regulation. The encoded protein inhibits DNA replication by binding to DNA replication factor Cdt1, preventing the incorporation of minichromosome maintenance proteins into the pre-replication complex. The encoded protein is expressed during the S and G2 phases of the cell cycle and is degraded by the anaphase-promoting complex …	chr6:24774937-24786097;chr6:24775413-24786097
m	M2	5315615	51426	H. sapiens	51426	H. sapiens	POLK	DINB1|DINP|POLQ	protein-coding	DNA polymerase kappa	This gene encodes a member of the DNA polymerase type-Y family of proteins. The encoded protein is a specialized DNA polymerase that catalyzes translesion DNA synthesis, which allows DNA replication in the presence of DNA lesions. Human cell lines lacking a functional copy of this gene exhibit impaired genome integrity and enhanced susceptibility to oxidative damage. Mutations in this gene that i…	chr5:75511750-75605819
am	AM1	5281426	51752	H. sapiens	51752	H. sapiens	ERAP1	A-LAP|ALAP|APPILS|ARTS-1|ARTS1|ERAAP|ERAAP1|PILS-AP|PILSAP	protein-coding	endoplasmic reticulum aminopeptidase 1	The protein encoded by this gene is an aminopeptidase involved in trimming HLA class I-binding precursors so that they can be presented on MHC class I molecules. The encoded protein acts as a monomer or as a heterodimer with ERAP2. This protein may also be involved in blood pressure regulation by inactivation of angiotensin II. Three transcript variants encoding two different isoforms have been f…	chr5:96760810-96808189;chr5:96774484-96814145;chr5:96774484-96807945
am	AM1	5281426	54575	H. sapiens	54575	H. sapiens	UGT1A10	GNT1|UDPGT|UGT-1A|UGT-1J|UGT1|UGT1-01|UGT1-10|UGT1.1|UGT1.10|UGT1A|UGT1A1|UGT1J|hUG-BR1	protein-coding	UDP glucuronosyltransferase family 1 member A10	This gene encodes a UDP-glucuronosyltransferase, an enzyme of the glucuronidation pathway that transforms small lipophilic molecules, such as steroids, bilirubin, hormones, and drugs, into water-soluble, excretable metabolites. This gene is part of a complex locus that encodes several UDP-glucuronosyltransferases. The locus includes thirteen unique alternate first exons followed by four common ex…	chr2:233636477-233773305
am	AM1	5281426	54576	H. sapiens	54576	H. sapiens	UGT1A8	GNT1|UDPGT|UDPGT 1-8|UGT-1A|UGT-1H|UGT1|UGT1-01|UGT1-08|UGT1.1|UGT1.8|UGT1A|UGT1A1|UGT1A8S|UGT1H|hUG-BR1	protein-coding	UDP glucuronosyltransferase family 1 member A8	This gene encodes a UDP-glucuronosyltransferase, an enzyme of the glucuronidation pathway that transforms small lipophilic molecules, such as steroids, bilirubin, hormones, and drugs, into water-soluble, excretable metabolites. This gene is part of a complex locus that encodes several UDP-glucuronosyltransferases. The locus includes thirteen unique alternate first exons followed by four common ex…	chr2:233617645-233773299
am	AM1	5281426	54657	H. sapiens	54657	H. sapiens	UGT1A4	GNT1|HUG-BR2|UDPGT|UDPGT 1-4|UGT-1A|UGT-1D|UGT1|UGT1-01|UGT1-04|UGT1.1|UGT1.4|UGT1A|UGT1A1|UGT1A4S|UGT1D|hUG-BR1	protein-coding	UDP glucuronosyltransferase family 1 member A4	This gene encodes a UDP-glucuronosyltransferase, an enzyme of the glucuronidation pathway that transforms small lipophilic molecules, such as steroids, bilirubin, hormones, and drugs, into water-soluble, excretable metabolites. This gene is part of a complex locus that encodes several UDP-glucuronosyltransferases. The locus includes thirteen unique alternate first exons followed by four common ex…	chr2:233718736-233773300
am	AM1	5281426	54658	H. sapiens	54658	H. sapiens	UGT1A1	BILIQTL1|GNT1|HUG-BR1|UDPGT|UDPGT 1-1|UGT1|UGT1A	protein-coding	UDP glucuronosyltransferase family 1 member A1	This gene encodes a UDP-glucuronosyltransferase, an enzyme of the glucuronidation pathway that transforms small lipophilic molecules, such as steroids, bilirubin, hormones, and drugs, into water-soluble, excretable metabolites. This gene is part of a complex locus that encodes several UDP-glucuronosyltransferases. The locus includes thirteen unique alternate first exons followed by four common ex…	chr2:233760270-233773300
am	AM1	5281426	54659	H. sapiens	54659	H. sapiens	UGT1A3	UDPGT|UDPGT 1-3|UGT-1C|UGT1-03|UGT1.3|UGT1A3S|UGT1C	protein-coding	UDP glucuronosyltransferase family 1 member A3	This gene encodes a UDP-glucuronosyltransferase, an enzyme of the glucuronidation pathway that transforms small lipophilic molecules, such as steroids, bilirubin, hormones, and drugs, into water-soluble, excretable metabolites. This gene is part of a complex locus that encodes several UDP-glucuronosyltransferases. The locus includes thirteen unique alternate first exons followed by four common ex…	chr2:233729042-233773300
m	M2	5281792	55775	H. sapiens	55775	H. sapiens	TDP1		protein-coding	tyrosyl-DNA phosphodiesterase 1	The protein encoded by this gene is involved in repairing stalled topoisomerase I-DNA complexes by catalyzing the hydrolysis of the phosphodiester bond between the tyrosine residue of topoisomerase I and the 3-prime phosphate of DNA. This protein may also remove glycolate from single-stranded DNA containing 3-prime phosphoglycolate, suggesting a role in repair of free-radical mediated DNA double-…	chr14:89955927-90044764
b	B3	44202892	55775	H. sapiens	55775	H. sapiens	TDP1		protein-coding	tyrosyl-DNA phosphodiesterase 1	The protein encoded by this gene is involved in repairing stalled topoisomerase I-DNA complexes by catalyzing the hydrolysis of the phosphodiester bond between the tyrosine residue of topoisomerase I and the 3-prime phosphate of DNA. This protein may also remove glycolate from single-stranded DNA containing 3-prime phosphoglycolate, suggesting a role in repair of free-radical mediated DNA double-…	chr14:89955927-90044764
m	M2	5315615	55775	H. sapiens	55775	H. sapiens	TDP1		protein-coding	tyrosyl-DNA phosphodiesterase 1	The protein encoded by this gene is involved in repairing stalled topoisomerase I-DNA complexes by catalyzing the hydrolysis of the phosphodiester bond between the tyrosine residue of topoisomerase I and the 3-prime phosphate of DNA. This protein may also remove glycolate from single-stranded DNA containing 3-prime phosphoglycolate, suggesting a role in repair of free-radical mediated DNA double-…	chr14:89955927-90044764
g	G3	5282073	55775	H. sapiens	55775	H. sapiens	TDP1		protein-coding	tyrosyl-DNA phosphodiesterase 1	The protein encoded by this gene is involved in repairing stalled topoisomerase I-DNA complexes by catalyzing the hydrolysis of the phosphodiester bond between the tyrosine residue of topoisomerase I and the 3-prime phosphate of DNA. This protein may also remove glycolate from single-stranded DNA containing 3-prime phosphoglycolate, suggesting a role in repair of free-radical mediated DNA double-…	chr14:89955927-90044764
z	Z1	442793	55775	H. sapiens	55775	H. sapiens	TDP1		protein-coding	tyrosyl-DNA phosphodiesterase 1	The protein encoded by this gene is involved in repairing stalled topoisomerase I-DNA complexes by catalyzing the hydrolysis of the phosphodiester bond between the tyrosine residue of topoisomerase I and the 3-prime phosphate of DNA. This protein may also remove glycolate from single-stranded DNA containing 3-prime phosphoglycolate, suggesting a role in repair of free-radical mediated DNA double-…	chr14:89955927-90044764
b	B2	44202895	58190	H. sapiens	58190	H. sapiens	CTDSP1	NIF3|NLI-IF|NLIIF|SCP1	protein-coding	CTD small phosphatase 1	This gene encodes a member of the small C-terminal domain phosphatase (SCP) family of nuclear phosphatases. These proteins play a role in transcriptional regulation through specific dephosphorylation of phosphoserine 5 within tandem heptapeptide repeats of the C-terminal domain of RNA polymerase II. The encoded protein plays a role in neuronal gene silencing in non-neuronal cells, and may also in…	chr2:218398233-218405941;chr2:218399868-218405941
am	AM1	5281426	58819	R. norvegicus	7296	H. sapiens	TXNRD1	GRIM-12|TR|TR1|TRXR1|TXNR	protein-coding	thioredoxin reductase 1	The protein encoded by this gene belongs to the pyridine nucleotide-disulfide oxidoreductase family, and is a member of the thioredoxin (Trx) system. Three thioredoxin reductase (TrxR) isozymes are found in mammals. TrxRs are selenocysteine-containing flavoenzymes, which reduce thioredoxins, as well as other substrates, and play a key role in redox homoeostasis. This gene encodes an ubiquitously …	chr12:104287032-104350307;chr12:104215779-104350307
g	G1	14982	58978	R. norvegicus	28234	H. sapiens	SLCO1B3	HBLRR|LST-2|LST-3TM13|LST3|OATP-8|OATP1B3|OATP8|SLC21A8	protein-coding	solute carrier organic anion transporter family member 1B3	This gene encodes a liver-specific member of the organic anion transporter family. The encoded protein is a transmembrane receptor that mediates the sodium-independent uptake of endogenous and xenobiotic compounds and plays a critical role in bile acid and bilirubin transport. Mutations in this gene are a cause of Rotor type hyperbilirubinemia. Alternative splicing of this gene and the use of alt…	chr12:20810705-20916909;chr12:20822548-20916909
m	M2	5315615	76768	M. musculus	250	H. sapiens	ALPP	ALP|ALPI|IAP|PALP|PLAP|PLAP-1	protein-coding	alkaline phosphatase, placental	The protein encoded by this gene is an alkaline phosphatase, a metalloenzyme that catalyzes the hydrolysis of phosphoric acid monoesters. It belongs to a multigene family composed of four alkaline phosphatase isoenzymes. The enzyme functions as a homodimer and has a catalytic site containing one magnesium and two zinc ions, which are required for its enzymatic function. The protein is primarily e…	chr2:232378751-232382889
m	M2	5281792	79915	H. sapiens	79915	H. sapiens	ATAD5	C17orf41|ELG1|FRAG1	protein-coding	ATPase family AAA domain containing 5		chr17:30831966-30895865
b	B3	44202892	79915	H. sapiens	79915	H. sapiens	ATAD5	C17orf41|ELG1|FRAG1	protein-coding	ATPase family AAA domain containing 5		chr17:30831966-30895865
g	G4	5280378	79915	H. sapiens	79915	H. sapiens	ATAD5	C17orf41|ELG1|FRAG1	protein-coding	ATPase family AAA domain containing 5		chr17:30831966-30895865
g	G2	442813	79915	H. sapiens	79915	H. sapiens	ATAD5	C17orf41|ELG1|FRAG1	protein-coding	ATPase family AAA domain containing 5		chr17:30831966-30895865
g	G2	3733033	79915	H. sapiens	79915	H. sapiens	ATAD5	C17orf41|ELG1|FRAG1	protein-coding	ATPase family AAA domain containing 5		chr17:30831966-30895865
g	G1	14982	80900	R. norvegicus	6579	H. sapiens	SLCO1A2	OATP|OATP-A|OATP1A2|SLC21A3	protein-coding	solute carrier organic anion transporter family member 1A2	This gene encodes a sodium-independent transporter which mediates cellular uptake of organic ions in the liver. Its substrates include bile acids, bromosulphophthalein, and some steroidal compounds. The protein is a member of the SLC21A family of solute carriers. Alternative splicing of this gene results in multiple transcript variants. [provided by RefSeq, Dec 2008]	chr12:21264600-21334917;chr12:21264600-21395437
m	M2	5281792	81686	R. norvegicus	4313	H. sapiens	MMP2	CLG4|CLG4A|MMP-2|MMP-II|MONA|TBE-1	protein-coding	matrix metallopeptidase 2	This gene is a member of the matrix metalloproteinase (MMP) gene family, that are zinc-dependent enzymes capable of cleaving components of the extracellular matrix and molecules involved in signal transduction. The protein encoded by this gene is a gelatinase A, type IV collagenase, that contains three fibronectin type II repeats in its catalytic site that allow binding of denatured type IV and V…	chr16:55480533-55506691;chr16:55479998-55506691;chr16:55478830-55506691;chr16:55479198-55506691;chr16:55481557-55506691
m	M1	6441498	81686	R. norvegicus	4313	H. sapiens	MMP2	CLG4|CLG4A|MMP-2|MMP-II|MONA|TBE-1	protein-coding	matrix metallopeptidase 2	This gene is a member of the matrix metalloproteinase (MMP) gene family, that are zinc-dependent enzymes capable of cleaving components of the extracellular matrix and molecules involved in signal transduction. The protein encoded by this gene is a gelatinase A, type IV collagenase, that contains three fibronectin type II repeats in its catalytic site that allow binding of denatured type IV and V…	chr16:55480533-55506691;chr16:55479998-55506691;chr16:55478830-55506691;chr16:55479198-55506691;chr16:55481557-55506691
m	M2	5315615	83523	R. norvegicus	3612	H. sapiens	IMPA1	IMP|IMPA|MRT59	protein-coding	inositol monophosphatase 1	This gene encodes an enzyme that dephosphorylates myo-inositol monophosphate to generate free myo-inositol, a precursor of phosphatidylinositol, and is therefore an important modulator of intracellular signal transduction via the production of the second messengers myoinositol 1,4,5-trisphosphate and diacylglycerol. This enzyme can also use myo-inositol-1,3-diphosphate, myo-inositol-1,4-diphospha…	chr8:81656914-81686325;chr8:81656916-81686354
g	G1	14982	114516	R. norvegicus	8001	H. sapiens	GLRA3		protein-coding	glycine receptor alpha 3	This gene encodes a member of the ligand-gated ion channel protein family. The encoded protein is a member of the glycine receptor subfamily. Alternative splicing results in multiple transcript variants. [provided by RefSeq, Nov 2013]	chr4:174636920-174829247
z	Z1	442793	277328	M. musculus	8989	H. sapiens	TRPA1	ANKTM1|FEPS|FEPS1	protein-coding	transient receptor potential cation channel subfamily A member 1	The structure of the protein encoded by this gene is highly related to both the protein ankyrin and transmembrane proteins. The specific function of this protein has not yet been determined; however, studies indicate the function may involve a role in signal transduction and growth control. [provided by RefSeq, Jul 2008]	chr8:72021250-72075584
z	Z1	3473	312896	R. norvegicus	8989	H. sapiens	TRPA1	ANKTM1|FEPS|FEPS1	protein-coding	transient receptor potential cation channel subfamily A member 1	The structure of the protein encoded by this gene is highly related to both the protein ankyrin and transmembrane proteins. The specific function of this protein has not yet been determined; however, studies indicate the function may involve a role in signal transduction and growth control. [provided by RefSeq, Jul 2008]	chr8:72021250-72075584
g	G1	14982	729230	H. sapiens	729230	H. sapiens	CCR2	CC-CKR-2|CCR-2|CCR2A|CCR2B|CD192|CKR2|CKR2A|CKR2B|CMKBR2|MCP-1-R	protein-coding	C-C motif chemokine receptor 2	The protein encoded by this gene is a receptor for monocyte chemoattractant protein-1, a chemokine which specifically mediates monocyte chemotaxis. Monocyte chemoattractant protein-1 is involved in monocyte infiltration in inflammatory diseases such as rheumatoid arthritis as well as in the inflammatory response against tumors. The encoded protein mediates agonist-dependent calcium mobilization a…	chr3:46353744-46360922;chr3:46354111-46360929
