# Supplementary material for: Free Wanderer Powder regulates AMPA receptor homeostasis in chronic restraint stress-induced rat model of depression with liver-depression and spleen-deficiency syndrome
Source: Aging (Albany NY). 2020 Oct 14;12(19):19563–84. doi: 10.18632/aging.103912 (PMC7732332; doi:10.18632/aging.103912)
Supplement: Supplementary Table 3 [file aging-12-103912-s004..xlsx]

## Sheet: Sheet1
Table S3. Specific DisGeNET enrichment items of targets in FWP and each herb.
ID	Description	BgRatio	TargetRatio	TargetCount	LogP	Log(q-value)	Targets	Herb
C0525045	Mood Disorders	187/24156	0.187166	35	-38	-34	ADORA2A|ADRA1B|ADRA2A|ADRA2C|ADRB1|ADRB3|AKT1|AR|CHRM2|CHRM3|CYP2D6|DRD2|DRD3|DRD4|ESR1|NR3C1|HTT|HTR1A|HTR1B|HTR2A|HTR2C|HTR6|MAOA|MAOB|NFKB1|NPY2R|OPRK1|PPARG|PTGS2|RARA|SLC6A2|SLC6A3|SLC6A4|TACR1|SIGMAR1	g
C0525045	Mood Disorders	187/24156	0.141818	39	-37	-33	ADORA2A|ADRA1B|ADRA2A|ADRA2C|ADRB1|ADRB3|AKT1|AR|CHRM2|CHRM3|CRHBP|CRHR2|CRYZ|CYP2D6|DRD2|DRD3|DRD4|ESR1|NR3C1|HTT|HTR1A|HTR1B|HTR2A|HTR2C|HTR6|HTR7|MAOA|MAOB|NFKB1|NPY2R|OPRK1|PPARG|PTGS2|RARA|SLC6A2|SLC6A3|SLC6A4|TACR1|SIGMAR1	total
C0011581	Depressive disorder	414/24156	0.181818	50	-36	-32	ADRA2A|ADRB1|AKT1|APP|AR|BRCA1|CHRM2|CNR1|CRHBP|CRHR2|CYP2C19|CYP2D6|DRD1|DRD2|DRD3|DRD4|ESR1|GBA|GNAS|NR3C1|HTT|HSD11B1|HTR1A|HTR1B|HTR2A|HTR2C|HTR7|IL1B|LTA4H|MAOA|MAOB|MAPT|MC4R|NOS1|NOS2|NPY1R|OPRK1|OPRM1|PDE4B|MAPK3|PTGS2|ATXN2|SLC6A2|SLC6A3|SLC6A4|SRD5A1|STAT3|TACR1|TTR|HDAC9	total
C0011581	Depressive disorder	414/24156	0.208556	39	-30	-27	ADRA2A|ADRB1|AKT1|AR|BRCA1|CHRM2|CNR1|CYP2C19|CYP2D6|DRD1|DRD2|DRD3|DRD4|ESR1|GNAS|NR3C1|HTT|HSD11B1|HTR1A|HTR1B|HTR2A|HTR2C|MAOA|MAOB|MAPT|MC4R|NOS1|NOS2|NPY1R|OPRK1|OPRM1|PDE4B|MAPK3|PTGS2|SLC6A2|SLC6A3|SLC6A4|TACR1|HDAC9	g
C0011581	Depressive disorder	414/24156	0.108434	9	-4.9	-3.4	APP|DRD3|GBA|HTT|IL1B|MAPT|PTGS2|STAT3|TTR	m
C0011581	Depressive disorder	414/24156	0.0833333	5	-2.4	-1.4	APP|GBA|PTGS2|ATXN2|SRD5A1	am
C0011581	Depressive disorder	414/24156	0.333333	3	-3.4	-2.2	HTR1A|LTA4H|PTGS2	z
C0011570	Mental Depression	260/24156	0.156364	43	-36	-33	ADRA2A|ADRB1|AKT1|APP|AR|BRCA1|CHRM2|CNR1|CRHBP|CRHR2|CYP2C19|CYP2D6|DRD1|DRD2|DRD3|DRD4|ESR1|NR3C1|HTT|HSD11B1|HTR1A|HTR1B|HTR2A|HTR2C|HTR7|IL1B|LTA4H|MAOA|MAOB|MC4R|NOS2|OPRK1|OPRM1|PDE4B|MAPK3|PTGS2|SLC6A2|SLC6A3|SLC6A4|SRD5A1|TACR1|TTR|HDAC9	total
C0011570	Mental Depression	260/24156	0.187166	35	-32	-29	ADRA2A|ADRB1|AKT1|AR|BRCA1|CHRM2|CNR1|CYP2C19|CYP2D6|DRD1|DRD2|DRD3|DRD4|ESR1|NR3C1|HTT|HSD11B1|HTR1A|HTR1B|HTR2A|HTR2C|MAOA|MAOB|MC4R|NOS2|OPRK1|OPRM1|PDE4B|MAPK3|PTGS2|SLC6A2|SLC6A3|SLC6A4|TACR1|HDAC9	g
C0011570	Mental Depression	260/24156	0.333333	3	-4	-2.7	HTR1A|LTA4H|PTGS2	z
C0011570	Mental Depression	260/24156	0.0722892	6	-3.6	-2.3	APP|DRD3|HTT|IL1B|PTGS2|TTR	m
C0001973	Alcoholic Intoxication, Chronic	292/24156	0.149091	41	-32	-29	ADRA2A|ALDH1A1|ALDH2|AR|CCKAR|CHRM2|CNR1|CRHBP|CYP2E1|DRD1|DRD2|DRD3|DRD4|EGFR|FYN|GAPDH|HMGB1|HTR1A|HTR1B|HTR2A|HTR2C|HTR7|IL1B|MAOA|MAOB|MMP2|MMP9|NFKB1|NPY2R|OPRD1|OPRK1|OPRM1|PDE4B|RGS4|SLC6A2|SLC6A3|SLC6A4|SRD5A1|TACR1|TP53|SIGMAR1	total
C0001973	Alcoholic Intoxication, Chronic	292/24156	0.181818	34	-29	-26	ADRA2A|ALDH1A1|ALDH2|AR|CCKAR|CHRM2|CNR1|CYP2E1|DRD1|DRD2|DRD3|DRD4|EGFR|FYN|HMGB1|HTR1A|HTR1B|HTR2A|HTR2C|MAOA|MAOB|MMP9|NFKB1|NPY2R|OPRD1|OPRK1|OPRM1|PDE4B|SLC6A2|SLC6A3|SLC6A4|TACR1|TP53|SIGMAR1	g
C0005586	Bipolar Disorder	516/24156	0.16	44	-25	-22	ADRA1A|ADRA2C|ADRB2|AKT1|ALDH2|APP|BDKRB2|CCKAR|CHRM2|CHRM3|CNR1|CRHBP|CRHR2|DRD1|DRD2|DRD3|DRD4|ESR1|FYN|NR3C1|HSPA5|HTR1A|HTR1B|HTR2A|HTR2C|IL1B|IMPA1|MAOA|MAOB|MAPT|MC5R|MMP9|OPRK1|PDE4B|PPARD|MAPK1|RARA|RGS4|SLC6A2|SLC6A3|SLC6A4|SRD5A1|TACR1|VDR	total
C0005586	Bipolar Disorder	516/24156	0.197861	37	-24	-21	ADRA1A|ADRA2C|ADRB2|AKT1|ALDH2|BDKRB2|CCKAR|CHRM2|CHRM3|CNR1|DRD1|DRD2|DRD3|DRD4|ESR1|FYN|NR3C1|HSPA5|HTR1A|HTR1B|HTR2A|HTR2C|MAOA|MAOB|MAPT|MC5R|MMP9|OPRK1|PDE4B|PPARD|MAPK1|RARA|SLC6A2|SLC6A3|SLC6A4|TACR1|VDR	g
C0005586	Bipolar Disorder	516/24156	0.0722892	6	-2.1	-1.1	APP|DRD3|FYN|IL1B|IMPA1|MAPT	m
C0020538	Hypertensive disease	303/24156	0.130909	36	-25	-22	ADRA2A|ADRB1|AGTR2|AHR|AR|BDKRB2|CRHR2|CYP1A1|DRD2|EDNRA|EGFR|GLA|GNAS|NR3C1|HSD11B1|HSD11B2|HTR2B|IL1B|JUN|LMNA|LYZ|SMAD3|MMP2|MMP9|ABCC1|NOS2|PLG|PPARA|PPARG|PTGS2|RELA|SLC6A2|TACR1|TP53|VDR|ERAP1	total
C0038587	Substance Withdrawal Syndrome	53/24156	0.0727273	20	-25	-22	ADORA1|ADORA2A|CHRM5|CNR1|DRD2|GNAI1|GNAO1|GNAS|HRH1|HRH2|HTR2C|MMP9|NOS2|NPY2R|OPRD1|OPRK1|MAPK1|MAPK3|SLC6A4|TACR1	total
C0038587	Substance Withdrawal Syndrome	53/24156	0.0962567	18	-25	-22	ADORA1|ADORA2A|CHRM5|CNR1|DRD2|GNAS|HRH1|HRH2|HTR2C|MMP9|NOS2|NPY2R|OPRD1|OPRK1|MAPK1|MAPK3|SLC6A4|TACR1	g
C0020538	Hypertensive disease	303/24156	0.160428	30	-24	-21	ADRA2A|ADRB1|AGTR2|AHR|AR|BDKRB2|CYP1A1|DRD2|EDNRA|EGFR|GLA|GNAS|NR3C1|HSD11B1|HSD11B2|HTR2B|LYZ|SMAD3|MMP9|ABCC1|NOS2|PLG|PPARA|PPARG|PTGS2|RELA|SLC6A2|TACR1|TP53|VDR	g
C1269683	Major Depressive Disorder	262/24156	0.112727	31	-22	-19	ADRA1A|ADRB3|BDKRB2|CCKAR|CHRM3|CNR1|CRHBP|CRYZ|CYP2C19|CYP2C9|CYP2D6|DRD2|DRD3|DRD4|EGFR|ESR2|NR3C1|HTR1A|HTR1B|HTR2A|HTR2C|IL1B|IL2|MAOA|MAOB|MPO|PLG|PTGS2|SLC6A2|SLC6A4|XDH	total
C1269683	Major Depressive Disorder	262/24156	0.139037	26	-21	-18	ADRA1A|ADRB3|BDKRB2|CCKAR|CHRM3|CNR1|CYP2C19|CYP2C9|CYP2D6|DRD2|DRD3|DRD4|EGFR|ESR2|NR3C1|HTR1A|HTR1B|HTR2A|HTR2C|IL2|MAOA|MAOB|PLG|PTGS2|SLC6A2|SLC6A4	g
C1269683	Major Depressive Disorder	262/24156	0.060241	5	-2.7	-1.6	DRD3|IL1B|MPO|PLG|PTGS2	m
C0041696	Unipolar Depression	256/24156	0.139037	26	-21	-18	ADRA1A|ADRB3|BDKRB2|CCKAR|CHRM3|CNR1|CYP2C19|CYP2C9|CYP2D6|DRD2|DRD3|DRD4|EGFR|ESR2|NR3C1|HTR1A|HTR1B|HTR2A|HTR2C|MAOA|MAOB|PLG|PTGS2|SLC6A2|SLC6A4|HDAC9	g
C0041696	Unipolar Depression	256/24156	0.105455	29	-20	-17	ADRA1A|ADRB3|BDKRB2|CCKAR|CHRM3|CNR1|CRHBP|CRYZ|CYP2C19|CYP2C9|CYP2D6|DRD2|DRD3|DRD4|EGFR|ESR2|NR3C1|HTR1A|HTR1B|HTR2A|HTR2C|IL1B|MAOA|MAOB|PLG|PTGS2|SLC6A2|SLC6A4|HDAC9	total
C0028754	Obesity	275/24156	0.144385	27	-21	-18	ADRB1|ADRB2|ADRB3|AHR|AKT1|CASP1|CNR1|CYP2E1|CYP19A1|ESR1|GNAS|HSD11B1|HSPA5|HTR2A|HTR2C|MC3R|MC4R|MMP9|NPC1|NPY1R|PPARA|PPARD|PPARG|PTGS2|PTPN1|NR1I2|NR1I3	g
C0033578	Prostatic Neoplasms	492/24156	0.141818	39	-21	-18	ACHE|ADRB2|AHR|AKT1|APEX1|AR|BRCA1|CYP1A1|CYP2A6|CYP2C19|CYP2E1|CYP3A4|CYP19A1|EGFR|ERBB2|ESR1|ESR2|NR3C1|HPGD|IL2|MMP9|MPO|NFE2L2|PLAU|PLAUR|PPARA|PPP3CA|MAPK3|PTGS2|RXRA|SRD5A1|STAT3|TBXAS1|TP53|UGT2B15|VDR|GSTO1|ABCC4|CBX1	total
C0041755	Adverse reaction to drug	61/24156	0.0654545	18	-20	-18	ACHE|ADORA1|ADORA2A|ABCC2|CYP1A2|CYP2C9|CYP2D6|CYP2E1|HMGB1|HTR2B|ABCC1|NFE2L2|PPARA|PTGS2|ABCG2|ABCC4|SLCO1B1|UGT1A1	total
C0236733	Amphetamine-Related Disorders	75/24156	0.0909091	17	-20	-17	ACHE|ADORA2A|AKT1|CYP2D6|DRD1|DRD2|DRD3|DRD4|HTR1B|HTR6|NOS1|NPY1R|OPRM1|PDE4B|RELA|SLC6A3|SLC6A4	g
C1458155	Mammary Neoplasms	448/24156	0.134545	37	-20	-18	ACHE|AHR|AKT1|AR|BRCA1|CASP7|CYP1A1|CYP2D6|CYP3A4|CYP19A1|EGFR|ERBB2|ESR1|ESR2|ESRRA|FLT1|IL1B|JUN|LMNA|MMP1|MMP2|MMP9|ABCC1|NOS2|PGR|PTGS1|PTGS2|RARA|RECQL|RELA|SRC|STAT3|TP53|VDR|ABCG2|SLCO1B1|PABPC1	total
C0028754	Obesity	275/24156	0.109091	30	-20	-17	ADRB1|ADRB2|ADRB3|AHR|AKT1|CA4|CASP1|CNR1|CYP2E1|CYP19A1|ESR1|GNAS|HSD11B1|HSPA5|HTR2A|HTR2C|LMNA|MC3R|MC4R|MMP9|NPC1|NPY1R|PPARA|PPARD|PPARG|PTGS2|PTPN1|TRPV1|NR1I2|NR1I3	total
C0085762	Alcohol abuse	44/24156	0.0748663	14	-19	-16	ALDH1A1|ALDH2|CYP2E1|DRD2|DRD3|DRD4|EGFR|FYN|HTR1A|HTR2A|MAOA|OPRM1|SLC6A3|SLC6A4	g
C0236736	Cocaine-Related Disorders	108/24156	0.0763636	21	-19	-17	CHRM5|CNR1|CRHBP|CRHR2|DRD1|DRD2|DRD3|ESR2|NR3C1|HTR1A|HTR1B|HTR2A|NPY2R|OPRK1|OPRM1|MAPK1|MAPK3|SLC6A3|SLC6A4|SIGMAR1|EHMT2	total
C0033578	Prostatic Neoplasms	492/24156	0.165775	31	-19	-16	ACHE|ADRB2|AHR|AKT1|AR|BRCA1|CYP1A1|CYP2A6|CYP2C19|CYP2E1|CYP3A4|CYP19A1|EGFR|ERBB2|ESR1|ESR2|NR3C1|HPGD|IL2|MMP9|NFE2L2|PLAU|PLAUR|PPARA|PPP3CA|MAPK3|PTGS2|RXRA|TBXAS1|TP53|VDR	g
C0041755	Adverse reaction to drug	61/24156	0.0802139	15	-18	-16	ACHE|ADORA1|ADORA2A|ABCC2|CYP1A2|CYP2C9|CYP2D6|CYP2E1|HMGB1|HTR2B|ABCC1|NFE2L2|PPARA|PTGS2|SLCO1B1	g
C0085762	Alcohol abuse	44/24156	0.0545455	15	-18	-16	ALDH1A1|ALDH2|CYP2E1|DRD2|DRD3|DRD4|EGFR|FYN|HTR1A|HTR2A|MAOA|MMP2|OPRM1|SLC6A3|SLC6A4	total
C0236736	Cocaine-Related Disorders	108/24156	0.0962567	18	-18	-16	CHRM5|CNR1|DRD1|DRD2|DRD3|ESR2|NR3C1|HTR1A|HTR1B|HTR2A|NPY2R|OPRK1|OPRM1|MAPK1|MAPK3|SLC6A3|SLC6A4|SIGMAR1	g
C0020429	Hyperalgesia	80/24156	0.0654545	18	-18	-15	ALOX5|BDKRB2|CNR1|DRD3|HMGB1|HTR2A|IL1B|INSR|NOS1|NOS2|OPRM1|MAPK1|MAPK3|PTGS1|PTGS2|TACR1|TRPV1|TRPA1	total
C0020649	Hypotension	82/24156	0.0855615	16	-18	-15	ADORA1|ADORA2A|ADRA1B|ADRA2A|BDKRB2|CNR1|DRD1|DRD2|HRH1|HTR1B|IL2|MAOA|MAOB|MEN1|NFKB2|PLAU	g
C0236733	Amphetamine-Related Disorders	75/24156	0.0618182	17	-17	-15	ACHE|ADORA2A|AKT1|CYP2D6|DRD1|DRD2|DRD3|DRD4|HTR1B|HTR6|NOS1|NPY1R|OPRM1|PDE4B|RELA|SLC6A3|SLC6A4	total
C0011853	Diabetes Mellitus, Experimental	107/24156	0.0690909	19	-17	-14	ADRA1A|ADRB3|CASP3|CHRM2|CYP1A1|ESRRA|HSD11B1|IL1B|INSR|MMP2|MMP9|MPO|NOS2|PPARA|PPARG|PRKCA|PTGS2|RELA|TP53	total
C1458155	Mammary Neoplasms	448/24156	0.149733	28	-17	-14	ACHE|AHR|AKT1|AR|BRCA1|CASP7|CYP1A1|CYP2D6|CYP3A4|CYP19A1|EGFR|ERBB2|ESR1|ESR2|ESRRA|FLT1|MMP1|MMP9|ABCC1|NOS2|PGR|PTGS1|PTGS2|RARA|RELA|TP53|VDR|SLCO1B1	g
C0024809	Marijuana Abuse	33/24156	0.0472727	13	-17	-14	AKT1|CHRM5|CNR1|MAPK14|CYP2A6|DRD2|DRD4|EGFR|ESR1|IL1B|PTGS2|SLC6A4|TP53	total
C0024809	Marijuana Abuse	33/24156	0.0641711	12	-17	-14	AKT1|CHRM5|CNR1|MAPK14|CYP2A6|DRD2|DRD4|EGFR|ESR1|PTGS2|SLC6A4|TP53	g
C0001418	Adenocarcinoma	114/24156	0.0690909	19	-16	-14	CA1|CA2|CYP2A6|CYP2E1|CYP19A1|EGFR|ERBB2|ESR1|ESR2|IL1B|KMT2A|NFKB1|PGR|PLAU|PPARG|PTGS2|STAT3|TP53|NR1I2	total
C0011853	Diabetes Mellitus, Experimental	107/24156	0.0855615	16	-16	-13	ADRA1A|ADRB3|CASP3|CHRM2|CYP1A1|ESRRA|HSD11B1|INSR|MMP9|NOS2|PPARA|PPARG|PRKCA|PTGS2|RELA|TP53	g
C0020429	Hyperalgesia	80/24156	0.0802139	15	-16	-14	ALOX5|BDKRB2|CNR1|DRD3|HMGB1|HTR2A|INSR|NOS1|NOS2|OPRM1|MAPK1|MAPK3|PTGS1|PTGS2|TACR1	g
C0020649	Hypotension	82/24156	0.0618182	17	-16	-14	ADORA1|ADORA2A|ADRA1B|ADRA2A|BDKRB2|CNR1|DRD1|DRD2|HRH1|HTR1B|IL1B|IL2|MAOA|MAOB|MEN1|NFKB2|PLAU	total
C0021368	Inflammation	114/24156	0.0690909	19	-16	-14	AHR|AKT1|BDKRB2|CASP1|CRHR2|HMGB1|IL1B|MMP2|MMP9|MPO|NOS2|PLAUR|PPARA|PPARG|PTGS2|RORC|STAT3|TRPV1|TRPA1	total
C0027627	Neoplasm Metastasis	185/24156	0.08	22	-16	-13	AGTR2|AHR|ALOX5|EGFR|ERBB2|ESR1|FLT1|HRH2|IL2|MMP1|MMP2|MMP9|PLAU|PLAUR|MAPK1|MAPK3|PTGS2|STAT3|TP53|PDE5A|ABCC4|EHMT2	total
C0025261	Memory Disorders	40/24156	0.0472727	13	-15	-13	ACHE|APP|CHRM1|DRD2|HTR1A|HTR6|HTR7|IL1B|MAPT|SLC6A3|SLC6A4|STAT3|SIGMAR1	total
C0025261	Memory Disorders	40/24156	0.0481283	9	-11	-8.6	ACHE|CHRM1|DRD2|HTR1A|HTR6|MAPT|SLC6A3|SLC6A4|SIGMAR1	g
C0025261	Memory Disorders	40/24156	0.0481928	4	-5	-3.5	APP|IL1B|MAPT|STAT3	m
C0001418	Adenocarcinoma	114/24156	0.0855615	16	-15	-13	CA2|CYP2A6|CYP2E1|CYP19A1|EGFR|ERBB2|ESR1|ESR2|KMT2A|NFKB1|PGR|PLAU|PPARG|PTGS2|TP53|NR1I2	g
C0007786	Brain Ischemia	92/24156	0.0618182	17	-15	-13	APP|CASP3|CHRM1|CCR4|IL1B|JUN|MMP9|MPO|NFKB1|NOS2|PLAU|MAPK1|MAPK3|PTGS2|RELA|STAT3|TP53	total
C0018800	Cardiomegaly	115/24156	0.0654545	18	-15	-13	ADRA1B|ADRA2A|ADRA2C|AHR|AKT1|CYP1A1|CYP2E1|GAA|GBA|HTR2B|IL1B|SMAD3|PPARA|PPARD|PRKCA|SRC|STAT3|TTR	total
C4277682	Chemical and Drug Induced Liver Injury	212/24156	0.0836364	23	-15	-13	AHR|CHRM3|ABCC2|CYP2A6|CYP2C19|CYP2C9|CYP2E1|FLT1|HMGB1|HRH2|IL1B|MMP2|ABCC1|NFE2L2|PLG|PPARA|PTGS2|SORD|TTR|NR1I2|NR1I3|NR1H4|CCR2	total
C0600427	Cocaine Dependence	44/24156	0.0641711	12	-15	-13	ADRA1A|CNR1|DRD2|DRD3|HTR1B|MAOA|MC4R|OPRD1|OPRK1|OPRM1|SLC6A3|SLC6A4	g
C2239176	Liver carcinoma	244/24156	0.0872727	24	-15	-13	APEX1|AR|CA2|CYP1A1|CYP2E1|EGFR|ESR1|GAPDH|HMGCR|HSPA5|JUN|KMT2A|MMP2|MMP9|MPO|NFE2L2|PKM|PPARG|PTGS2|RARA|STAT1|TP53|USP2|NR1H4	total
C0036572	Seizures	603/24156	0.127273	35	-15	-12	ACHE|ADORA2A|ADRA1B|AKT1|APEX1|APP|CHRM1|ABCC2|CNR1|DRD1|DRD2|DRD3|GBA|GLA|GLI3|GLRA1|GNAS|HSD17B10|HTT|HTR1A|HTR1B|IL1B|IMPA1|MEN1|NOS1|NOS2|NPC1|OPRK1|OPRM1|PTGS2|SLC6A2|SMARCA4|TP53|TTR|SIGMAR1	total
C0038356	Stomach Neoplasms	303/24156	0.0945455	26	-15	-12	ADRB1|ADRB2|AGTR2|AHR|AKT1|ALOX5|APEX1|CA1|CA2|CYP2A6|EGFR|ERBB2|FYN|GLI3|HTR1A|IL1B|JUN|KMT2A|PLAU|PPARG|MAPK1|MAPK3|PTGS2|SRC|STAT3|TP53	total
C0041755	Adverse reaction to drug	61/24156	0.15	9	-14	-11	ACHE|ABCC2|ABCC1|NFE2L2|PTGS2|ABCG2|ABCC4|SLCO1B1|UGT1A1	am
C0021655	Insulin Resistance	72/24156	0.0695187	13	-14	-12	ADRB2|AHR|AR|CASP1|CYP19A1|EGFR|GNAS|HSD11B1|INSR|MC4R|PPARA|PPARG|PTPN1	g
C0024121	Lung Neoplasms	213/24156	0.08	22	-14	-12	AKT1|MAPK14|CYP1A2|CYP2A6|CYP2E1|EGFR|ERBB2|ESR1|IL1B|IL2|JUN|LMNA|MCL1|MMP1|MPO|NOS2|MAPK1|MAPK3|TP53|TTR|EHMT2|SLCO1B3	total
C0027627	Neoplasm Metastasis	185/24156	0.0962567	18	-14	-12	AGTR2|AHR|ALOX5|EGFR|ERBB2|ESR1|FLT1|HRH2|IL2|MMP1|MMP9|PLAU|PLAUR|MAPK1|MAPK3|PTGS2|TP53|PDE5A	g
C0036572	Seizures	603/24156	0.15508	29	-14	-12	ACHE|ADORA2A|ADRA1B|AKT1|CHRM1|ABCC2|CNR1|DRD1|DRD2|DRD3|GLA|GLI3|GLRA1|GNAS|HSD17B10|HTT|HTR1A|HTR1B|MEN1|NOS1|NOS2|NPC1|OPRK1|OPRM1|PTGS2|SLC6A2|SMARCA4|TP53|SIGMAR1	g
C0004153	Atherosclerosis	59/24156	0.0472727	13	-13	-11	AHR|ALOX5|ESR1|HRH1|LMNA|LTA4H|MMP1|NOS2|NPC1|PPARG|PTGS2|STAT3|TRPV1	total
C4277682	Chemical and Drug Induced Liver Injury	212/24156	0.0962567	18	-13	-11	AHR|CHRM3|ABCC2|CYP2A6|CYP2C19|CYP2C9|CYP2E1|FLT1|HMGB1|HRH2|ABCC1|NFE2L2|PLG|PPARA|PTGS2|NR1I2|NR1I3|CCR2	g
C0600427	Cocaine Dependence	44/24156	0.0436364	12	-13	-11	ADRA1A|CNR1|DRD2|DRD3|HTR1B|MAOA|MC4R|OPRD1|OPRK1|OPRM1|SLC6A3|SLC6A4	total
C0009375	Colonic Neoplasms	142/24156	0.0654545	18	-13	-11	ALOX5|EGFR|ERBB2|IL1B|JUN|KCNH2|MAOB|MMP9|NFKB1|NOS2|POLB|PPARG|PTGS2|RELA|SRC|STAT3|TP53|SLCO1B3	total
C0021655	Insulin Resistance	72/24156	0.0509091	14	-13	-11	ADRB2|AHR|AR|CASP1|CYP19A1|EGFR|GNAS|HSD11B1|INSR|LMNA|MC4R|PPARA|PPARG|PTPN1	total
C0029456	Osteoporosis	164/24156	0.0690909	19	-13	-11	NR0B1|AR|CA2|CALCR|CYP19A1|ESR1|NR5A1|GAPDH|GNAS|HPGD|LMNA|MEN1|MMP1|MMP2|PKM|SMPD1|STAT1|VDR|TNFSF11	total
C0033941	Psychoses, Substance-Induced	17/24156	0.0427807	8	-13	-10	ADORA2A|AKT1|ESR1|HTR1A|HTR6|NPY1R|OPRM1|SLC6A3	g
C0035126	Reperfusion Injury	85/24156	0.0545455	15	-13	-11	ALOX5|CASP3|IL1B|JUN|MMP9|MPO|NOS2|PLAU|PPARA|PPARG|PTGS1|PTGS2|RELA|STAT3|XDH	total
C0038356	Stomach Neoplasms	303/24156	0.106952	20	-13	-10	ADRB1|ADRB2|AGTR2|AHR|AKT1|ALOX5|CA2|CYP2A6|EGFR|ERBB2|FYN|GLI3|HTR1A|KMT2A|PLAU|PPARG|MAPK1|MAPK3|PTGS2|TP53	g
C2609414	Acute kidney injury	72/24156	0.0472727	13	-12	-9.6	BDKRB2|CCR5|CYP2C19|CYP2C9|CYP2D6|EGFR|GFER|MPO|NFE2L2|NOS2|PPARG|TP53|UGT1A1	total
C0878544	Cardiomyopathies	112/24156	0.0545455	15	-12	-9.4	ADORA2A|ADRB2|AKT1|BDKRB2|MAPK14|CYP2C9|GNAS|IL1B|PPARD|MAPK1|MAPK3|MAPK11|PTGS2|STAT3|TTR	total
C0021361	Female infertility	29/24156	0.0481283	9	-12	-9.9	AR|CYP19A1|ESR1|ESR2|PGR|MAPK1|MAPK3|TP53|NR1I2	g
C0023893	Liver Cirrhosis, Experimental	767/24156	0.130909	36	-12	-10	ACHE|ADORA2A|ADORA3|ADRA1B|ALDH1A1|ALDH2|AKR1B1|APP|CASP1|CASP7|ABCC2|CNR1|CYP1A2|FYN|GLS|HMGCR|IL1B|LTA4H|SMAD2|MMP1|MMP2|MMP9|NFE2L2|NOS2|PLAU|PLG|PTAFR|PTGS1|PTGS2|PTPN1|PTPRC|RELA|SRD5A1|VIPR1|TRPV1|ERAP1	total
C0023893	Liver Cirrhosis, Experimental	767/24156	0.15508	29	-12	-9.6	ACHE|ADORA2A|ADORA3|ADRA1B|ALDH1A1|ALDH2|AKR1B1|CASP1|CASP7|ABCC2|CNR1|CYP1A2|FYN|GLS|HMGCR|SMAD2|MMP1|MMP9|NFE2L2|NOS2|PLAU|PLG|PTAFR|PTGS1|PTGS2|PTPN1|PTPRC|RELA|VIPR1	g
C0027051	Myocardial Infarction	106/24156	0.0545455	15	-12	-9.7	ADORA1|ADORA3|CASP3|ESR1|GLA|HMGB1|HSD11B2|HSPA5|IL1B|LMNA|MMP2|MMP9|NOS2|PLAU|TP53	total
C0001969	Alcoholic Intoxication	34/24156	0.0363636	10	-11	-9.4	ALDH1A1|ALDH2|DRD4|FYN|NR3C1|MPO|OPRM1|RELA|SLC6A4|TP53	total
C0001969	Alcoholic Intoxication	34/24156	0.0481283	9	-11	-9.2	ALDH1A1|ALDH2|DRD4|FYN|NR3C1|OPRM1|RELA|SLC6A4|TP53	g
C0002395	Alzheimer's Disease	87/24156	0.0472727	13	-11	-8.6	ACHE|APP|CASP3|CYP2D6|ESR1|IL1B|INSR|MAOB|MAPT|MPO|PLAU|PPARG|BACE1	total
C0007786	Brain Ischemia	92/24156	0.0641711	12	-11	-9	CASP3|CHRM1|CCR4|MMP9|NFKB1|NOS2|PLAU|MAPK1|MAPK3|PTGS2|RELA|TP53	g
C0021361	Female infertility	29/24156	0.0327273	9	-11	-8.6	AR|CYP19A1|ESR1|ESR2|PGR|MAPK1|MAPK3|TP53|NR1I2	total
C0027626	Neoplasm Invasiveness	143/24156	0.0581818	16	-11	-9	AHR|ALOX5|CYP2E1|EGFR|IL1B|MMP1|MMP2|MMP9|PKM|PLAU|PLAUR|MAPK1|MAPK3|RELA|SMPD1|SRC	total
C0033941	Psychoses, Substance-Induced	17/24156	0.0290909	8	-11	-9.1	ADORA2A|AKT1|ESR1|HTR1A|HTR6|NPY1R|OPRM1|SLC6A3	total
C0033975	Psychotic Disorders	150/24156	0.0748663	14	-11	-8.8	CCKAR|GNAS|NR3C1|HSD17B10|HTR1B|HTR2A|KCNH2|MAOA|NPC1|NPY1R|OPRD1|OPRM1|PRKCA|PTPRC	g
C0040822	Tremor	113/24156	0.0695187	13	-11	-9.2	ACHE|ADORA2A|ADRA2B|ADRB2|AR|CHRM4|CYP2D6|DRD2|HTR1A|MAPT|MEN1|SLC6A3|TNFSF11	g
C0018800	Cardiomegaly	115/24156	0.0641711	12	-10	-7.9	ADRA1B|ADRA2A|ADRA2C|AHR|AKT1|CYP1A1|CYP2E1|HTR2B|SMAD3|PPARA|PPARD|PRKCA	g
C0878544	Cardiomyopathies	112/24156	0.0641711	12	-10	-8.1	ADORA2A|ADRB2|AKT1|BDKRB2|MAPK14|CYP2C9|GNAS|PPARD|MAPK1|MAPK3|MAPK11|PTGS2	g
C0009375	Colonic Neoplasms	142/24156	0.0695187	13	-10	-8	ALOX5|EGFR|ERBB2|KCNH2|MAOB|MMP9|NFKB1|NOS2|PPARG|PTGS2|RELA|TP53|SLCO1B3	g
C0020429	Hyperalgesia	80/24156	0.555556	5	-10	-8.3	ALOX5|PTGS1|PTGS2|TRPV1|TRPA1	z
C0021368	Inflammation	114/24156	0.0641711	12	-10	-8	AHR|AKT1|BDKRB2|CASP1|HMGB1|MMP9|NOS2|PLAUR|PPARA|PPARG|PTGS2|RORC	g
C0027051	Myocardial Infarction	106/24156	0.0641711	12	-10	-8.3	ADORA1|ADORA3|CASP3|ESR1|GLA|HMGB1|HSD11B2|HSPA5|MMP9|NOS2|PLAU|TP53	g
C0029456	Osteoporosis	164/24156	0.0748663	14	-10	-8.3	NR0B1|AR|CA2|CALCR|CYP19A1|ESR1|NR5A1|GNAS|HPGD|MEN1|MMP1|SMPD1|VDR|TNFSF11	g
C0030193	Pain	79/24156	0.0436364	12	-10	-8	AKT1|BDKRB2|CNR1|DRD2|HRH1|HTR1A|HTR7|IL2|OPRK1|ATXN2|TRPV1|TRPA1	total
C0030567	Parkinson Disease	63/24156	0.0534759	10	-10	-8.2	CYP2D6|CYP2E1|DRD1|DRD2|INSR|MAOA|MAOB|MAPT|NOS1|SLC6A3	g
C0038002	Splenomegaly	189/24156	0.0618182	17	-10	-8.1	AHR|AKT1|APP|CA2|CYP1A2|GAA|GBA|GUSB|LYZ|MAPT|NFKB1|NFKB2|NPC1|PTPRC|SMPD1|TP53|TNFSF11	total
C0040822	Tremor	113/24156	0.0509091	14	-10	-8.3	ACHE|ADORA2A|ADRA2B|ADRB2|AR|CHRM4|CYP2D6|DRD2|HTR1A|MAPT|MEN1|SLC6A3|TTR|TNFSF11	total
C0024121	Lung Neoplasms	213/24156	0.0802139	15	-9.9	-7.8	AKT1|MAPK14|CYP1A2|CYP2A6|CYP2E1|EGFR|ERBB2|ESR1|IL2|MMP1|NOS2|MAPK1|MAPK3|TP53|SLCO1B3	g
C0030567	Parkinson Disease	63/24156	0.04	11	-9.9	-7.9	CYP2D6|CYP2E1|DRD1|DRD2|GBA|INSR|MAOA|MAOB|MAPT|NOS1|SLC6A3	total
C2609414	Acute kidney injury	72/24156	0.0534759	10	-9.7	-7.6	BDKRB2|CCR5|CYP2C19|CYP2C9|CYP2D6|EGFR|NFE2L2|NOS2|PPARG|TP53	g
C0033975	Psychotic Disorders	150/24156	0.0545455	15	-9.7	-7.7	CCKAR|GNAS|NR3C1|HSD17B10|HTR1B|HTR2A|KCNH2|MAOA|NPC1|NPY1R|OPRD1|OPRM1|PRKCA|PTPRC|TYR	total
C0038002	Splenomegaly	189/24156	0.0748663	14	-9.6	-7.5	AHR|AKT1|CA2|CYP1A2|GUSB|LYZ|MAPT|NFKB1|NFKB2|NPC1|PTPRC|SMPD1|TP53|TNFSF11	g
C0027765	nervous system disorder	53/24156	0.0481283	9	-9.6	-7.5	ACHE|ADRB2|CASP3|ABCC2|CYP2C9|GUSB|NOS1|PTGS2|SLC6A3	g
C0027765	nervous system disorder	53/24156	0.0363636	10	-9.4	-7.4	ACHE|ADRB2|CASP3|ABCC2|CYP2C9|GUSB|NOS1|PTGS2|SLC6A3|ABCG2	total
C0027765	nervous system disorder	53/24156	0.0666667	4	-5	-3.5	ACHE|ABCC2|PTGS2|ABCG2	am
C0004153	Atherosclerosis	59/24156	0.0481283	9	-9.1	-7.1	AHR|ALOX5|ESR1|HRH1|MMP1|NOS2|NPC1|PPARG|PTGS2	g
C2239176	Liver carcinoma	244/24156	0.0802139	15	-9.1	-7.1	AR|CA2|CYP1A1|CYP2E1|EGFR|ESR1|HMGCR|HSPA5|KMT2A|MMP9|NFE2L2|PPARG|PTGS2|RARA|TP53	g
C0027626	Neoplasm Invasiveness	143/24156	0.0641711	12	-8.9	-6.9	AHR|ALOX5|CYP2E1|EGFR|MMP1|MMP9|PLAU|PLAUR|MAPK1|MAPK3|RELA|SMPD1	g
C0035126	Reperfusion Injury	85/24156	0.0534759	10	-8.9	-7	ALOX5|CASP3|MMP9|NOS2|PLAU|PPARA|PPARG|PTGS1|PTGS2|RELA	g
C0027746	Nerve Degeneration	120/24156	0.0472727	13	-8.9	-7	ADORA1|ADRA1B|APP|CASP3|CNR1|GUSB|NOS1|PPARG|MAPK1|MAPK3|ATXN2|SLC6A3|XDH	total
C0027746	Nerve Degeneration	120/24156	0.0534759	10	-7.5	-5.7	ADORA1|ADRA1B|CASP3|CNR1|GUSB|NOS1|PPARG|MAPK1|MAPK3|SLC6A3	g
C0027746	Nerve Degeneration	120/24156	0.05	3	-2.5	-1.5	APP|ATXN2|XDH	am
C0004153	Atherosclerosis	59/24156	0.444444	4	-8.4	-6.5	ALOX5|LTA4H|PTGS2|TRPV1	z
C0029456	Osteoporosis	164/24156	0.108434	9	-8.3	-6.4	CA2|GAPDH|HPGD|LMNA|MMP1|MMP2|PKM|SMPD1|STAT1	m
C2239176	Liver carcinoma	244/24156	0.120482	10	-7.9	-6.1	APEX1|CA2|GAPDH|JUN|MMP2|MPO|PKM|PTGS2|STAT1|USP2	m
C0035126	Reperfusion Injury	85/24156	0.0843373	7	-7.8	-5.9	IL1B|JUN|MPO|PLAU|PTGS1|PTGS2|STAT3	m
C0002395	Alzheimer's Disease	87/24156	0.0481283	9	-7.6	-5.8	ACHE|CASP3|CYP2D6|ESR1|INSR|MAOB|MAPT|PLAU|PPARG	g
C0007786	Brain Ischemia	92/24156	0.0843373	7	-7.5	-5.7	APP|IL1B|JUN|MPO|PLAU|PTGS2|STAT3	m
C0027626	Neoplasm Invasiveness	143/24156	0.0963855	8	-7.5	-5.7	IL1B|MMP1|MMP2|PKM|PLAU|PLAUR|SMPD1|SRC	m
C0023893	Liver Cirrhosis, Experimental	767/24156	0.216667	13	-7.4	-5.6	ACHE|ALDH1A1|AKR1B1|APP|CASP1|CASP7|ABCC2|GLS|NFE2L2|PTGS1|PTGS2|SRD5A1|ERAP1	am
C1458155	Mammary Neoplasms	448/24156	0.144578	12	-7.4	-5.6	IL1B|JUN|LMNA|MMP1|MMP2|PTGS1|PTGS2|RECQL|SRC|STAT3|SLCO1B1|PABPC1	m
C0009241	Cognition Disorders	30/24156	0.0254545	7	-7.4	-5.6	APP|DRD2|DRD3|MAOA|MAPT|PTGS2|SLC6A4	total
C0009241	Cognition Disorders	30/24156	0.0320856	6	-7	-5.2	DRD2|DRD3|MAOA|MAPT|PTGS2|SLC6A4	g
C0009241	Cognition Disorders	30/24156	0.0481928	4	-5.5	-3.9	APP|DRD3|MAPT|PTGS2	m
C0024121	Lung Neoplasms	213/24156	0.108434	9	-7.3	-5.5	IL1B|JUN|LMNA|MCL1|MMP1|MPO|TTR|EHMT2|SLCO1B3	m
C0038356	Stomach Neoplasms	303/24156	0.120482	10	-7	-5.3	APEX1|CA1|CA2|FYN|IL1B|JUN|PLAU|PTGS2|SRC|STAT3	m
C0030193	Pain	79/24156	0.0427807	8	-6.7	-5	AKT1|BDKRB2|CNR1|DRD2|HRH1|HTR1A|IL2|OPRK1	g
C0009375	Colonic Neoplasms	142/24156	0.0843373	7	-6.2	-4.6	IL1B|JUN|POLB|PTGS2|SRC|STAT3|SLCO1B3	m
C0001418	Adenocarcinoma	114/24156	0.0722892	6	-5.6	-4	CA1|CA2|IL1B|PLAU|PTGS2|STAT3	m
C0021368	Inflammation	114/24156	0.0722892	6	-5.6	-4	IL1B|MMP2|MPO|PLAUR|PTGS2|STAT3	m
C0030193	Pain	79/24156	0.333333	3	-5.6	-4	HTR1A|TRPV1|TRPA1	z
C0018800	Cardiomegaly	115/24156	0.0722892	6	-5.5	-4	GAA|GBA|IL1B|SRC|STAT3|TTR	m
C0027627	Neoplasm Metastasis	185/24156	0.0843373	7	-5.5	-3.9	MMP1|MMP2|PLAU|PLAUR|PTGS2|STAT3|EHMT2	m
C0035126	Reperfusion Injury	85/24156	0.333333	3	-5.5	-3.9	ALOX5|PTGS1|PTGS2	z
C0021368	Inflammation	114/24156	0.333333	3	-5.1	-3.6	PTGS2|TRPV1|TRPA1	z
C0001418	Adenocarcinoma	114/24156	0.0833333	5	-5	-3.5	CA1|CA2|KMT2A|PGR|PTGS2	am
C0002395	Alzheimer's Disease	87/24156	0.060241	5	-4.9	-3.4	APP|IL1B|MAPT|MPO|PLAU	m
C4277682	Chemical and Drug Induced Liver Injury	212/24156	0.1	6	-4.8	-3.4	ABCC2|ABCC1|NFE2L2|PTGS2|SORD|NR1H4	am
C1458155	Mammary Neoplasms	448/24156	0.133333	8	-4.8	-3.4	ACHE|CASP7|ABCC1|PGR|PTGS1|PTGS2|ABCG2|SLCO1B1	am
C2239176	Liver carcinoma	244/24156	0.1	6	-4.5	-3.1	CA2|GAPDH|KMT2A|NFE2L2|PTGS2|NR1H4	am
C0033578	Prostatic Neoplasms	492/24156	0.133333	8	-4.5	-3.2	ACHE|HPGD|NFE2L2|PTGS2|SRD5A1|UGT2B15|ABCC4|CBX1	am
C0036572	Seizures	603/24156	0.120482	10	-4.4	-3	APEX1|APP|DRD3|GBA|HSD17B10|HTT|IL1B|IMPA1|PTGS2|TTR	m
C0004153	Atherosclerosis	59/24156	0.0481928	4	-4.3	-2.9	LMNA|MMP1|PTGS2|STAT3	m
C0029456	Osteoporosis	164/24156	0.0833333	5	-4.3	-2.9	CA2|GAPDH|HPGD|MEN1|SMPD1	am
C0033578	Prostatic Neoplasms	492/24156	0.108434	9	-4.3	-3	APEX1|HPGD|MPO|PLAU|PLAUR|PTGS2|STAT3|GSTO1|CBX1	m
C0038002	Splenomegaly	189/24156	0.0722892	6	-4.3	-3	APP|CA2|GAA|GBA|MAPT|SMPD1	m
C0023893	Liver Cirrhosis, Experimental	767/24156	0.13253	11	-4.2	-2.9	AKR1B1|APP|FYN|GLS|IL1B|MMP1|MMP2|PLAU|PLG|PTGS1|PTGS2	m
C0035126	Reperfusion Injury	85/24156	0.0666667	4	-4.2	-2.9	ALOX5|PTGS1|PTGS2|XDH	am
C0023893	Liver Cirrhosis, Experimental	767/24156	0.444444	4	-4	-2.7	LTA4H|PTGS1|PTGS2|TRPV1	z
C0038002	Splenomegaly	189/24156	0.0833333	5	-4	-2.7	APP|CA2|GAA|GBA|SMPD1	am
C0036572	Seizures	603/24156	0.133333	8	-3.9	-2.6	ACHE|APP|ABCC2|GBA|GLA|HSD17B10|MEN1|PTGS2	am
C0020429	Hyperalgesia	80/24156	0.0481928	4	-3.8	-2.5	DRD3|IL1B|PTGS1|PTGS2	m
C0038356	Stomach Neoplasms	303/24156	0.333333	3	-3.8	-2.5	ALOX5|HTR1A|PTGS2	z
C0085762	Alcohol abuse	44/24156	0.0361446	3	-3.3	-2.1	DRD3|FYN|MMP2	m
C0011853	Diabetes Mellitus, Experimental	107/24156	0.0481928	4	-3.3	-2.1	IL1B|MMP2|MPO|PTGS2	m
C0020538	Hypertensive disease	303/24156	0.230769	3	-3.3	-2.1	CRHR2|SMAD3|TP53	b
C0027051	Myocardial Infarction	106/24156	0.0481928	4	-3.3	-2.1	IL1B|LMNA|MMP2|PLAU	m
C0878544	Cardiomyopathies	112/24156	0.0481928	4	-3.2	-2	IL1B|PTGS2|STAT3|TTR	m
C0020538	Hypertensive disease	303/24156	0.0722892	6	-3.2	-2	IL1B|JUN|LMNA|MMP2|PLG|PTGS2	m
C4277682	Chemical and Drug Induced Liver Injury	212/24156	0.060241	5	-3.1	-1.9	IL1B|MMP2|PLG|PTGS2|TTR	m
C0020429	Hyperalgesia	80/24156	0.05	3	-3	-1.9	ALOX5|PTGS1|PTGS2	am
C0020538	Hypertensive disease	303/24156	0.0833333	5	-3	-1.9	GLA|HSD11B2|ABCC1|PTGS2|ERAP1	am
C0038356	Stomach Neoplasms	303/24156	0.0833333	5	-3	-1.9	ALOX5|CA1|CA2|KMT2A|PTGS2	am
C0002395	Alzheimer's Disease	87/24156	0.05	3	-2.9	-1.8	ACHE|APP|BACE1	am
C0001973	Alcoholic Intoxication, Chronic	292/24156	0.060241	5	-2.5	-1.5	DRD3|FYN|GAPDH|IL1B|MMP2	m
C0009375	Colonic Neoplasms	142/24156	0.05	3	-2.3	-1.3	ALOX5|PTGS2|SLCO1B3	am
