# Supplementary material for: Free Wanderer Powder regulates AMPA receptor homeostasis in chronic restraint stress-induced rat model of depression with liver-depression and spleen-deficiency syndrome
Source: Aging (Albany NY). 2020 Oct 14;12(19):19563–84. doi: 10.18632/aging.103912 (PMC7732332; doi:10.18632/aging.103912)
Supplement: Supplementary Table 4 [file aging-12-103912-s005..xlsx]

## Sheet: Sheet1
Table S4. GO and KEGG enrichment items of targets in FWP.
Category	ID	Description	BgRatio	TargetRatio	TargetCount	LogP	Log(q-value)	Targets
GO Biological Processes	GO:0007187	G protein-coupled receptor signaling pathway, coupled to cyclic nucleotide second messenger	261/24156	0.181818	50	-46	-42	ADORA1|ADORA2A|ADRA1D|ADRA1B|ADRA1A|ADRA2A|ADRA2B|ADRA2C|ADRB1|ADRB2|ADRB3|AGTR2|CALCR|CHRM1|CHRM2|CHRM3|CHRM4|CHRM5|CNR1|CRHR2|DRD1|DRD2|DRD3|DRD4|EDNRA|GNAI1|GNAO1|GNAS|HRH1|HRH2|HTR1A|HTR1B|HTR2A|HTR2B|HTR2C|HTR6|HTR7|MC3R|MC4R|MC5R|NOS1|NPY1R|NPY2R|OPRD1|OPRK1|OPRM1|PRKCA|PTH1R|VIPR1|CYSLTR1
GO Biological Processes	GO:0003013	circulatory system process	554/24156	0.232727	64	-45	-41	ADORA1|ADORA2A|ADORA3|ADRA1D|ADRA1B|ADRA1A|ADRA2A|ADRA2B|ADRA2C|ADRB1|ADRB2|ADRB3|AGTR2|AKT1|AR|AVPR1A|BDKRB2|CHRM2|CHRM3|CNR1|CTSG|DRD1|DRD2|DRD3|EDNRA|EGFR|FYN|GAA|GNAO1|HMGCR|HRH1|HRH2|HSD11B2|HTR1A|HTR1B|HTR2A|HTR2B|HTR7|IL2|CXCR2|KCNH2|SMAD3|MC3R|NOS1|NOS2|NPY1R|PDE4B|PPARA|PPARD|PPARG|PTAFR|PTGS1|PTGS2|RGS4|SLC6A4|SRC|STAT1|TACR2|THRB|TRPV1|PDE5A|GSTO1|YAP1|ERAP1
GO Biological Processes	GO:0008015	blood circulation	544/24156	0.225455	62	-43	-39	ADORA1|ADORA2A|ADORA3|ADRA1D|ADRA1B|ADRA1A|ADRA2A|ADRA2B|ADRA2C|ADRB1|ADRB2|ADRB3|AGTR2|AKT1|AR|AVPR1A|BDKRB2|CHRM2|CHRM3|CNR1|CTSG|DRD1|DRD2|DRD3|EDNRA|EGFR|GAA|GNAO1|HMGCR|HRH1|HRH2|HSD11B2|HTR1A|HTR1B|HTR2A|HTR2B|HTR7|IL2|CXCR2|KCNH2|SMAD3|MC3R|NOS1|NOS2|NPY1R|PDE4B|PPARA|PPARD|PPARG|PTAFR|PTGS1|PTGS2|RGS4|SLC6A4|SRC|STAT1|TACR2|THRB|TRPV1|PDE5A|GSTO1|ERAP1
GO Biological Processes	GO:0007610	behavior	617/24156	0.229091	63	-41	-37	ADORA1|ADORA2A|ADRA1D|ADRA1B|ADRA1A|ADRA2A|ADRA2B|ADRA2C|ADRB1|ADRB2|ADRB3|AGTR2|APP|AVPR1A|CASP3|CCKAR|CNR1|CRHBP|DRD1|DRD2|DRD3|DRD4|EGFR|FEN1|FYN|GAA|KAT2A|GLRA1|GLRB|GLS|GNAO1|HTT|HMGCR|HRH1|HRH2|HTR1A|HTR1B|HTR2A|HTR2B|HTR2C|INSR|JUN|MAPT|MC3R|MC4R|NPC1|NPY1R|NPY2R|OPRD1|OPRK1|OPRM1|PPARA|MAPK1|PTGS2|SLC6A3|SLC6A4|SRD5A1|STAT3|TACR2|THRB|TP53|TRPV1|USP2
GO Biological Processes	GO:0071407	cellular response to organic cyclic compound	544/24156	0.207273	57	-37	-34	AGTR2|NR0B1|AHR|AKT1|APEX1|APP|AR|BLM|BRCA1|CASP3|CASP7|CBFB|ABCC2|CRHBP|CYP1A1|DRD1|EGFR|ESR1|ESR2|ESRRA|NR5A1|GNAI1|NR3C1|HRH1|HSPA5|IL1B|NFKB1|NPC1|OPRM1|PDE4B|PGR|PPARA|PPARD|PPARG|MAPK1|MAPK3|PTAFR|PTGS2|RAN|RARA|RORC|RXRA|SIX1|SLC6A4|SMARCA4|SRC|SRD5A1|STAT1|STAT3|THRB|VDR|TRPV1|NR1I2|NR1I3|NR1H4|YAP1|UGT1A1
GO Biological Processes	GO:0009410	response to xenobiotic stimulus	288/24156	0.163636	45	-37	-33	ADORA2A|AGTR2|AHR|ABCC2|CNR1|CRHBP|CRYZ|CYP1A1|CYP1A2|CYP2A6|CYP2C19|CYP2C9|CYP2D6|CYP2E1|CYP3A4|DRD1|DRD2|DRD3|DRD4|EGFR|GBA|NR3C1|HSPA5|HTR1B|HTR2A|OPRM1|PPARG|PPP3CA|PTAFR|PTGS1|RELA|RGS4|RORC|SLC6A3|SMPD1|SRD5A1|STAT5B|UGT2B15|NR1I2|GSTO1|HDAC9|UGT1A10|UGT1A8|UGT1A1|UGT1A3
GO Biological Processes	GO:0007188	adenylate cyclase-modulating G protein-coupled receptor signaling pathway	227/24156	0.149091	41	-36	-33	ADORA1|ADORA2A|ADRA1D|ADRA1B|ADRA1A|ADRA2A|ADRA2B|ADRA2C|ADRB1|ADRB2|ADRB3|CALCR|CHRM1|CHRM2|CHRM3|CHRM4|CHRM5|CNR1|CRHR2|DRD1|DRD2|DRD3|DRD4|EDNRA|GNAI1|GNAO1|GNAS|HTR1A|HTR1B|MC3R|MC4R|MC5R|NOS1|NPY1R|NPY2R|OPRD1|OPRK1|OPRM1|PRKCA|PTH1R|CYSLTR1
GO Biological Processes	GO:0099536	synaptic signaling	733/24156	0.221818	61	-34	-31	ACHE|ADORA1|ADORA2A|ADRA1A|ADRB2|AKT1|APP|CA2|CA7|CHRM1|CHRM2|CHRM3|CHRM4|CHRM5|CNR1|CRHBP|CRHR2|DRD1|DRD2|DRD3|DRD4|EGFR|FYN|KAT2A|GLRA1|GLRA2|GLRB|GLS|GNAI1|HRH1|HRH2|HTR1A|HTR1B|HTR2A|HTR2B|HTR2C|HTR6|HTR7|IL1B|MAPT|NOS1|NPY2R|OPRK1|OPRM1|PLG|PPP3CA|MAPK1|PTGS2|RARA|RELA|RGS4|SLC6A2|SLC6A3|SLC6A4|SRC|STAT3|TACR2|TRPV1|GLRA3|BACE1|CCR2
GO Biological Processes	GO:0044057	regulation of system process	617/24156	0.207273	57	-34	-31	ADORA1|ADORA2A|ADORA3|ADRA1D|ADRA1B|ADRA1A|ADRA2A|ADRA2B|ADRA2C|ADRB1|ADRB2|AGTR2|AKT1|APP|AVPR1A|BDKRB2|CHRM2|CHRM3|CRHBP|DRD2|DRD3|EGFR|GAA|GBA|GLRA1|GLS|GNAO1|GNAS|HRH1|HRH2|HTR2A|HTR2C|IL1B|IL2|KCNH2|LMNA|SMAD3|MC3R|NOS1|NPY2R|OPRD1|OPRK1|OPRM1|PDE4B|PPARA|PPP3CA|PRKCA|PTAFR|PTGS2|RGS4|SRC|TACR2|TACR1|THRB|TRPV1|PDE5A|GSTO1
GO Biological Processes	GO:0032870	cellular response to hormone stimulus	712/24156	0.218182	60	-34	-31	ADRA2A|AGTR2|NR0B1|AKT1|APEX1|AR|AVPR1A|BRCA1|CA2|CBFB|CCKAR|CHRM1|CHRM2|CHRM3|CHRM4|CHRM5|ABCC2|CRHBP|CRHR2|EGFR|ESR1|ESR2|ESRRA|NR5A1|FYN|NR3C1|IL1B|INSR|JUN|MEN1|NFE2L2|NFKB1|NPC1|OPRM1|PGR|PKM|PPARA|PPARD|PPARG|PTPN1|RAN|RARA|RELA|RORC|RXRA|SIX1|SMARCA4|SRC|SRD5A1|STAT1|STAT3|STAT5B|THRB|VDR|NR1I2|HDAC9|NR1I3|NR1H4|YAP1|UGT1A1
GO Biological Processes	GO:1901699	cellular response to nitrogen compound	660/24156	0.210909	58	-34	-30	ADRB2|AGTR2|AHR|AKT1|AKR1B1|APEX1|APP|BLM|BRCA1|CA2|CASP3|CASP7|CHRM1|CHRM2|CHRM3|CHRM4|CHRM5|CRHBP|CRHR2|DRD1|EGFR|ESRRA|FYN|GLRA1|GLRA2|HRH1|HSPA5|HTR1B|IL1B|INSR|MEN1|MMP2|ABCC1|NFE2L2|NFKB1|OPRM1|PDE4B|PKM|PPARG|MAPK1|MAPK3|MAPK13|PTAFR|PTGS2|PTPN1|RELA|SIX1|SLC6A4|SRC|SRD5A1|STAT1|STAT3|STAT5B|TP53|TRPV1|HDAC9|NR1H4|BACE1
GO Biological Processes	GO:0099537	trans-synaptic signaling	728/24156	0.218182	60	-33	-30	ACHE|ADORA1|ADORA2A|ADRA1A|ADRB2|AKT1|APP|CA2|CA7|CHRM1|CHRM2|CHRM3|CHRM4|CHRM5|CNR1|CRHBP|CRHR2|DRD1|DRD2|DRD3|DRD4|EGFR|FYN|KAT2A|GLRA1|GLRA2|GLRB|GLS|GNAI1|HRH1|HRH2|HTR1A|HTR1B|HTR2A|HTR2B|HTR2C|HTR6|HTR7|IL1B|MAPT|NOS1|NPY2R|OPRK1|OPRM1|PLG|PPP3CA|MAPK1|PTGS2|RARA|RGS4|SLC6A2|SLC6A3|SLC6A4|SRC|STAT3|TACR2|TRPV1|GLRA3|BACE1|CCR2
GO Biological Processes	GO:0003018	vascular process in circulatory system	173/24156	0.127273	35	-33	-29	ADORA1|ADORA2A|ADRA1D|ADRA1B|ADRA1A|ADRA2A|ADRA2B|ADRA2C|ADRB1|ADRB2|ADRB3|AGTR2|AKT1|AVPR1A|BDKRB2|CHRM3|DRD1|EDNRA|EGFR|HMGCR|HRH1|HRH2|HTR1A|HTR1B|HTR2A|HTR2B|HTR7|CXCR2|NOS1|PPARD|PTAFR|PTGS2|SLC6A4|SRC|TACR2
GO Biological Processes	GO:0007268	chemical synaptic transmission	720/24156	0.214545	59	-33	-29	ACHE|ADORA1|ADORA2A|ADRA1A|ADRB2|AKT1|APP|CA2|CA7|CHRM1|CHRM2|CHRM3|CHRM4|CHRM5|CNR1|CRHBP|CRHR2|DRD1|DRD2|DRD3|DRD4|EGFR|FYN|KAT2A|GLRA1|GLRA2|GLRB|GLS|GNAI1|HRH1|HRH2|HTR1A|HTR1B|HTR2A|HTR2B|HTR2C|HTR6|HTR7|IL1B|MAPT|NPY2R|OPRK1|OPRM1|PLG|PPP3CA|MAPK1|PTGS2|RARA|RGS4|SLC6A2|SLC6A3|SLC6A4|SRC|STAT3|TACR2|TRPV1|GLRA3|BACE1|CCR2
GO Biological Processes	GO:0098916	anterograde trans-synaptic signaling	720/24156	0.214545	59	-33	-29	ACHE|ADORA1|ADORA2A|ADRA1A|ADRB2|AKT1|APP|CA2|CA7|CHRM1|CHRM2|CHRM3|CHRM4|CHRM5|CNR1|CRHBP|CRHR2|DRD1|DRD2|DRD3|DRD4|EGFR|FYN|KAT2A|GLRA1|GLRA2|GLRB|GLS|GNAI1|HRH1|HRH2|HTR1A|HTR1B|HTR2A|HTR2B|HTR2C|HTR6|HTR7|IL1B|MAPT|NPY2R|OPRK1|OPRM1|PLG|PPP3CA|MAPK1|PTGS2|RARA|RGS4|SLC6A2|SLC6A3|SLC6A4|SRC|STAT3|TACR2|TRPV1|GLRA3|BACE1|CCR2
GO Biological Processes	GO:0009636	response to toxic substance	533/24156	0.189091	52	-32	-29	ADORA2A|AHR|APEX1|CASP3|ABCC2|CNR1|CRHBP|CYP1A1|CYP2E1|DRD1|DRD2|DRD3|DRD4|FYN|GLRA1|GLRA2|HMGCR|HPGD|HTR1B|IL2|JUN|MAOB|MPO|NFE2L2|NFKB1|OPRD1|OPRM1|POLB|PPARA|PPP3CA|MAPK1|MAPK3|MAPK13|PTGS1|PTGS2|RARA|RELA|RGS4|SLC6A3|SLC6A4|SRC|SRD5A1|STAT1|STAT3|TXNRD1|TRPA1|ABCG2|GSTO1|HDAC9|SIGMAR1|RGS19|UGT1A1
GO Biological Processes	GO:0050880	regulation of blood vessel size	141/24156	0.116364	32	-32	-29	ADORA1|ADORA2A|ADRA1D|ADRA1B|ADRA1A|ADRA2A|ADRA2B|ADRA2C|ADRB1|ADRB2|ADRB3|AGTR2|AKT1|AVPR1A|BDKRB2|CHRM3|DRD1|EDNRA|EGFR|HMGCR|HRH1|HRH2|HTR1A|HTR1B|HTR2A|HTR2B|HTR7|NOS1|PPARD|PTAFR|PTGS2|SLC6A4
GO Biological Processes	GO:0035296	regulation of tube diameter	141/24156	0.116364	32	-32	-29	ADORA1|ADORA2A|ADRA1D|ADRA1B|ADRA1A|ADRA2A|ADRA2B|ADRA2C|ADRB1|ADRB2|ADRB3|AGTR2|AKT1|AVPR1A|BDKRB2|CHRM3|DRD1|EDNRA|EGFR|HMGCR|HRH1|HRH2|HTR1A|HTR1B|HTR2A|HTR2B|HTR7|NOS1|PPARD|PTAFR|PTGS2|SLC6A4
GO Biological Processes	GO:0097746	regulation of blood vessel diameter	141/24156	0.116364	32	-32	-29	ADORA1|ADORA2A|ADRA1D|ADRA1B|ADRA1A|ADRA2A|ADRA2B|ADRA2C|ADRB1|ADRB2|ADRB3|AGTR2|AKT1|AVPR1A|BDKRB2|CHRM3|DRD1|EDNRA|EGFR|HMGCR|HRH1|HRH2|HTR1A|HTR1B|HTR2A|HTR2B|HTR7|NOS1|PPARD|PTAFR|PTGS2|SLC6A4
GO Biological Processes	GO:0035150	regulation of tube size	142/24156	0.116364	32	-32	-28	ADORA1|ADORA2A|ADRA1D|ADRA1B|ADRA1A|ADRA2A|ADRA2B|ADRA2C|ADRB1|ADRB2|ADRB3|AGTR2|AKT1|AVPR1A|BDKRB2|CHRM3|DRD1|EDNRA|EGFR|HMGCR|HRH1|HRH2|HTR1A|HTR1B|HTR2A|HTR2B|HTR7|NOS1|PPARD|PTAFR|PTGS2|SLC6A4
GO Biological Processes	GO:0071417	cellular response to organonitrogen compound	597/24156	0.192727	53	-31	-28	ADRB2|AGTR2|AHR|AKT1|AKR1B1|APEX1|APP|BLM|BRCA1|CA2|CASP3|CASP7|CRHBP|CRHR2|DRD1|EGFR|ESRRA|FYN|GLRA1|GLRA2|HRH1|HSPA5|HTR1B|IL1B|INSR|MEN1|MMP2|ABCC1|NFE2L2|NFKB1|OPRM1|PDE4B|PKM|PPARG|MAPK1|MAPK3|MAPK13|PTAFR|PTGS2|PTPN1|RELA|SIX1|SLC6A4|SRC|SRD5A1|STAT1|STAT3|STAT5B|TP53|TRPV1|HDAC9|NR1H4|BACE1
GO Biological Processes	GO:0019932	second-messenger-mediated signaling	445/24156	0.163636	45	-29	-25	ADORA2A|ADRA1D|ADRA1B|ADRA1A|ADRA2A|ADRA2B|ADRA2C|ADRB1|ADRB2|ADRB3|AGTR2|AHR|AVPR1A|CALCR|CCR4|CCR5|DRD1|DRD2|DRD3|EGFR|NR5A1|GNAI1|GNAS|HTT|HRH1|HTR2B|HTR2C|CXCR1|CXCR2|MAPT|MC3R|MC4R|MC5R|NOS1|NOS2|NPY2R|OPRM1|PPP3CA|PRKCA|PTH1R|PTPRC|TNFSF11|PDE5A|GSTO1|CCR2
GO Biological Processes	GO:0035690	cellular response to drug	376/24156	0.152727	42	-28	-25	AGTR2|AHR|APEX1|BLM|BRCA1|CHRM1|CHRM2|CHRM3|CHRM4|CHRM5|ABCC2|CRHBP|DRD1|EGFR|FYN|GLRA1|GLRA2|GNAI1|NR3C1|HSPA5|HTR1B|IL1B|KCNH2|KMT2A|NFE2L2|NFKB1|NOS2|OPRM1|PDE4B|PPP3CA|MAPK1|MAPK3|MAPK13|PTAFR|PTGS2|RELA|SRC|SRD5A1|TP53|TRPV1|SIGMAR1|UGT1A1
GO Biological Processes	GO:0046677	response to antibiotic	331/24156	0.145455	40	-28	-25	AHR|APEX1|CASP3|CCR4|CNR1|CRHBP|CYP1A1|CYP2E1|DRD2|DRD3|DRD4|FYN|GLRA1|GLRA2|GNAI1|HMGCR|HPGD|HSPA5|HTR1B|HYAL1|IL2|JUN|MAOB|NFE2L2|OPRM1|POLB|MAPK13|RARA|RELA|RGS4|SLC6A3|SRC|SRD5A1|STAT1|STAT3|TP53|TRPA1|SIGMAR1|RGS19|UGT1A1
GO Biological Processes	GO:0010817	regulation of hormone levels	537/24156	0.174545	48	-28	-25	ACHE|ADORA1|ADORA2A|ADRA2A|ADRA2B|ADRA2C|AGTR2|ALDH1A1|AKR1B1|CCKAR|ABCC2|CNR1|CRHBP|CTSG|CYP1A1|CYP1A2|CYP2C9|CYP2D6|CYP3A4|CYP19A1|DRD2|EGFR|ESR1|NR5A1|GNAS|HMGCR|HSD11B1|HSD11B2|HTR1A|HTR2C|IL1B|SMAD2|MC4R|NFKB1|NOS2|PPARD|PPP3CA|PRKCA|SRD5A1|STAT5B|TACR2|TTR|VDR|TNFSF11|NR1H4|UGT1A8|UGT1A1|UGT1A3
GO Biological Processes	GO:0048545	response to steroid hormone	386/24156	0.152727	42	-28	-25	AGTR2|NR0B1|AR|AVPR1A|BRCA1|CA2|CALCR|CASP3|CBFB|ABCC2|EGFR|ESR1|ESR2|ESRRA|NR5A1|GBA|NR3C1|HSD11B2|HTR1B|MAOB|NPC1|PGR|PPARA|PPARD|PPARG|PTAFR|PTGS2|RAN|RARA|RELA|RORC|RXRA|SMARCA4|SRC|SRD5A1|THRB|VDR|NR1I2|NR1I3|NR1H4|YAP1|UGT1A1
GO Biological Processes	GO:0071396	cellular response to lipid	616/24156	0.181818	50	-27	-24	AGTR2|NR0B1|AHR|AKT1|AR|BRCA1|CASP1|CBFB|CCR5|ABCC2|CRHBP|MAPK14|CTSG|EGFR|ESR1|ESR2|ESRRA|NR5A1|GNAI1|NR3C1|HMGB1|IL1B|NFKB1|NOS2|NPC1|PDE4B|PGR|PPARA|PPARD|PPARG|PRKCA|MAPK1|MAPK3|PTAFR|RAN|RARA|RELA|RORC|RXRA|SLC6A4|SMARCA4|SRC|SRD5A1|THRB|VDR|NR1I2|NR1I3|NR1H4|YAP1|UGT1A1
GO Biological Processes	GO:0098771	inorganic ion homeostasis	759/24156	0.196364	54	-27	-24	ADORA1|ADORA2A|ADRA1D|ADRA1B|ADRA1A|AGTR2|APP|AVPR1A|BDKRB2|CA2|CA7|CA12|CALCR|CCR4|CCR5|ABCC2|CNR1|DRD1|DRD2|DRD3|DRD4|EDNRA|EGFR|ELANE|ESR1|FYN|HTT|HMGB1|HTR1B|HTR2A|HTR2B|HTR2C|IL2|CXCR1|CXCR2|KCNH2|LCK|SMAD3|MC3R|NOS1|NPY2R|MAPK1|MAPK3|PTH1R|PTPRC|TACR1|VDR|TRPV1|TNFSF11|TRPA1|ABCG2|GSTO1|CYSLTR1|CCR2
GO Biological Processes	GO:0097756	negative regulation of blood vessel diameter	85/24156	0.0872727	24	-26	-23	ADORA1|ADRA1D|ADRA1B|ADRA1A|ADRA2A|ADRA2B|ADRA2C|AKT1|AVPR1A|BDKRB2|CHRM3|EDNRA|EGFR|HMGCR|HRH1|HRH2|HTR1A|HTR1B|HTR2A|HTR2B|HTR7|PTAFR|PTGS2|SLC6A4
GO Biological Processes	GO:0055080	cation homeostasis	748/24156	0.189091	52	-25	-22	ADORA1|ADORA2A|ADRA1D|ADRA1B|ADRA1A|AGTR2|APP|AVPR1A|BDKRB2|CA2|CA7|CALCR|CCR4|CCR5|CNR1|DRD1|DRD2|DRD3|DRD4|EDNRA|EGFR|ELANE|ESR1|FYN|HTT|HMGB1|HTR1B|HTR2A|HTR2B|HTR2C|IL2|CXCR1|CXCR2|KCNH2|LCK|SMAD3|MC3R|NOS1|NPY2R|MAPK1|MAPK3|PTH1R|PTPRC|TACR1|VDR|TRPV1|TNFSF11|TRPA1|ABCG2|GSTO1|CYSLTR1|CCR2
GO Biological Processes	GO:0032496	response to lipopolysaccharide	338/24156	0.134545	37	-25	-22	AKT1|CASP1|CASP3|CCR5|ABCC2|CNR1|MAPK14|CTSG|CYP1A1|CYP1A2|ELANE|HMGB1|HPGD|IL1B|JUN|MAOB|MPO|NFKB1|NFKB2|NOS1|NOS2|OPRM1|PDE4B|PPARD|PRKCA|MAPK1|MAPK3|PTAFR|PTGS2|RARA|RELA|SRC|VDR|NR1I2|NR1I3|NR1H4|UGT1A1
GO Biological Processes	GO:0042310	vasoconstriction	77/24156	0.08	22	-24	-21	ADRA1D|ADRA1B|ADRA1A|ADRA2A|ADRA2B|ADRA2C|AKT1|AVPR1A|BDKRB2|CHRM3|EDNRA|EGFR|HRH1|HRH2|HTR1A|HTR1B|HTR2A|HTR2B|HTR7|PTAFR|PTGS2|SLC6A4
GO Biological Processes	GO:0055074	calcium ion homeostasis	484/24156	0.152727	42	-24	-21	ADORA1|ADRA1D|ADRA1B|ADRA1A|APP|AVPR1A|BDKRB2|CALCR|CCR4|CCR5|CNR1|DRD1|DRD2|DRD3|DRD4|EDNRA|ELANE|ESR1|FYN|HTT|HMGB1|HTR1B|HTR2A|HTR2B|HTR2C|IL2|CXCR1|CXCR2|LCK|SMAD3|NOS1|NPY2R|PTH1R|PTPRC|TACR1|VDR|TRPV1|TNFSF11|TRPA1|GSTO1|CYSLTR1|CCR2
GO Biological Processes	GO:0008217	regulation of blood pressure	183/24156	0.105455	29	-24	-21	ADORA1|ADRA1D|ADRA1B|ADRA1A|ADRA2B|ADRB1|ADRB2|ADRB3|AGTR2|AR|AVPR1A|CNR1|CTSG|DRD2|DRD3|EDNRA|HSD11B2|SMAD3|MC3R|NOS1|NOS2|NPY1R|PPARA|PPARG|PTAFR|PTGS1|PTGS2|TRPV1|ERAP1
GO Biological Processes	GO:0055065	metal ion homeostasis	668/24156	0.174545	48	-24	-21	ADORA1|ADORA2A|ADRA1D|ADRA1B|ADRA1A|AGTR2|APP|AVPR1A|BDKRB2|CALCR|CCR4|CCR5|CNR1|DRD1|DRD2|DRD3|DRD4|EDNRA|EGFR|ELANE|ESR1|FYN|HTT|HMGB1|HTR1B|HTR2A|HTR2B|HTR2C|IL2|CXCR1|CXCR2|KCNH2|LCK|SMAD3|MC3R|NOS1|NPY2R|PTH1R|PTPRC|TACR1|VDR|TRPV1|TNFSF11|TRPA1|ABCG2|GSTO1|CYSLTR1|CCR2
GO Biological Processes	GO:0002237	response to molecule of bacterial origin	358/24156	0.134545	37	-24	-21	AKT1|CASP1|CASP3|CCR5|ABCC2|CNR1|MAPK14|CTSG|CYP1A1|CYP1A2|ELANE|HMGB1|HPGD|IL1B|JUN|MAOB|MPO|NFKB1|NFKB2|NOS1|NOS2|OPRM1|PDE4B|PPARD|PRKCA|MAPK1|MAPK3|PTAFR|PTGS2|RARA|RELA|SRC|VDR|NR1I2|NR1I3|NR1H4|UGT1A1
GO Biological Processes	GO:1903530	regulation of secretion by cell	777/24156	0.185455	51	-24	-21	ACHE|ADORA1|ADORA2A|ADRA1A|ADRA2A|ADRA2B|ADRA2C|AGTR2|AVPR1A|CASP1|CCKAR|CHRM2|CNR1|CRHBP|MAPK14|CYP19A1|DRD1|DRD2|DRD3|DRD4|EGFR|GAPDH|GNAS|HMGB1|HMGCR|HTR1A|HTR1B|HTR2A|HTR2B|HTR2C|IL1B|IL2|MAOB|NOS2|NPY2R|OPRM1|PPARD|PPP3CA|PRKCA|MAPK3|MAPK11|PTAFR|SLC6A4|SRC|TACR2|TNFSF11|RAB9A|HDAC9|NR1H4|BACE1|CCR2
GO Biological Processes	GO:0072507	divalent inorganic cation homeostasis	526/24156	0.156364	43	-24	-21	ADORA1|ADRA1D|ADRA1B|ADRA1A|APP|AVPR1A|BDKRB2|CALCR|CCR4|CCR5|CNR1|DRD1|DRD2|DRD3|DRD4|EDNRA|EGFR|ELANE|ESR1|FYN|HTT|HMGB1|HTR1B|HTR2A|HTR2B|HTR2C|IL2|CXCR1|CXCR2|LCK|SMAD3|NOS1|NPY2R|PTH1R|PTPRC|TACR1|VDR|TRPV1|TNFSF11|TRPA1|GSTO1|CYSLTR1|CCR2
GO Biological Processes	GO:0006874	cellular calcium ion homeostasis	472/24156	0.149091	41	-24	-21	ADORA1|ADRA1D|ADRA1B|ADRA1A|APP|AVPR1A|BDKRB2|CALCR|CCR4|CCR5|CNR1|DRD1|DRD2|DRD3|DRD4|EDNRA|ELANE|ESR1|FYN|HTT|HMGB1|HTR1B|HTR2A|HTR2B|HTR2C|IL2|CXCR1|CXCR2|LCK|SMAD3|NOS1|NPY2R|PTH1R|PTPRC|TACR1|VDR|TRPV1|TRPA1|GSTO1|CYSLTR1|CCR2
GO Biological Processes	GO:0006873	cellular ion homeostasis	685/24156	0.174545	48	-23	-21	ADORA1|ADRA1D|ADRA1B|ADRA1A|AGTR2|APP|AVPR1A|BDKRB2|CA2|CA7|CALCR|CCR4|CCR5|ABCC2|CNR1|DRD1|DRD2|DRD3|DRD4|EDNRA|ELANE|ESR1|FYN|HTT|HMGB1|HTR1B|HTR2A|HTR2B|HTR2C|IL2|CXCR1|CXCR2|LCK|SMAD3|NOS1|NPY2R|MAPK1|MAPK3|PTH1R|PTPRC|TACR1|VDR|TRPV1|TRPA1|ABCG2|GSTO1|CYSLTR1|CCR2
GO Biological Processes	GO:0051480	regulation of cytosolic calcium ion concentration	373/24156	0.134545	37	-23	-20	ADORA1|ADRA1D|ADRA1B|ADRA1A|AVPR1A|BDKRB2|CALCR|CCR4|CCR5|CNR1|DRD1|DRD2|DRD3|EDNRA|ESR1|FYN|HTT|HMGB1|HTR1B|HTR2A|HTR2B|HTR2C|IL2|CXCR1|CXCR2|LCK|SMAD3|NOS1|NPY2R|PTH1R|PTPRC|TACR1|TRPV1|TRPA1|GSTO1|CYSLTR1|CCR2
GO Biological Processes	GO:1903522	regulation of blood circulation	301/24156	0.123636	34	-23	-20	ADORA1|ADORA3|ADRA1D|ADRA1B|ADRA1A|ADRA2A|ADRA2B|ADRA2C|ADRB1|AGTR2|AKT1|AVPR1A|BDKRB2|CHRM2|CHRM3|DRD2|EGFR|GAA|GNAO1|HRH1|HRH2|HTR2A|IL2|KCNH2|MC3R|NOS1|PDE4B|PTAFR|PTGS2|RGS4|THRB|TRPV1|PDE5A|GSTO1
GO Biological Processes	GO:0097305	response to alcohol	239/24156	0.112727	31	-23	-20	AHR|AKT1|AVPR1A|BLM|BRCA1|CCR5|CNR1|CRHBP|CYP2E1|DRD2|DRD3|DRD4|FYN|GLRA1|GLRA2|GNAI1|HMGCR|HPGD|HTR1B|IL2|SMAD2|MAOB|OPRM1|POLB|PPARG|RARA|RGS4|SLC6A3|STAT3|RGS19|UGT1A1
GO Biological Processes	GO:0030003	cellular cation homeostasis	672/24156	0.170909	47	-23	-20	ADORA1|ADRA1D|ADRA1B|ADRA1A|AGTR2|APP|AVPR1A|BDKRB2|CA2|CA7|CALCR|CCR4|CCR5|CNR1|DRD1|DRD2|DRD3|DRD4|EDNRA|ELANE|ESR1|FYN|HTT|HMGB1|HTR1B|HTR2A|HTR2B|HTR2C|IL2|CXCR1|CXCR2|LCK|SMAD3|NOS1|NPY2R|MAPK1|MAPK3|PTH1R|PTPRC|TACR1|VDR|TRPV1|TRPA1|ABCG2|GSTO1|CYSLTR1|CCR2
GO Biological Processes	GO:0008202	steroid metabolic process	332/24156	0.127273	35	-23	-20	NR0B1|AKR1B1|APP|CYP1A1|CYP1A2|CYP2A6|CYP2C19|CYP2C9|CYP2D6|CYP2E1|CYP3A4|CYP19A1|ESR1|NR5A1|GBA|HMGCR|HSD11B1|HSD11B2|IL1B|KPNB1|NFKB1|NPC1|PPARD|RAN|RORC|RXRA|SMPD1|SRD5A1|STAT5B|UGT2B15|VDR|NR1I2|NR1H4|UGT1A8|UGT1A1
GO Biological Processes	GO:0015850	organic hydroxy compound transport	264/24156	0.116364	32	-23	-20	ADORA2A|ADRA2A|ADRA2B|ADRA2C|AGTR2|CHRM5|ABCC2|CNR1|CYP19A1|DRD1|DRD2|DRD3|DRD4|HTR1A|HTR1B|HTR2A|MAOB|NFKB1|NOS1|NPC1|NPY2R|PPARG|RXRA|SLC6A2|SLC6A3|SLC6A4|SLCO1A2|ABCC3|NR1H4|SLCO1B1|SLCO2B1|SLCO1B3
GO Biological Processes	GO:0060359	response to ammonium ion	133/24156	0.0909091	25	-23	-20	CASP3|CASP7|CHRM1|CHRM2|CHRM3|CHRM4|CHRM5|CNR1|CRHBP|DRD1|DRD2|DRD3|DRD4|HRH1|HSPA5|HTR1B|HTR2A|OPRM1|MAPK1|MAPK3|PTAFR|RELA|RGS4|SLC6A3|SMPD1
GO Biological Processes	GO:0071383	cellular response to steroid hormone stimulus	249/24156	0.112727	31	-22	-20	AGTR2|NR0B1|AR|BRCA1|CBFB|ABCC2|EGFR|ESR1|ESR2|ESRRA|NR5A1|NR3C1|NPC1|PGR|PPARA|PPARD|PPARG|RAN|RARA|RORC|RXRA|SMARCA4|SRC|SRD5A1|THRB|VDR|NR1I2|NR1I3|NR1H4|YAP1|UGT1A1
GO Biological Processes	GO:0009991	response to extracellular stimulus	534/24156	0.152727	42	-22	-20	ADRB1|ADRB2|AKT1|AVPR1A|CNR1|CYP1A1|EGFR|FYN|GBA|KAT2A|HMGCR|HSD11B2|HSPA5|HTR2C|IL1B|JUN|MC4R|MPO|NFE2L2|OPRM1|PKM|PPARA|PPARD|PPARG|MAPK1|MAPK3|PTGS2|PTPRC|RARA|RELA|SLC6A4|SORD|SRC|SRD5A1|STAT1|TP53|TYR|VDR|TRPV1|NR1H4|EHMT2|UGT1A1
GO Biological Processes	GO:1901652	response to peptide	534/24156	0.152727	42	-22	-20	ADRB2|AGTR2|AKT1|AKR1B1|APEX1|APP|CA2|CALCR|ABCC2|CRHBP|CRHR2|MAPK14|ESRRA|NR5A1|FYN|GNAI1|HSD11B2|IL1B|INSR|MC4R|MEN1|MMP2|MMP9|ABCC1|NFE2L2|NFKB1|PKM|PPARA|PPARG|PTGS2|PTPN1|RELA|SRC|SRD5A1|STAT1|STAT3|STAT5B|TP53|TRPV1|HDAC9|NR1H4|BACE1
GO Biological Processes	GO:0072503	cellular divalent inorganic cation homeostasis	507/24156	0.149091	41	-22	-20	ADORA1|ADRA1D|ADRA1B|ADRA1A|APP|AVPR1A|BDKRB2|CALCR|CCR4|CCR5|CNR1|DRD1|DRD2|DRD3|DRD4|EDNRA|ELANE|ESR1|FYN|HTT|HMGB1|HTR1B|HTR2A|HTR2B|HTR2C|IL2|CXCR1|CXCR2|LCK|SMAD3|NOS1|NPY2R|PTH1R|PTPRC|TACR1|VDR|TRPV1|TRPA1|GSTO1|CYSLTR1|CCR2
GO Biological Processes	GO:0003012	muscle system process	462/24156	0.141818	39	-22	-19	ADORA1|ADRA1D|ADRA1B|ADRA1A|ADRA2A|ADRA2B|ADRA2C|ADRB2|AGTR2|BDKRB2|CHRM2|CHRM3|DRD1|DRD2|EDNRA|GAA|GLRA1|GNAO1|HTR2A|HTR2B|HTR7|IL1B|KCNH2|LMNA|SMAD3|NOS1|NPY2R|PDE4B|PPARA|PPP3CA|PRKCA|PTAFR|PTGS2|RGS4|TACR2|TACR1|TRPV1|PDE5A|GSTO1
GO Biological Processes	GO:0006939	smooth muscle contraction	112/24156	0.0836364	23	-22	-19	ADORA1|ADRA1D|ADRA1B|ADRA1A|ADRA2A|ADRA2B|ADRA2C|ADRB2|BDKRB2|CHRM2|CHRM3|DRD1|DRD2|EDNRA|HTR2A|HTR2B|HTR7|NPY2R|PTAFR|PTGS2|TACR2|TACR1|TRPV1
GO Biological Processes	GO:0071466	cellular response to xenobiotic stimulus	179/24156	0.0981818	27	-22	-19	AGTR2|AHR|ABCC2|CRHBP|CRYZ|CYP1A1|CYP1A2|CYP2A6|CYP2C19|CYP2C9|CYP2D6|CYP2E1|CYP3A4|EGFR|NR3C1|OPRM1|PTGS1|RORC|SRD5A1|STAT5B|UGT2B15|NR1I2|GSTO1|UGT1A10|UGT1A8|UGT1A1|UGT1A3
GO Biological Processes	GO:0007204	positive regulation of cytosolic calcium ion concentration	332/24156	0.123636	34	-22	-19	ADRA1D|ADRA1B|ADRA1A|AVPR1A|BDKRB2|CALCR|CCR4|CCR5|CNR1|DRD1|DRD2|DRD3|EDNRA|ESR1|FYN|HTT|HMGB1|HTR2A|HTR2B|HTR2C|IL2|CXCR1|CXCR2|LCK|NOS1|NPY2R|PTH1R|PTPRC|TACR1|TRPV1|TRPA1|GSTO1|CYSLTR1|CCR2
GO Biological Processes	GO:0031667	response to nutrient levels	501/24156	0.145455	40	-22	-19	ADRB1|ADRB2|AKT1|CNR1|CYP1A1|EGFR|FYN|GBA|KAT2A|HMGCR|HSD11B2|HSPA5|HTR2C|IL1B|JUN|MC4R|MPO|NFE2L2|OPRM1|PKM|PPARA|PPARD|PPARG|MAPK1|MAPK3|PTGS2|RARA|RELA|SLC6A4|SORD|SRC|SRD5A1|STAT1|TP53|TYR|VDR|TRPV1|NR1H4|EHMT2|UGT1A1
GO Biological Processes	GO:0006875	cellular metal ion homeostasis	596/24156	0.156364	43	-21	-19	ADORA1|ADRA1D|ADRA1B|ADRA1A|AGTR2|APP|AVPR1A|BDKRB2|CALCR|CCR4|CCR5|CNR1|DRD1|DRD2|DRD3|DRD4|EDNRA|ELANE|ESR1|FYN|HTT|HMGB1|HTR1B|HTR2A|HTR2B|HTR2C|IL2|CXCR1|CXCR2|LCK|SMAD3|NOS1|NPY2R|PTH1R|PTPRC|TACR1|VDR|TRPV1|TRPA1|ABCG2|GSTO1|CYSLTR1|CCR2
GO Biological Processes	GO:0050804	modulation of chemical synaptic transmission	450/24156	0.138182	38	-21	-19	ACHE|ADORA1|ADORA2A|ADRA1A|ADRB2|APP|CA2|CA7|CHRM2|CNR1|CRHR2|DRD1|DRD2|DRD3|DRD4|EGFR|FYN|KAT2A|GNAI1|HRH1|HRH2|HTR1B|HTR2A|IL1B|MAPT|NPY2R|PLG|PPP3CA|MAPK1|PTGS2|RARA|RGS4|SLC6A4|SRC|STAT3|TACR2|BACE1|CCR2
GO Biological Processes	GO:0099177	regulation of trans-synaptic signaling	451/24156	0.138182	38	-21	-19	ACHE|ADORA1|ADORA2A|ADRA1A|ADRB2|APP|CA2|CA7|CHRM2|CNR1|CRHR2|DRD1|DRD2|DRD3|DRD4|EGFR|FYN|KAT2A|GNAI1|HRH1|HRH2|HTR1B|HTR2A|IL1B|MAPT|NPY2R|PLG|PPP3CA|MAPK1|PTGS2|RARA|RGS4|SLC6A4|SRC|STAT3|TACR2|BACE1|CCR2
GO Biological Processes	GO:1901615	organic hydroxy compound metabolic process	548/24156	0.149091	41	-21	-18	AGTR2|ALDH1A1|ALDH2|AKR1B1|APP|CYP1A1|CYP1A2|CYP2C9|CYP2D6|CYP2E1|CYP3A4|CYP19A1|DRD1|DRD2|DRD3|DRD4|GBA|HMGCR|HRH1|HTR1A|IL1B|IMPA1|KPNB1|MAOA|MAOB|NFKB1|NPC1|PPARD|PTAFR|PTH1R|RAN|RXRA|SLC6A3|SMPD1|SORD|SRD5A1|TP53|TTR|TYR|VDR|NR1H4
GO Biological Processes	GO:0007200	phospholipase C-activating G protein-coupled receptor signaling pathway	110/24156	0.08	22	-21	-18	ADRA1D|ADRA1B|ADRA1A|ADRA2A|CCKAR|CHRM1|CHRM2|DRD1|DRD2|DRD3|ESR1|HRH1|HTR2A|HTR2B|HTR2C|CXCR2|MC3R|OPRD1|OPRK1|OPRM1|PTH1R|TACR1
GO Biological Processes	GO:0044706	multi-multicellular organism process	224/24156	0.101818	28	-20	-18	ADRA2B|ADRA2C|AKT1|AKR1B1|AR|AVPR1A|ABCC2|CNR1|CRHBP|CYP1A1|ESR1|HPGD|HSD11B2|IL1B|MEN1|MMP2|MMP9|PGR|PPARD|MAPK1|MAPK3|PTAFR|PTGS2|RARA|RXRA|SLC6A4|STAT5B|VDR
GO Biological Processes	GO:0098664	G protein-coupled serotonin receptor signaling pathway	34/24156	0.0545455	15	-20	-17	CHRM1|CHRM2|CHRM3|CHRM4|CHRM5|DRD4|HRH1|HRH2|HTR1A|HTR1B|HTR2A|HTR2B|HTR2C|HTR6|HTR7
GO Biological Processes	GO:0015844	monoamine transport	88/24156	0.0727273	20	-20	-17	ADORA2A|ADRA2A|ADRA2B|ADRA2C|AGTR2|CHRM5|CNR1|DRD1|DRD2|DRD3|DRD4|HTR1A|HTR1B|HTR2A|MAOB|NOS1|NPY2R|SLC6A2|SLC6A3|SLC6A4
GO Biological Processes	GO:0019935	cyclic-nucleotide-mediated signaling	214/24156	0.0981818	27	-20	-17	ADORA2A|ADRA1D|ADRA1B|ADRA1A|ADRA2A|ADRA2B|ADRA2C|ADRB1|ADRB2|ADRB3|AHR|CALCR|DRD1|DRD2|DRD3|GNAI1|GNAS|HTR2B|HTR2C|MC3R|MC4R|MC5R|NOS1|NPY2R|OPRM1|PRKCA|PTH1R
GO Biological Processes	GO:0006820	anion transport	637/24156	0.152727	42	-20	-17	ADORA1|ADORA2A|AGTR2|AKT1|AVPR1A|BDKRB2|CA1|CA2|CA4|CA7|CA9|CA12|ABCC2|DRD2|DRD3|DRD4|GLRA1|GLRA2|GLRB|GLS|HTR1B|IL1B|ABCC1|NOS2|PPARA|PPARD|PPARG|PTAFR|RGS4|RXRA|SLCO1A2|TRPV1|GLRA3|TNFSF11|ABCC3|ABCG2|NR1H4|ABCC4|SLCO1B1|SLCO2B1|SLCO1B3|RACGAP1
GO Biological Processes	GO:0007210	serotonin receptor signaling pathway	39/24156	0.0545455	15	-19	-16	CHRM1|CHRM2|CHRM3|CHRM4|CHRM5|DRD4|HRH1|HRH2|HTR1A|HTR1B|HTR2A|HTR2B|HTR2C|HTR6|HTR7
GO Biological Processes	GO:0019933	cAMP-mediated signaling	186/24156	0.0909091	25	-19	-16	ADORA2A|ADRA1D|ADRA1B|ADRA1A|ADRA2A|ADRA2B|ADRA2C|ADRB1|ADRB2|ADRB3|AHR|CALCR|DRD1|DRD2|DRD3|GNAI1|GNAS|MC3R|MC4R|MC5R|NOS1|NPY2R|OPRM1|PRKCA|PTH1R
GO Biological Processes	GO:0043401	steroid hormone mediated signaling pathway	182/24156	0.0909091	25	-19	-17	NR0B1|AR|BRCA1|CBFB|ESR1|ESR2|ESRRA|NR5A1|NR3C1|PGR|PPARA|PPARD|PPARG|RAN|RARA|RORC|RXRA|SMARCA4|SRC|THRB|VDR|NR1I2|NR1I3|NR1H4|YAP1
GO Biological Processes	GO:0048511	rhythmic process	299/24156	0.109091	30	-19	-16	ADORA1|ADORA2A|ADRB1|AHR|CASP3|DRD2|DRD3|DRD4|EGFR|ESR1|NR5A1|HSPA5|HTR7|JUN|MC3R|KMT2A|NFKB2|NOS2|NPY2R|OPRM1|PGR|PPARA|PPARG|RORC|SLC6A4|SRC|SRD5A1|STAT5B|TP53|USP2
GO Biological Processes	GO:0001505	regulation of neurotransmitter levels	355/24156	0.112727	31	-18	-15	ACHE|ADORA2A|ADRA1A|AGTR2|AKT1|CHRM2|CNR1|DRD1|DRD2|DRD3|DRD4|GLA|HTR1A|HTR1B|HTR2A|IL1B|INSR|SMAD3|MAOA|MAOB|NOS1|NOS2|PTGS2|RGS4|SLC6A2|SLC6A3|SLC6A4|SRD5A1|TACR2|TRPV1|BACE1
GO Biological Processes	GO:0007193	adenylate cyclase-inhibiting G protein-coupled receptor signaling pathway	89/24156	0.0690909	19	-18	-16	ADORA1|ADRA2A|CHRM1|CHRM2|CHRM3|CHRM4|CHRM5|DRD2|DRD3|DRD4|EDNRA|GNAI1|HTR1A|HTR1B|NPY1R|NPY2R|OPRD1|OPRK1|OPRM1
GO Biological Processes	GO:0051937	catecholamine transport	75/24156	0.0581818	16	-16	-13	ADORA2A|ADRA2A|ADRA2B|ADRA2C|AGTR2|CHRM5|CNR1|DRD1|DRD2|DRD3|DRD4|HTR1B|HTR2A|NPY2R|SLC6A2|SLC6A3
GO Biological Processes	GO:0051588	regulation of neurotransmitter transport	145/24156	0.0690909	19	-14	-12	ADORA2A|ADRA1A|CHRM2|CNR1|DRD1|DRD2|DRD3|DRD4|HTR1A|HTR1B|HTR2A|HTR2C|MAOB|NOS1|RGS4|SLC6A4|TACR2|TNFSF11|BACE1
GO Biological Processes	GO:0050890	cognition	297/24156	0.0909091	25	-14	-12	ADORA1|APP|CASP3|CHRM1|CNR1|CRHBP|DRD1|DRD2|DRD3|EGFR|FEN1|FYN|KAT2A|HTT|HMGCR|HRH1|HRH2|HTR2A|INSR|JUN|MAPT|MAPK1|PTGS2|SLC6A4|TACR2
GO Biological Processes	GO:0007611	learning or memory	258/24156	0.0836364	23	-14	-11	APP|CASP3|CNR1|CRHBP|DRD1|DRD2|DRD3|EGFR|FEN1|FYN|KAT2A|HTT|HMGCR|HRH1|HRH2|HTR2A|INSR|JUN|MAPT|MAPK1|PTGS2|SLC6A4|TACR2
GO Biological Processes	GO:0060078	regulation of postsynaptic membrane potential	147/24156	0.0654545	18	-13	-11	ADORA1|ADORA2A|ADRB1|ADRB2|AKT1|APP|CHRM1|DRD2|DRD4|GLRA1|GLRA2|GLRB|NPY2R|OPRM1|PPP3CA|RGS4|TRPV1|GLRA3
GO Biological Processes	GO:0099565	chemical synaptic transmission, postsynaptic	112/24156	0.0581818	16	-13	-10	ADORA1|ADORA2A|ADRB2|AKT1|APP|DRD2|DRD4|GLRA1|GLRA2|GLRB|NPY2R|OPRM1|PPP3CA|RGS4|TRPV1|GLRA3
GO Biological Processes	GO:0050806	positive regulation of synaptic transmission	164/24156	0.0654545	18	-12	-10	ADORA1|ADORA2A|ADRA1A|ADRB2|APP|CA2|CA7|CNR1|CRHR2|DRD1|DRD2|DRD4|EGFR|MAPK1|PTGS2|RGS4|TACR2|CCR2
GO Biological Processes	GO:0060079	excitatory postsynaptic potential	103/24156	0.0545455	15	-12	-9.9	ADORA1|ADORA2A|ADRB2|AKT1|APP|DRD2|GLRA1|GLRA2|GLRB|NPY2R|OPRM1|PPP3CA|RGS4|TRPV1|GLRA3
GO Biological Processes	GO:0050795	regulation of behavior	70/24156	0.0472727	13	-12	-9.8	ADORA1|ADORA2A|ADRB1|CNR1|DRD2|DRD3|HTR1A|HTR1B|HTR2B|MC3R|MC4R|NPY2R|STAT3
GO Biological Processes	GO:0001963	synaptic transmission, dopaminergic	32/24156	0.0363636	10	-12	-9.6	ADORA2A|CRHBP|DRD1|DRD2|DRD3|DRD4|PTGS2|SLC6A2|SLC6A3|SLC6A4
GO Biological Processes	GO:0042133	neurotransmitter metabolic process	152/24156	0.0618182	17	-12	-9.6	ACHE|AGTR2|AKT1|GLA|HTR1A|IL1B|INSR|SMAD3|MAOA|MAOB|NOS1|NOS2|PTGS2|SLC6A3|SLC6A4|SRD5A1|TRPV1
GO Biological Processes	GO:0050805	negative regulation of synaptic transmission	80/24156	0.0472727	13	-11	-9.1	ACHE|ADORA1|DRD1|DRD2|DRD3|GNAI1|HTR1B|HTR2A|IL1B|MAPT|NPY2R|PTGS2|SLC6A4
GO Biological Processes	GO:0006836	neurotransmitter transport	273/24156	0.0763636	21	-11	-9	ADORA2A|ADRA1A|CHRM2|CNR1|DRD1|DRD2|DRD3|DRD4|HTR1A|HTR1B|HTR2A|HTR2C|MAOB|NOS1|RGS4|SLC6A2|SLC6A3|SLC6A4|TACR2|TNFSF11|BACE1
GO Biological Processes	GO:0015872	dopamine transport	52/24156	0.04	11	-11	-8.8	CHRM5|CNR1|DRD1|DRD2|DRD3|DRD4|HTR1B|HTR2A|NPY2R|SLC6A2|SLC6A3
GO Biological Processes	GO:0051966	regulation of synaptic transmission, glutamatergic	72/24156	0.0436364	12	-11	-8.4	ADORA1|ADORA2A|CNR1|DRD1|DRD2|DRD3|EGFR|HTR1B|HTR2A|NPY2R|PTGS2|CCR2
GO Biological Processes	GO:0050432	catecholamine secretion	62/24156	0.04	11	-10	-8	ADORA2A|ADRA2A|ADRA2B|ADRA2C|AGTR2|CNR1|DRD2|DRD3|HTR1B|HTR2A|NPY2R
GO Biological Processes	GO:0035249	synaptic transmission, glutamatergic	105/24156	0.0436364	12	-8.5	-6.7	ADORA1|ADORA2A|CNR1|DRD1|DRD2|DRD3|EGFR|HTR1B|HTR2A|NPY2R|PTGS2|CCR2
GO Biological Processes	GO:0032228	regulation of synaptic transmission, GABAergic	34/24156	0.0290909	8	-8.4	-6.6	ADORA1|ADORA2A|ADRA1A|CA2|CA7|CNR1|DRD2|HTR1B
GO Biological Processes	GO:0070997	neuron death	355/24156	0.0727273	20	-8.3	-6.4	ADORA1|ADORA2A|AKT1|APP|CASP3|FYN|GAPDH|GBA|HSPA5|JUN|MAPT|MCL1|POLB|PPARA|SIX1|STAT3|THRB|TP53|SIGMAR1|BACE1
GO Cellular Components	GO:0030425	dendrite	640/24156	0.156364	43	-20	-18	ADORA1|ADORA2A|APP|CHRM1|CHRM2|CHRM3|CHRM4|CHRM5|CRHBP|CRHR2|DRD1|DRD2|DRD4|FYN|GLRA1|GLRB|GNAO1|GNAS|HTT|HRH1|HRH2|HTR1A|HTR1B|HTR2A|HTR2B|HTR2C|HTR6|HTR7|INSR|MAPT|NOS1|OPRD1|OPRM1|PDE4B|PPP3CA|MAPK1|RARA|RGS12|STAT1|TRPV1|GLRA3|BACE1|CCR2
GO Cellular Components	GO:0097447	dendritic tree	642/24156	0.156364	43	-20	-18	ADORA1|ADORA2A|APP|CHRM1|CHRM2|CHRM3|CHRM4|CHRM5|CRHBP|CRHR2|DRD1|DRD2|DRD4|FYN|GLRA1|GLRB|GNAO1|GNAS|HTT|HRH1|HRH2|HTR1A|HTR1B|HTR2A|HTR2B|HTR2C|HTR6|HTR7|INSR|MAPT|NOS1|OPRD1|OPRM1|PDE4B|PPP3CA|MAPK1|RARA|RGS12|STAT1|TRPV1|GLRA3|BACE1|CCR2
GO Cellular Components	GO:0099056	integral component of presynaptic membrane	74/24156	0.0581818	16	-16	-13	ADORA1|ADORA2A|ADRA1A|CHRM1|CHRM2|CHRM3|CNR1|DRD1|DRD2|GLRA1|HTR1B|HTR2A|OPRD1|OPRM1|SLC6A3|SLC6A4
GO Cellular Components	GO:0045121	membrane raft	327/24156	0.0981818	27	-15	-13	ADRA1B|ADRA1A|APP|CASP3|CNR1|EGFR|FYN|GNAI1|HTR2A|INSR|LCK|MAPT|NOS1|NPC1|OPRD1|OPRM1|MAPK1|MAPK3|PTGS2|PTPRC|SLC6A2|SLC6A3|SLC6A4|SRC|ABCG2|RGS19|BACE1
GO Cellular Components	GO:0098857	membrane microdomain	328/24156	0.0981818	27	-15	-13	ADRA1B|ADRA1A|APP|CASP3|CNR1|EGFR|FYN|GNAI1|HTR2A|INSR|LCK|MAPT|NOS1|NPC1|OPRD1|OPRM1|MAPK1|MAPK3|PTGS2|PTPRC|SLC6A2|SLC6A3|SLC6A4|SRC|ABCG2|RGS19|BACE1
GO Cellular Components	GO:0098589	membrane region	341/24156	0.0981818	27	-15	-12	ADRA1B|ADRA1A|APP|CASP3|CNR1|EGFR|FYN|GNAI1|HTR2A|INSR|LCK|MAPT|NOS1|NPC1|OPRD1|OPRM1|MAPK1|MAPK3|PTGS2|PTPRC|SLC6A2|SLC6A3|SLC6A4|SRC|ABCG2|RGS19|BACE1
GO Cellular Components	GO:0098889	intrinsic component of presynaptic membrane	83/24156	0.0581818	16	-15	-12	ADORA1|ADORA2A|ADRA1A|CHRM1|CHRM2|CHRM3|CNR1|DRD1|DRD2|GLRA1|HTR1B|HTR2A|OPRD1|OPRM1|SLC6A3|SLC6A4
GO Cellular Components	GO:0098794	postsynapse	637/24156	0.127273	35	-14	-12	ADORA1|ADORA2A|ADRA1A|ADRA2C|AKT1|APP|CHRM1|CHRM2|CHRM3|CHRM4|CHRM5|DRD1|DRD2|DRD3|DRD4|FYN|GLRA1|GLRA2|GLRB|HTT|HTR2A|MAPT|NOS1|OPRD1|OPRM1|PDE4B|PPP3CA|MAPK1|SLC6A3|SLC6A4|SRC|STAT3|TRPV1|GLRA3|SIGMAR1
GO Cellular Components	GO:0090575	RNA polymerase II transcription factor complex	162/24156	0.0690909	19	-13	-11	CBFB|NR5A1|KAT2A|JUN|SMAD2|SMAD3|PPARA|PPARD|PPARG|RARA|RXRA|STAT3|THRB|TP53|VDR|NR1I2|NR1I3|NR1H4|YAP1
GO Cellular Components	GO:0099699	integral component of synaptic membrane	154/24156	0.0654545	18	-13	-10	ADORA1|ADORA2A|ADRA1A|ADRA2C|CHRM1|CHRM2|CHRM3|CNR1|DRD1|DRD2|DRD3|GLRA1|HTR1B|HTR2A|OPRD1|OPRM1|SLC6A3|SLC6A4
GO Cellular Components	GO:0045211	postsynaptic membrane	283/24156	0.0836364	23	-13	-10	ADORA1|ADORA2A|ADRA1A|ADRA2C|CHRM1|CHRM2|CHRM3|CHRM4|CHRM5|DRD1|DRD2|DRD3|GLRA1|GLRA2|GLRB|HTR2A|OPRD1|OPRM1|SLC6A3|SLC6A4|TRPV1|GLRA3|SIGMAR1
GO Cellular Components	GO:0097060	synaptic membrane	388/24156	0.0945455	26	-12	-10	ADORA1|ADORA2A|ADRA1A|ADRA2C|CHRM1|CHRM2|CHRM3|CHRM4|CHRM5|CNR1|DRD1|DRD2|DRD3|GLRA1|GLRA2|GLRB|HTR1B|HTR2A|OPRD1|OPRM1|SLC6A2|SLC6A3|SLC6A4|TRPV1|GLRA3|SIGMAR1
GO Cellular Components	GO:0099055	integral component of postsynaptic membrane	117/24156	0.0581818	16	-12	-10	ADORA1|ADORA2A|ADRA1A|ADRA2C|CHRM1|CHRM2|CHRM3|DRD1|DRD2|DRD3|GLRA1|HTR2A|OPRD1|OPRM1|SLC6A3|SLC6A4
GO Cellular Components	GO:0098936	intrinsic component of postsynaptic membrane	122/24156	0.0581818	16	-12	-9.9	ADORA1|ADORA2A|ADRA1A|ADRA2C|CHRM1|CHRM2|CHRM3|DRD1|DRD2|DRD3|GLRA1|HTR2A|OPRD1|OPRM1|SLC6A3|SLC6A4
GO Cellular Components	GO:0099240	intrinsic component of synaptic membrane	166/24156	0.0654545	18	-12	-9.9	ADORA1|ADORA2A|ADRA1A|ADRA2C|CHRM1|CHRM2|CHRM3|CNR1|DRD1|DRD2|DRD3|GLRA1|HTR1B|HTR2A|OPRD1|OPRM1|SLC6A3|SLC6A4
GO Cellular Components	GO:0044798	nuclear transcription factor complex	201/24156	0.0690909	19	-12	-9.5	CBFB|NR5A1|KAT2A|JUN|SMAD2|SMAD3|PPARA|PPARD|PPARG|RARA|RXRA|STAT3|THRB|TP53|VDR|NR1I2|NR1I3|NR1H4|YAP1
GO Cellular Components	GO:0042734	presynaptic membrane	156/24156	0.0618182	17	-12	-9.4	ADORA1|ADORA2A|ADRA1A|CHRM1|CHRM2|CHRM3|CNR1|DRD1|DRD2|GLRA1|HTR1B|HTR2A|OPRD1|OPRM1|SLC6A2|SLC6A3|SLC6A4
GO Cellular Components	GO:0005667	transcription factor complex	360/24156	0.0872727	24	-11	-9.2	AHR|APEX1|CBFB|NR5A1|KAT2A|JUN|SMAD2|SMAD3|PPARA|PPARD|PPARG|RARA|RELA|RXRA|SIX1|STAT3|THRB|TP53|VDR|NR1I2|HDAC9|NR1I3|NR1H4|YAP1
GO Cellular Components	GO:0030424	axon	637/24156	0.105455	29	-9.6	-7.6	ADORA1|ADORA2A|ADRA2C|APP|CA2|CALCR|CHRM1|CHRM2|CHRM3|CNR1|CRHBP|CRHR2|DRD2|GLRA1|HTT|HTR1B|HTR2A|INSR|MAPT|NOS1|OPRD1|OPRM1|MAPK1|SLC6A3|SMN1|SMN2|STAT1|SIGMAR1|BACE1
GO Cellular Components	GO:0098793	presynapse	523/24156	0.0945455	26	-9.4	-7.5	ADORA1|ADORA2A|ADRA1A|ADRA2C|APP|CHRM1|CHRM2|CHRM3|CNR1|CRHBP|CRHR2|DRD1|DRD2|DRD3|GLRA1|HTT|HTR1B|HTR2A|NOS1|OPRD1|OPRM1|PDE4B|SLC6A2|SLC6A3|SLC6A4|BACE1
GO Cellular Components	GO:0044306	neuron projection terminus	146/24156	0.0436364	12	-6.9	-5.2	ADORA1|ADRA2C|CHRM1|CHRM2|CHRM3|CRHBP|CRHR2|DRD2|GLRA1|HTR1B|NOS1|OPRD1
GO Molecular Functions	GO:0008227	G protein-coupled amine receptor activity	62/24156	0.0981818	27	-36	-32	ADRA1D|ADRA1B|ADRA1A|ADRA2A|ADRA2B|ADRA2C|ADRB1|ADRB2|ADRB3|CHRM1|CHRM2|CHRM3|CHRM4|CHRM5|DRD1|DRD2|DRD3|DRD4|HRH1|HRH2|HTR1A|HTR1B|HTR2A|HTR2B|HTR2C|HTR6|HTR7
GO Molecular Functions	GO:0004879	nuclear receptor activity	47/24156	0.0763636	21	-28	-25	NR0B1|AHR|AR|ESR1|ESR2|ESRRA|NR5A1|NR3C1|PGR|PPARA|PPARD|PPARG|RARA|RORC|RXRA|STAT3|THRB|VDR|NR1I2|NR1I3|NR1H4
GO Molecular Functions	GO:0098531	transcription factor activity, direct ligand regulated sequence-specific DNA binding	47/24156	0.0763636	21	-28	-25	NR0B1|AHR|AR|ESR1|ESR2|ESRRA|NR5A1|NR3C1|PGR|PPARA|PPARD|PPARG|RARA|RORC|RXRA|STAT3|THRB|VDR|NR1I2|NR1I3|NR1H4
GO Molecular Functions	GO:0030594	neurotransmitter receptor activity	116/24156	0.0909091	25	-24	-21	ADORA1|ADRB1|CHRM1|CHRM2|CHRM3|CHRM4|CHRM5|DRD1|DRD2|DRD3|DRD4|GLRA1|GLRA2|GLRB|HRH1|HRH2|HTR1A|HTR1B|HTR2A|HTR2B|HTR2C|HTR6|HTR7|OPRM1|GLRA3
GO Molecular Functions	GO:0003707	steroid hormone receptor activity	56/24156	0.0690909	19	-23	-20	NR0B1|AR|ESR1|ESR2|ESRRA|NR5A1|NR3C1|PGR|PPARA|PPARD|PPARG|RARA|RORC|RXRA|THRB|VDR|NR1I2|NR1I3|NR1H4
GO Molecular Functions	GO:0099528	G protein-coupled neurotransmitter receptor activity	41/24156	0.0618182	17	-22	-19	ADRB1|CHRM1|CHRM2|CHRM3|CHRM4|CHRM5|DRD4|HRH1|HRH2|HTR1A|HTR1B|HTR2A|HTR2B|HTR2C|HTR6|HTR7|OPRM1
GO Molecular Functions	GO:0001653	peptide receptor activity	152/24156	0.0945455	26	-22	-20	AGTR2|AVPR1A|BDKRB2|CALCR|CCKAR|CCR4|CCR5|CRHR2|EDNRA|CXCR1|CXCR2|MC3R|MC4R|MC5R|NPY1R|NPY2R|OPRD1|OPRK1|OPRM1|PTH1R|TACR2|TACR1|VIPR1|SIGMAR1|CYSLTR1|CCR2
GO Molecular Functions	GO:0008528	G protein-coupled peptide receptor activity	146/24156	0.0909091	25	-22	-19	AGTR2|AVPR1A|BDKRB2|CALCR|CCKAR|CCR4|CCR5|EDNRA|CXCR1|CXCR2|MC3R|MC4R|MC5R|NPY1R|NPY2R|OPRD1|OPRK1|OPRM1|PTH1R|TACR2|TACR1|VIPR1|SIGMAR1|CYSLTR1|CCR2
GO Molecular Functions	GO:0004993	G protein-coupled serotonin receptor activity	34/24156	0.0545455	15	-20	-17	CHRM1|CHRM2|CHRM3|CHRM4|CHRM5|DRD4|HRH1|HRH2|HTR1A|HTR1B|HTR2A|HTR2B|HTR2C|HTR6|HTR7
GO Molecular Functions	GO:0099589	serotonin receptor activity	34/24156	0.0545455	15	-20	-17	CHRM1|CHRM2|CHRM3|CHRM4|CHRM5|DRD4|HRH1|HRH2|HTR1A|HTR1B|HTR2A|HTR2B|HTR2C|HTR6|HTR7
GO Molecular Functions	GO:0008134	transcription factor binding	659/24156	0.156364	43	-20	-17	AGTR2|NR0B1|AHR|APEX1|AR|BRCA1|MAPK14|ESR1|EYA2|KAT2A|HMGB1|HYAL1|JUN|SMAD2|SMAD3|NFE2L2|NFKB1|PPARA|PPARD|PPARG|MAPK1|RAN|RARA|RELA|RORC|RXRA|SIX1|SMARCA4|SRC|STAT1|STAT3|STAT5B|THRB|TP53|UBE2I|VDR|NR1I2|HDAC9|NR1I3|NR1H4|UBA2|YAP1|GMNN
GO Molecular Functions	GO:0042562	hormone binding	105/24156	0.0763636	21	-20	-17	ACHE|ALDH1A1|AR|AVPR1A|CALCR|CCKAR|CHRM3|CRHBP|CRHR2|EGFR|NR3C1|INSR|MC3R|MC4R|MC5R|PKM|PTH1R|THRB|TTR|VDR|VIPR1
GO Molecular Functions	GO:0004935	adrenergic receptor activity	19/24156	0.0436364	12	-19	-16	ADRA1D|ADRA1B|ADRA1A|ADRA2A|ADRA2B|ADRA2C|ADRB1|ADRB2|ADRB3|DRD1|DRD2|DRD3
GO Molecular Functions	GO:1901338	catecholamine binding	20/24156	0.04	11	-16	-14	ADRA2A|ADRA2B|ADRA2C|ADRB1|ADRB2|ADRB3|DRD1|DRD2|DRD3|DRD4|SLC6A3
GO Molecular Functions	GO:0016491	oxidoreductase activity	749/24156	0.141818	39	-15	-12	ALDH1A1|ALDH2|AKR1B1|ALOX5|APEX1|CRYZ|CYP1A1|CYP1A2|CYP2A6|CYP2C19|CYP2C9|CYP2D6|CYP2E1|CYP3A4|CYP19A1|GAPDH|GFER|HSD17B10|HMGCR|HPGD|HSD11B1|HSD11B2|MAOA|MAOB|MPO|NOS1|NOS2|PTGS1|PTGS2|SORD|SRD5A1|TBXAS1|TXNRD1|TYR|XDH|GSTO1|KDM4A|ABCC4|KDM4E
GO Molecular Functions	GO:0042165	neurotransmitter binding	56/24156	0.0472727	13	-13	-11	ACHE|CHRM3|CRHBP|GLRA1|GLRA2|GLRB|HTR1A|HTR1B|HTR2A|HTR2B|HTR2C|SLC6A4|GLRA3
GO Molecular Functions	GO:0051379	epinephrine binding	8/24156	0.0254545	7	-13	-10	ADRA2A|ADRA2B|ADRA2C|ADRB1|ADRB2|ADRB3|DRD4
GO Molecular Functions	GO:0048037	cofactor binding	509/24156	0.109091	30	-13	-10	ALDH1A1|ALDH2|CRYZ|CYP1A1|CYP1A2|CYP2A6|CYP2C19|CYP2C9|CYP2D6|CYP2E1|CYP3A4|CYP19A1|GAPDH|GFER|HMGCR|HPGD|HSD11B2|MAOB|MPO|NOS1|NOS2|PTGS1|PTGS2|SORD|SRC|SRD5A1|TBXAS1|TPMT|TXNRD1|XDH
GO Molecular Functions	GO:0005496	steroid binding	95/24156	0.0545455	15	-13	-10	AR|CYP3A4|ESR1|ESR2|ESRRA|NR3C1|HSD11B1|HSD11B2|NPC1|PGR|RORC|VDR|NR1H4|UGT1A8|UGT1A1
GO Molecular Functions	GO:0003682	chromatin binding	555/24156	0.112727	31	-12	-10	APEX1|AR|EGFR|ESR1|NR5A1|KAT2A|GLI3|JUN|SMAD2|SMAD3|MEN1|MITF|MPO|NFKB1|NFKB2|PPARG|RAN|RARA|RELA|RXRA|SIX1|SMARCA4|STAT1|STAT3|STAT5B|THRB|TP53|YAP1|EHMT2|CBX1|GMNN
GO Molecular Functions	GO:0019904	protein domain specific binding	712/24156	0.127273	35	-12	-10	ADRB1|NR0B1|APP|AR|CASP1|ABCC2|DRD3|DRD4|ESRRA|FYN|GAPDH|GUSB|HSPA5|IL1B|INSR|JUN|KCNH2|KPNB1|LCK|SMAD2|MAPT|MCL1|NFE2L2|OPRM1|PLAUR|PLG|PPARA|PPARG|RARA|RELA|RXRA|SRC|TP53|UBE2I|EHMT2
GO Molecular Functions	GO:0019902	phosphatase binding	185/24156	0.0690909	19	-12	-10	AKT1|MAPK14|EGFR|ERBB2|KAT2A|HMGCR|LCK|SMAD2|SMAD3|MAPT|PPARA|PPARG|MAPK1|MAPK3|PTPN1|SLC6A3|STAT1|STAT3|TP53
GO Molecular Functions	GO:0000978	RNA polymerase II proximal promoter sequence-specific DNA binding	604/24156	0.116364	32	-12	-10	AHR|APP|AR|ESR1|ESR2|ESRRA|NR5A1|GLI3|NR3C1|JUN|SMAD2|SMAD3|MITF|NFE2L2|NFKB1|NFKB2|PGR|PPARA|PPARG|RARA|RELA|RORC|RXRA|SIX1|SMARCA4|STAT1|STAT3|STAT5B|TP53|VDR|NR1H4|YAP1
GO Molecular Functions	GO:0000987	proximal promoter sequence-specific DNA binding	629/24156	0.116364	32	-12	-9.6	AHR|APP|AR|ESR1|ESR2|ESRRA|NR5A1|GLI3|NR3C1|JUN|SMAD2|SMAD3|MITF|NFE2L2|NFKB1|NFKB2|PGR|PPARA|PPARG|RARA|RELA|RORC|RXRA|SIX1|SMARCA4|STAT1|STAT3|STAT5B|TP53|VDR|NR1H4|YAP1
GO Molecular Functions	GO:0004936	alpha-adrenergic receptor activity	6/24156	0.0218182	6	-12	-9.5	ADRA1D|ADRA1B|ADRA1A|ADRA2A|ADRA2B|ADRA2C
GO Molecular Functions	GO:0020037	heme binding	135/24156	0.0581818	16	-11	-9.3	CYP1A1|CYP1A2|CYP2A6|CYP2C19|CYP2C9|CYP2D6|CYP2E1|CYP3A4|CYP19A1|MPO|NOS1|NOS2|PTGS1|PTGS2|SRC|TBXAS1
GO Molecular Functions	GO:0033293	monocarboxylic acid binding	77/24156	0.0472727	13	-11	-9.3	PPARA|PPARD|PPARG|RARA|RXRA|UGT2B15|VDR|NR1H4|UGT1A10|UGT1A8|UGT1A4|UGT1A1|UGT1A3
GO Molecular Functions	GO:0070405	ammonium ion binding	78/24156	0.0472727	13	-11	-9.2	ACHE|CHRM3|DRD1|DRD2|DRD3|DRD4|HTR1A|HTR1B|HTR2A|HTR2B|HTR2C|SLC6A3|SLC6A4
GO Molecular Functions	GO:0031406	carboxylic acid binding	220/24156	0.0690909	19	-11	-8.9	GLRA1|GLRA2|GLRB|NOS1|NOS2|PPARA|PPARD|PPARG|RARA|RXRA|UGT2B15|VDR|GLRA3|NR1H4|UGT1A10|UGT1A8|UGT1A4|UGT1A1|UGT1A3
GO Molecular Functions	GO:0046906	tetrapyrrole binding	145/24156	0.0581818	16	-11	-8.9	CYP1A1|CYP1A2|CYP2A6|CYP2C19|CYP2C9|CYP2D6|CYP2E1|CYP3A4|CYP19A1|MPO|NOS1|NOS2|PTGS1|PTGS2|SRC|TBXAS1
GO Molecular Functions	GO:0042277	peptide binding	319/24156	0.08	22	-11	-8.6	ACHE|ADRB2|AVPR1A|CALCR|CCKAR|CRHBP|CRHR2|INSR|KPNB1|MC3R|MC4R|OPRD1|OPRK1|OPRM1|PPARG|PPP3CA|PTH1R|RELA|RXRA|VIPR1|BACE1|ERAP1
GO Molecular Functions	GO:0043177	organic acid binding	232/24156	0.0690909	19	-11	-8.5	GLRA1|GLRA2|GLRB|NOS1|NOS2|PPARA|PPARD|PPARG|RARA|RXRA|UGT2B15|VDR|GLRA3|NR1H4|UGT1A10|UGT1A8|UGT1A4|UGT1A1|UGT1A3
GO Molecular Functions	GO:0008289	lipid binding	755/24156	0.12	33	-10	-8.3	AKT1|AR|CYP3A4|ESR1|ESR2|ESRRA|NR5A1|NR3C1|HMGB1|HSD11B1|HSD11B2|IL2|MAPT|NPC1|PGR|PPARA|PPARD|PPARG|PTAFR|RARA|RORC|RXRA|UGT2B15|VDR|TRPV1|PLA2G7|NR1H4|RACGAP1|UGT1A10|UGT1A8|UGT1A4|UGT1A1|UGT1A3
GO Molecular Functions	GO:0051427	hormone receptor binding	186/24156	0.0618182	17	-10	-8.2	NR0B1|BRCA1|ESR1|FYN|GNAO1|GNAS|SMAD3|PPARG|RAN|RXRA|SMARCA4|SRC|STAT1|STAT3|STAT5B|VDR|NR1H4
GO Molecular Functions	GO:0016705	oxidoreductase activity, acting on paired donors, with incorporation or reduction of molecular oxyge	161/24156	0.0581818	16	-10	-8.2	CYP1A1|CYP1A2|CYP2A6|CYP2C19|CYP2C9|CYP2D6|CYP2E1|CYP3A4|CYP19A1|NOS1|NOS2|PTGS1|PTGS2|TBXAS1|TYR|KDM4A
GO Molecular Functions	GO:0033218	amide binding	383/24156	0.0836364	23	-10	-8	ACHE|ADRB2|AVPR1A|CALCR|CCKAR|CRHBP|CRHR2|INSR|KPNB1|MC3R|MC4R|OPRD1|OPRK1|OPRM1|PPARG|PPP3CA|PTH1R|RELA|RXRA|SRD5A1|VIPR1|BACE1|ERAP1
GO Molecular Functions	GO:0035240	dopamine binding	13/24156	0.0181818	5	-6.7	-4.9	DRD1|DRD2|DRD3|DRD4|SLC6A3
GO Molecular Functions	GO:0001664	G protein-coupled receptor binding	287/24156	0.0581818	16	-6.7	-4.9	ADORA1|ADORA2A|ADRA2A|ADRA2C|ADRB1|AVPR1A|BDKRB2|DRD3|FYN|GNAI1|GNAO1|GNAS|IL2|STAT1|STAT3|CCR2
GO Molecular Functions	GO:0042923	neuropeptide binding	24/24156	0.0181818	5	-5.2	-3.7	MC3R|MC4R|OPRD1|OPRK1|OPRM1
KEGG Pathway	hsa04080	Neuroactive ligand-receptor interaction	277/24156	0.221818	61	-60	-56	ADORA1|ADORA2A|ADORA3|ADRA1D|ADRA1B|ADRA1A|ADRA2A|ADRA2B|ADRA2C|ADRB1|ADRB2|ADRB3|AGTR2|AVPR1A|BDKRB2|CALCR|CCKAR|CHRM1|CHRM2|CHRM3|CHRM4|CHRM5|CNR1|CRHR2|CTSG|DRD1|DRD2|DRD3|DRD4|EDNRA|GLRA1|GLRA2|GLRB|NR3C1|HRH1|HRH2|HTR1A|HTR1B|HTR2A|HTR2B|HTR2C|HTR6|HTR7|MC3R|MC4R|MC5R|NPY1R|NPY2R|OPRD1|OPRK1|OPRM1|PLG|PTAFR|PTH1R|TACR2|TACR1|THRB|VIPR1|TRPV1|GLRA3|CYSLTR1
KEGG Pathway	hsa04020	Calcium signaling pathway	182/24156	0.123636	34	-31	-27	ADORA2A|ADRA1D|ADRA1B|ADRA1A|ADRB1|ADRB2|ADRB3|AVPR1A|BDKRB2|CCKAR|CHRM1|CHRM2|CHRM3|CHRM5|DRD1|EDNRA|EGFR|ERBB2|GNAS|HRH1|HRH2|HTR2A|HTR2B|HTR2C|HTR6|HTR7|NOS1|NOS2|PPP3CA|PRKCA|PTAFR|TACR2|TACR1|CYSLTR1
KEGG Pathway	hsa04726	Serotonergic synapse	113/24156	0.0872727	24	-23	-20	ALOX5|APP|CASP3|CYP2C19|CYP2C9|CYP2D6|GNAI1|GNAO1|GNAS|HTR1A|HTR1B|HTR2A|HTR2B|HTR2C|HTR6|HTR7|MAOA|MAOB|PRKCA|MAPK1|MAPK3|PTGS1|PTGS2|SLC6A4
KEGG Pathway	hsa04659	Th17 cell differentiation	107/24156	0.08	22	-21	-18	AHR|MAPK14|IL1B|IL2|JUN|LCK|SMAD2|SMAD3|NFKB1|PPP3CA|MAPK1|MAPK3|MAPK11|MAPK13|RARA|RELA|RORC|RXRA|MAPK12|STAT1|STAT3|STAT5B
KEGG Pathway	hsa04024	cAMP signaling pathway	198/24156	0.0909091	25	-18	-16	ADORA1|ADORA2A|ADRB1|ADRB2|AKT1|CHRM1|CHRM2|DRD1|DRD2|EDNRA|GLI3|GNAI1|GNAS|HTR1A|HTR1B|HTR6|JUN|NFKB1|NPY1R|PDE4B|PPARA|MAPK1|MAPK3|RELA|ABCC4
KEGG Pathway	hsa05200	Pathways in cancer	395/24156	0.12	33	-18	-16	AKT1|AR|BDKRB2|CASP3|EDNRA|EGFR|ERBB2|GLI3|GNAI1|GNAS|JUN|SMAD2|SMAD3|MITF|MMP1|MMP2|MMP9|NFKB1|NFKB2|NOS2|PPARD|PPARG|PRKCA|MAPK1|MAPK3|PTGS2|RARA|RELA|RXRA|STAT1|STAT3|STAT5B|TP53
KEGG Pathway	hsa00982	Drug metabolism - cytochrome P450	70/24156	0.0618182	17	-18	-15	CYP1A2|CYP2A6|CYP2C19|CYP2C9|CYP2D6|CYP2E1|CYP3A4|MAOA|MAOB|UGT2B15|GSTO1|UGT2A1|UGT1A10|UGT1A8|UGT1A4|UGT1A1|UGT1A3
KEGG Pathway	hsa04933	AGE-RAGE signaling pathway in diabetic complications	99/24156	0.0690909	19	-18	-15	AKT1|CASP3|MAPK14|IL1B|JUN|SMAD2|SMAD3|MMP2|NFKB1|PRKCA|MAPK1|MAPK3|MAPK11|MAPK13|RELA|MAPK12|STAT1|STAT3|STAT5B
KEGG Pathway	hsa05142	Chagas disease (American trypanosomiasis)	102/24156	0.0690909	19	-17	-15	AKT1|BDKRB2|MAPK14|GNAI1|GNAO1|GNAS|IL1B|IL2|JUN|SMAD2|SMAD3|NFKB1|NOS2|MAPK1|MAPK3|MAPK11|MAPK13|RELA|MAPK12
KEGG Pathway	hsa00140	Steroid hormone biosynthesis	58/24156	0.0545455	15	-16	-14	CYP1A1|CYP1A2|CYP2E1|CYP3A4|CYP19A1|HSD11B1|HSD11B2|SRD5A1|UGT2B15|UGT2A1|UGT1A10|UGT1A8|UGT1A4|UGT1A1|UGT1A3
KEGG Pathway	hsa04071	Sphingolipid signaling pathway	118/24156	0.0690909	19	-16	-14	ADORA1|ADORA3|AKT1|BDKRB2|MAPK14|FYN|GNAI1|ABCC1|NFKB1|OPRD1|PRKCA|MAPK1|MAPK3|MAPK11|MAPK13|RELA|MAPK12|SMPD1|TP53
KEGG Pathway	hsa04022	cGMP-PKG signaling pathway	163/24156	0.0763636	21	-16	-13	ADORA1|ADORA3|ADRA1D|ADRA1B|ADRA1A|ADRA2A|ADRA2B|ADRA2C|ADRB1|ADRB2|ADRB3|AKT1|BDKRB2|EDNRA|GNAI1|INSR|OPRD1|PPP3CA|MAPK1|MAPK3|PDE5A
KEGG Pathway	hsa01522	Endocrine resistance	96/24156	0.0654545	18	-16	-14	AKT1|MAPK14|CYP2D6|EGFR|ERBB2|ESR1|ESR2|GNAS|JUN|MMP2|MMP9|MAPK1|MAPK3|MAPK11|MAPK13|MAPK12|SRC|TP53
KEGG Pathway	hsa04380	Osteoclast differentiation	130/24156	0.0727273	20	-16	-14	AKT1|CALCR|MAPK14|FYN|IL1B|JUN|LCK|MITF|NFKB1|NFKB2|PPARG|PPP3CA|MAPK1|MAPK3|MAPK11|MAPK13|RELA|MAPK12|STAT1|TNFSF11
KEGG Pathway	hsa05204	Chemical carcinogenesis	82/24156	0.0618182	17	-16	-14	CYP1A1|CYP1A2|CYP2A6|CYP2C19|CYP2C9|CYP2E1|CYP3A4|HSD11B1|PTGS2|UGT2B15|GSTO1|UGT2A1|UGT1A10|UGT1A8|UGT1A4|UGT1A1|UGT1A3
KEGG Pathway	hsa04917	Prolactin signaling pathway	70/24156	0.0581818	16	-16	-14	AKT1|MAPK14|ESR1|ESR2|NFKB1|MAPK1|MAPK3|MAPK11|MAPK13|RELA|MAPK12|SRC|STAT1|STAT3|STAT5B|TNFSF11
KEGG Pathway	hsa00980	Metabolism of xenobiotics by cytochrome P450	74/24156	0.0581818	16	-16	-13	CYP1A1|CYP1A2|CYP2A6|CYP2C9|CYP2D6|CYP2E1|CYP3A4|HSD11B1|UGT2B15|GSTO1|UGT2A1|UGT1A10|UGT1A8|UGT1A4|UGT1A1|UGT1A3
KEGG Pathway	hsa05133	Pertussis	76/24156	0.0545455	15	-14	-12	CASP1|CASP3|CASP7|MAPK14|GNAI1|IL1B|JUN|NFKB1|NOS2|MAPK1|MAPK3|MAPK11|MAPK13|RELA|MAPK12
KEGG Pathway	hsa05145	Toxoplasmosis	113/24156	0.0618182	17	-14	-12	AKT1|ALOX5|CASP3|CCR5|MAPK14|GNAI1|GNAO1|NFKB1|NOS2|MAPK1|MAPK3|MAPK11|MAPK13|RELA|MAPK12|STAT1|STAT3
KEGG Pathway	hsa04728	Dopaminergic synapse	130/24156	0.0618182	17	-13	-11	AKT1|MAPK14|DRD1|DRD2|DRD3|DRD4|GNAI1|GNAO1|GNAS|MAOA|MAOB|PPP3CA|PRKCA|MAPK11|MAPK13|MAPK12|SLC6A3
KEGG Pathway	hsa04976	Bile secretion	71/24156	0.0509091	14	-13	-11	CA2|ABCC2|CYP3A4|GNAS|HMGCR|RXRA|SLC5A1|SLCO1A2|ABCC3|ABCG2|NR1H4|ABCC4|SLCO1B1|SLCO1B3
KEGG Pathway	hsa00983	Drug metabolism - other enzymes	46/24156	0.0436364	12	-13	-11	CYP2A6|CYP3A4|GUSB|TPMT|UGT2B15|XDH|UGT2A1|UGT1A10|UGT1A8|UGT1A4|UGT1A1|UGT1A3
KEGG Pathway	hsa05205	Proteoglycans in cancer	203/24156	0.0727273	20	-13	-10	AKT1|CASP3|MAPK14|EGFR|ERBB2|ESR1|SMAD2|MMP2|MMP9|PLAU|PLAUR|PRKCA|MAPK1|MAPK3|MAPK11|MAPK13|MAPK12|SRC|STAT3|TP53
KEGG Pathway	hsa04750	Inflammatory mediator regulation of TRP channels	97/24156	0.0545455	15	-12	-10	BDKRB2|MAPK14|GNAS|HRH1|HTR2A|HTR2B|HTR2C|IL1B|PRKCA|MAPK11|MAPK13|MAPK12|SRC|TRPV1|TRPA1
KEGG Pathway	hsa00830	Retinol metabolism	65/24156	0.0472727	13	-12	-10	ALDH1A1|CYP1A1|CYP1A2|CYP2A6|CYP2C9|CYP3A4|UGT2B15|UGT2A1|UGT1A10|UGT1A8|UGT1A4|UGT1A1|UGT1A3
KEGG Pathway	hsa04660	T cell receptor signaling pathway	103/24156	0.0545455	15	-12	-9.9	AKT1|MAPK14|FYN|IL2|JUN|LCK|NFKB1|PPP3CA|MAPK1|MAPK3|MAPK11|MAPK13|PTPRC|RELA|MAPK12
KEGG Pathway	hsa04668	TNF signaling pathway	108/24156	0.0545455	15	-12	-9.6	AKT1|CASP3|CASP7|MAPK14|IL1B|JUN|MMP9|NFKB1|MAPK1|MAPK3|MAPK11|MAPK13|PTGS2|RELA|MAPK12
KEGG Pathway	hsa05140	Leishmaniasis	73/24156	0.0472727	13	-12	-9.6	MAPK14|IL1B|JUN|NFKB1|NOS2|MAPK1|MAPK3|MAPK11|MAPK13|PTGS2|RELA|MAPK12|STAT1
KEGG Pathway	hsa04658	Th1 and Th2 cell differentiation	92/24156	0.0509091	14	-12	-9.4	MAPK14|IL2|JUN|LCK|NFKB1|PPP3CA|MAPK1|MAPK3|MAPK11|MAPK13|RELA|MAPK12|STAT1|STAT5B
KEGG Pathway	hsa04657	IL-17 signaling pathway	93/24156	0.0509091	14	-12	-9.4	CASP3|MAPK14|IL1B|JUN|MMP1|MMP9|NFKB1|MAPK1|MAPK3|MAPK11|MAPK13|PTGS2|RELA|MAPK12
KEGG Pathway	hsa00040	Pentose and glucuronate interconversions	34/24156	0.0363636	10	-11	-9.4	AKR1B1|GUSB|SORD|UGT2B15|UGT2A1|UGT1A10|UGT1A8|UGT1A4|UGT1A1|UGT1A3
KEGG Pathway	hsa04915	Estrogen signaling pathway	98/24156	0.0509091	14	-11	-9.1	AKT1|EGFR|ESR1|ESR2|GNAI1|GNAO1|GNAS|JUN|MMP2|MMP9|OPRM1|MAPK1|MAPK3|SRC
KEGG Pathway	hsa05212	Pancreatic cancer	64/24156	0.0436364	12	-11	-9	AKT1|EGFR|ERBB2|SMAD2|SMAD3|NFKB1|MAPK1|MAPK3|RELA|STAT1|STAT3|TP53
KEGG Pathway	hsa04261	Adrenergic signaling in cardiomyocytes	144/24156	0.0581818	16	-11	-8.9	ADRA1D|ADRA1B|ADRA1A|ADRB1|ADRB2|AGTR2|AKT1|MAPK14|GNAI1|GNAS|PRKCA|MAPK1|MAPK3|MAPK11|MAPK13|MAPK12
KEGG Pathway	M00014	Glucuronate pathway (uronate pathway)	27/24156	0.0327273	9	-11	-8.9	GUSB|SORD|UGT2B15|UGT2A1|UGT1A10|UGT1A8|UGT1A4|UGT1A1|UGT1A3
KEGG Pathway	hsa05120	Epithelial cell signaling in Helicobacter pylori infection	68/24156	0.0436364	12	-11	-8.7	CASP3|MAPK14|EGFR|CXCR1|CXCR2|JUN|NFKB1|MAPK11|MAPK13|RELA|MAPK12|SRC
KEGG Pathway	hsa04923	Regulation of lipolysis in adipocytes	54/24156	0.04	11	-11	-8.6	ADORA1|ADRB1|ADRB2|ADRB3|AKT1|GNAI1|GNAS|INSR|NPY1R|PTGS1|PTGS2
KEGG Pathway	hsa04540	Gap junction	88/24156	0.0472727	13	-11	-8.6	ADRB1|DRD1|DRD2|EGFR|GNAI1|GNAS|HTR2A|HTR2B|HTR2C|PRKCA|MAPK1|MAPK3|SRC
KEGG Pathway	hsa05160	Hepatitis C	131/24156	0.0545455	15	-11	-8.5	AKT1|MAPK14|EGFR|NFKB1|PPARA|MAPK1|MAPK3|MAPK11|MAPK13|RELA|RXRA|MAPK12|STAT1|STAT3|TP53
KEGG Pathway	hsa04015	Rap1 signaling pathway	210/24156	0.0654545	18	-10	-8.3	ADORA2A|AKT1|CNR1|MAPK14|DRD2|EGFR|FLT1|GNAI1|GNAO1|GNAS|INSR|PRKCA|MAPK1|MAPK3|MAPK11|MAPK13|MAPK12|SRC
KEGG Pathway	hsa04370	VEGF signaling pathway	59/24156	0.04	11	-10	-8.2	AKT1|MAPK14|PPP3CA|PRKCA|MAPK1|MAPK3|MAPK11|MAPK13|PTGS2|MAPK12|SRC
KEGG Pathway	hsa05418	Fluid shear stress and atherosclerosis	142/24156	0.0545455	15	-10	-8	AKT1|MAPK14|IL1B|JUN|MMP2|MMP9|NFE2L2|NFKB1|MAPK11|MAPK13|RELA|MAPK12|SRC|TP53|GSTO1
KEGG Pathway	hsa05161	Hepatitis B	144/24156	0.0545455	15	-10	-7.9	AKT1|CASP3|JUN|SMAD3|MMP9|NFKB1|PRKCA|MAPK1|MAPK3|RELA|SRC|STAT1|STAT3|STAT5B|TP53
KEGG Pathway	hsa04725	Cholinergic synapse	112/24156	0.0472727	13	-9.3	-7.3	ACHE|AKT1|CHRM1|CHRM2|CHRM3|CHRM4|CHRM5|FYN|GNAI1|GNAO1|PRKCA|MAPK1|MAPK3
KEGG Pathway	hsa04722	Neurotrophin signaling pathway	119/24156	0.04	11	-6.9	-5.2	AKT1|MAPK14|JUN|NFKB1|MAPK1|MAPK3|MAPK11|MAPK13|RELA|MAPK12|TP53
